# Supplementary material for: Pd-catalyzed asymmetric allylic alkylations via C–H activation of N-allyl imines with glycinates
Source: Royal Society of Chemistry journal article supplement (doi:10.1039/c7sc02899g), 2017-01-01

## Supporting Information

### **Pd-Catalyzed Asymmetric Allylic Alkylations via C-H Activation of *N*-Allyl Imines with Glycinates**

Barry M. Trost\*, Xiaoxun Li

Department of Chemistry, Stanford University, Stanford, California, 94305-5080,  
United States



## Contents:

| <b>Experimentals:</b>                                                    | page |
|--------------------------------------------------------------------------|------|
| I. General .....                                                         | S3   |
| II. Preparation of Starting Materials .....                              | S4   |
| III. Reaction Optimization .....                                         | S6   |
| IV. General Method for Asymmetric Allylic Alkylations .....              | S10  |
| V. General Method for Three-component Asymmetric Allylic Alkylation..... | S35  |
| VI. General Method for Synthesis of Vicinal Diamines .....               | S43  |
| VII. Structural Derivatization of AAA products .....                     | S47  |
| VIII. References .....                                                   | S55  |
| IX. NMR Spectra .....                                                    | S56  |



**I. General:** All reactions were performed in flame- or oven-dried glassware with magnetic stirring under nitrogen or argon atmosphere using freshly distilled solvents. THF was distilled over sodium and  $\text{CH}_2\text{Cl}_2$  was obtained from a solvent purification system (activated alumina). All commercial reagents were used without purification unless otherwise noted. Air and moisture sensitive liquids and solutions were transferred via stainless steel syringe or cannula and introduced into the reaction vessel through rubber septa. Thin-layer chromatography was performed on EMD silica gel 60 F<sub>254</sub> plates (0.25 mm); visualization of the developed chromatogram was performed by fluorescence quenching and staining with aqueous ceric ammonium molybdate, *p*-anisaldehyde, or potassium permanganate. Organic solutions were concentrated by rotary evaporation below 40 °C at ca. 25 mm Hg. Chromatographic purification of products was accomplished using forced-flow chromatography on Silicycle silica gel (particle size 0.040-0.063  $\mu\text{m}$ ). All isolated and characterized compounds were >95% pure as judged by  $^1\text{H}$  NMR spectroscopic analysis. Melting points were determined on a Thomas Hoover Capillary Melting Point Apparatus and are uncorrected.  $^1\text{H}$  and  $^{13}\text{C}$  NMR spectroscopy were performed on a Varian Mercury NMR operating at 400 and 100 MHz, respectively. Chemical shifts are reported in ppm relative to the residual protiated solvent ( $\text{CDCl}_3$ :  $\delta_{\text{H}} = 7.26$  ppm,  $\delta_{\text{C}} = 77.26$  ppm); all  $^{13}\text{C}$  NMR spectra are proton decoupled. Data for  $^1\text{H}$  are reported in terms of chemical shift ( $\delta$  ppm), multiplicity (s = singlet, d = doublet, t = triplet, q = quartet, sept = septet, m = multiplet), coupling constant, and integration; data for  $^{13}\text{C}$  are reported in terms of chemical shift. Infrared spectroscopic data was recorded as thin films on sodium chloride plates on a Thermo Scientific Nicolet IR100 FT-IR spectrometer. High-resolution mass spectrometry (HRMS) was measured on a Bruker micrOTOF-Q II electrospray ionization (ESI) mass spectrometer by the Vincent Coates Foundation Mass Spectrometry Laboratory at Stanford University. Mass peaks are reported in *m/z* units.



## II. Preparation of starting materials:

Imines: Imines **1a**, **1b**, **1c**, **1d**, **1e**, **1f**, **1g**, **1h**, **1k**, **1l**, **1m**, **1p** and **1q** were prepared according to the reported literature.<sup>1</sup>

### General method for synthesis of imines:

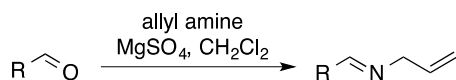

To a stirred solution of aldehyde (10.0 mmol, 1.0 equiv.) in CH<sub>2</sub>Cl<sub>2</sub> (12 mL) was added MgSO<sub>4</sub> (1.0 g) followed by allyl amine (0.82 mL, 628 mg, 11.0 mmol, 1.1 equiv.). After 24 h, the reaction was filtered through a sintered glass funnel. Solvent was removed *in vacuo*, and the residue was kept under high vacuum for 3 h. The crude material was sufficiently clean (>95% purity by NMR) and was directly used for oxidative C-H activation.

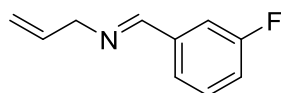

### (*E*)-*N*-allyl-1-(3-fluorophenyl)methanimine (**1i**)

colorless oil. IR: (neat) 3076, 2823, 1648, 1586 cm<sup>-1</sup>; <sup>1</sup>H NMR (500 MHz, d-CDCl<sub>3</sub>) δ 8.27 (s, 1H), 7.47-7.52 (m, 2H), 7.35-7.40 (m, 1H), 7.11 (tdd, *J* = 8.5, 3.0, 1.0 Hz, 1H), 6.02-6.10 (m, 1H), 5.24 (dd, *J* = 17.0, 1.5 Hz, 1H), 5.17 (dd, *J* = 10.0, 1.5 Hz, 1H), 4.26 (dd, *J* = 5.5, 1.5 Hz, 2H). <sup>13</sup>C NMR (125 MHz, d-CDCl<sub>3</sub>) δ 163.2 (d, *J* = 245 Hz), 160.8, 138.7 (d, *J* = 7.1 Hz), 135.8, 130.3 (d, *J* = 7.6 Hz), 124.5, 117.9 (d, *J* = 25.1 Hz), 116.5, 114.4 (d, *J* = 22 Hz), 63.6. HRMS (ESI+) calcd. for C<sub>10</sub>H<sub>10</sub>FN [M+H]<sup>+</sup> 164.0797, found 164.0795.

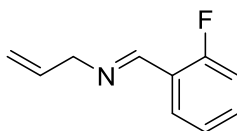

### (*E*)-*N*-allyl-1-(2-fluorophenyl)methanimine (**1j**)

colorless oil. IR: (neat) 3078, 2824, 1650, 1586, 1450 cm<sup>-1</sup>; <sup>1</sup>H NMR (400 MHz, d-CDCl<sub>3</sub>) δ 8.60 (s, 1H), 8.00 (td, *J* = 7.6, 2.0 Hz, 1H), 7.36-7.42 (m, 1H), 7.17 (t, *J* =



7.6 Hz, 1H), 7.07 (dd,  $J = 8.4, 2.0$  Hz, 1H), 6.02-6.11 (m, 1H), 5.23 (dd,  $J = 17.2, 2.0$  Hz, 1H), 5.16 (dd,  $J = 10.4, 1.6$  Hz, 1H), 4.28 (dd,  $J = 6.4, 1.6$  Hz, 2H).  $^{13}\text{C}$  NMR (100 MHz,  $\text{d-CDCl}_3$ )  $\delta$  162.5 (d,  $J = 250.9$  Hz), 155.5 (d,  $J = 4.8$  Hz), 135.9, 132.4 (d,  $J = 8.6$  Hz), 127.9 (d,  $J = 2.9$  Hz), 124.5 (d,  $J = 1.5$  Hz), 124.0, 116.3 (d,  $J = 44.2$  Hz), 115.9, 64.1. HRMS (ESI+) calcd. for  $\text{C}_{10}\text{H}_{10}\text{FN}$   $[\text{M}+\text{H}]$  164.0797, found 164.0799.

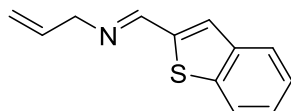

**(*E*)-*N*-allyl-1-(benzo[*b*]thiophen-2-yl)methanimine (1n)**

White solid, mp = 66-67 °C. IR: (neat) 2865, 2816, 1630, 1432  $\text{cm}^{-1}$ ;  $^1\text{H}$  NMR (300 MHz,  $\text{d-CDCl}_3$ )  $\delta$  8.51 (s, 1H), 7.80-7.88 (m, 2H), 7.56 (s, 1H), 7.36-7.44 (m, 2H), 6.04-6.17 (m, 1H), 5.25-5.32 (m, 1H), 5.20-5.24 (m, 1H), 4.32 (dd,  $J = 5.7, 1.5$  Hz, 2H).  $^{13}\text{C}$  NMR (75 MHz,  $\text{d-CDCl}_3$ )  $\delta$  156.1, 142.9, 140.8, 139.5, 135.6, 128.0, 126.3, 124.8, 124.7, 123.0, 116.7, 63.3.

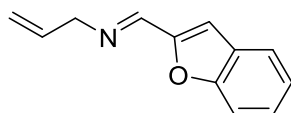

**(*E*)-*N*-allyl-1-(benzofuran-2-yl)methanimine (1o)**

colorless oil. IR: (neat) 3084, 2884, 2821, 1648, 1450  $\text{cm}^{-1}$ ;  $^1\text{H}$  NMR (400 MHz,  $\text{d-CDCl}_3$ )  $\delta$  8.26 (s, 1H), 7.63 (d,  $J = 7.6$  Hz, 1H), 7.57 (d,  $J = 8.0$  Hz, 1H), 7.38 (t,  $J = 8.0$  Hz, 1H), 7.27 (dd,  $J = 8.0, 6.4$  Hz, 1H), 7.07 (s, 1H), 6.06-6.16 (m, 1H), 5.27 (dd,  $J = 17.2, 1.6$  Hz, 1H), 5.20 (dd,  $J = 10.0, 1.6$  Hz, 1H), 4.32 (dd,  $J = 6.0, 1.2$  Hz, 2H).  $^{13}\text{C}$  NMR (100 MHz,  $\text{d-CDCl}_3$ )  $\delta$  155.8, 152.8, 151.2, 135.4, 127.9, 126.7, 123.6, 122.2, 117.1, 112.3, 111.3, 64.1. HRMS (ESI+) calcd. for  $\text{C}_{12}\text{H}_{11}\text{NO}$   $[\text{M}+\text{Na}]$  208.0738, found 208.0733.

Glycinate nucleophiles: Glycinate benzophenone imines were prepared according to reported literatures.<sup>2</sup>



### III. Reaction optimization:

No desired product was observed with phosphoramidite ligands or phosphine ligands in our initial studies as shown in **Figure 1**.

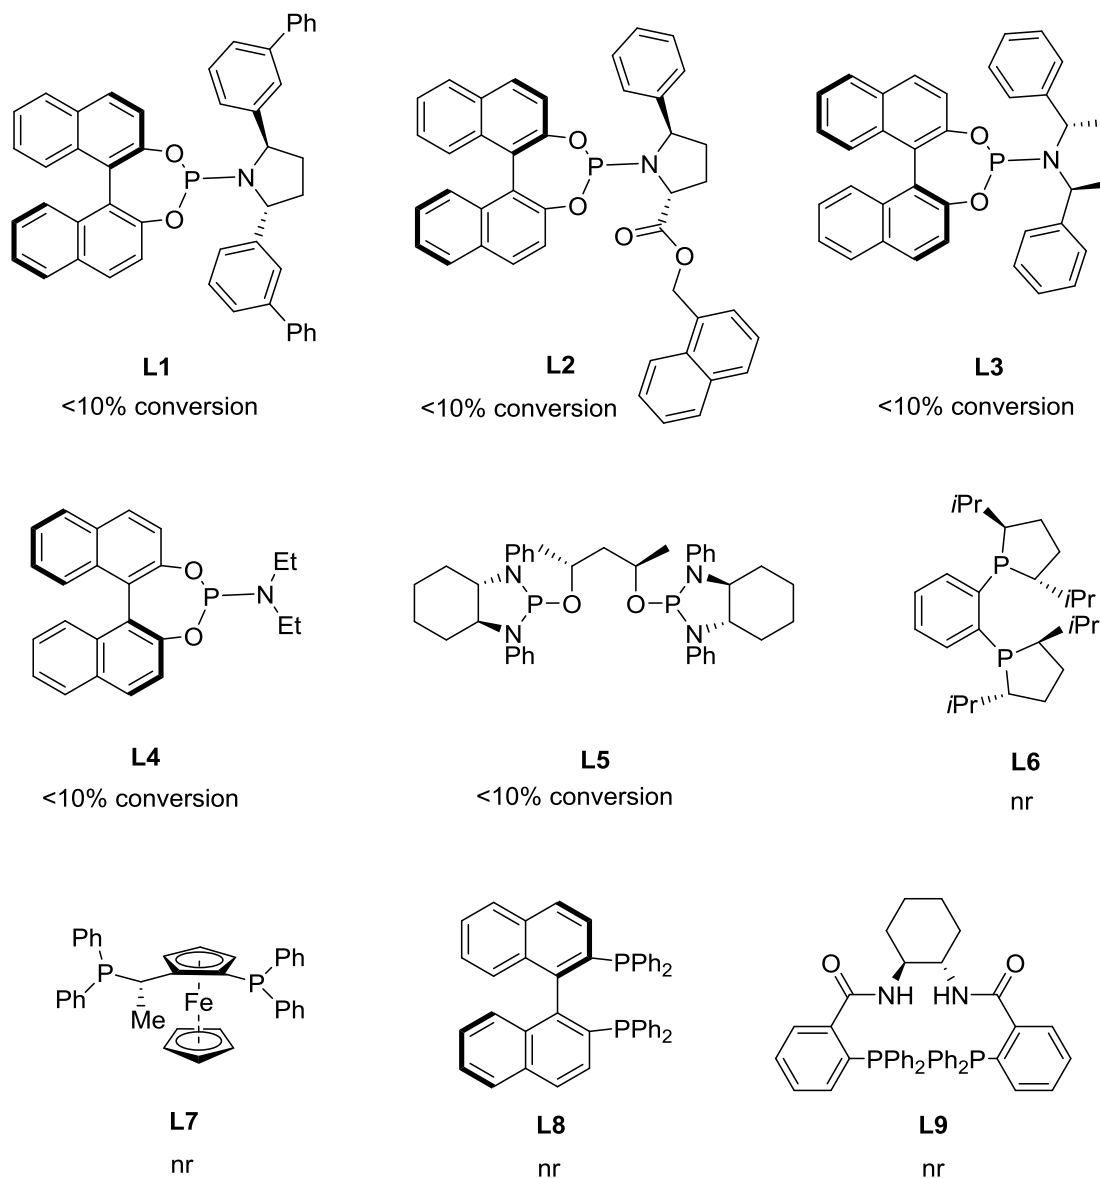

nr = no reaction

**Figure 1.** Initial ligands screening

We were also interested in improving enantioselectivity by varying glycinate nucleophiles. With DIOP as the standard ligand, a number of glycinate nucleophiles were screened (**Figure 2**). In fact, the two halves of the glycinate structure is of paramount importance. Changing from *N*-dibenzylidene glycinate (**2a**) to *N*-benzylidene glycinate (**2e**) resulted in the decrease of enantioselectivity indicating the importance of bulky aromatic imine substitution for maintaining high level of enantio-induction. Moreover,



fine tuning of the ester moiety of glycinate found that the presence of sterically less demanding substituents were beneficial for enantioselectivity. The highest enantioselectivity (85:15 er) was obtained upon using methyl glycinate (**2b**) as the nucleophile. Surprisingly, replacing methyl ester with cyano group (**2b** vs **2g**) resulted in lower enantioselectivity and poor diastereoselectivity. Further study showed that sterically more demanding substituents on imines, such as 3,5-dimethylphenyl or 2-naphthyl groups, did not have significant impact on the enantioselectivity (**2h** and **2i** vs **2b**).

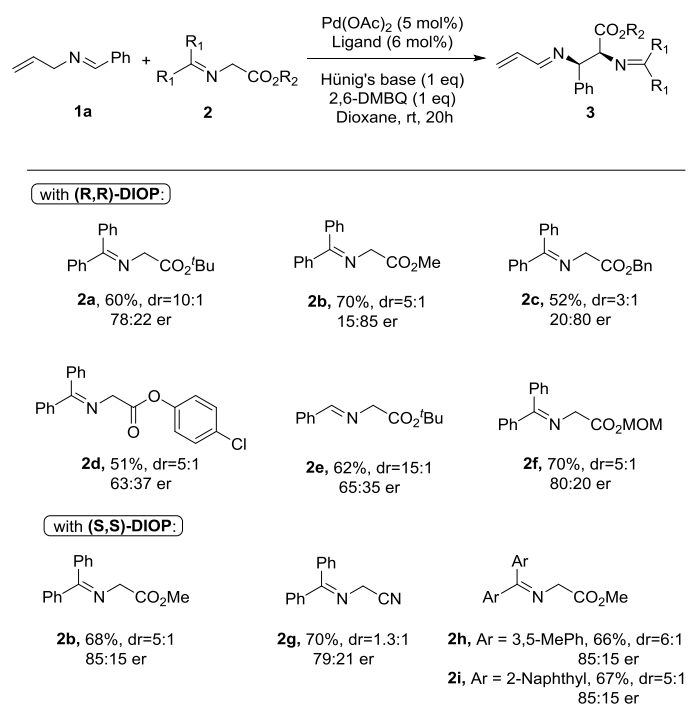

**Figure 2.** Screening of the glycinate

Efforts to improve the enantioselectivity then shifted to examine the solvent effect (**Table 1**) with dioxane being the standard (**Table 1**, entry 1). Shifting to THF and DME, similar ethereal solvents, showed some differences (entries 2 and 3). Notably, DME improved the diastereoselectivity while maintaining yield and enantioselectivity. When the medium was changed to DCM, however, a complex mixture was observed (entry 4). Aromatic solvents turned out to be generally beneficial for this transformation. A slightly higher enantioselectivity was obtained with toluene as the solvent (entry 6, 87:13 er). Importantly, full conversion was maintained. Although xylene and mesitylene were better solvents in terms of enantioselectivity, reaction conversions were typically poor even after a prolonged reaction time (entry 8 and 9). In an attempt to increase the reaction conversion, a combination of toluene and mesitylene (1:1 mixture) was also examined (entry 10). Although similar enantiomeric excess of the product was obtained, no beneficial effect on either the reaction conversion or the diastereoselectivity was observed.



**Table 1.** Solvent screening<sup>a</sup>

| Entry           | Solvent          | Conversion <sup>c</sup> | Yield <sup>b</sup> | dr <sup>c</sup> | er <sup>d</sup> |
|-----------------|------------------|-------------------------|--------------------|-----------------|-----------------|
| 1               | Dioxane          | 100%                    | 70%                | 5:1             | 85:15           |
| 2               | THF              | 100%                    | 65%                | 4:1             | 85:15           |
| 3               | DME              | 100%                    | 68%                | 6:1             | 84:16           |
| 4               | DCM              | 100%                    | messy              | -               | -               |
| 5               | Benzene          | 100%                    | 62%                | 4:1             | 85:15           |
| 6               | Toluene          | 100%                    | 67%                | 5:1             | 87:13           |
| 7               | 2-ClPh           | 100%                    | 61%                | 4:1             | 86:14           |
| 8 <sup>e</sup>  | Xylene           | 52%                     | 35%                | 5:1             | 88:12           |
| 9 <sup>e</sup>  | Mes              | 47%                     | 38%                | 5:1             | 90:10           |
| 10 <sup>e</sup> | Tol/Mes<br>(1:1) | 51%                     | 33%                | 4:1             | 86:14           |

<sup>a</sup>Reaction conditions: **1a** (0.1 mmol), **2b** (0.1 mmol), Pd(OAc)<sub>2</sub> (5 mol%), Ligand (6 mol%), Hunig's base (0.1 mmol), 2,6-DMBQ (0.1 mmol), dioxane, rt, 15-20h. <sup>b</sup>Isolated yield. <sup>c</sup>Determined by <sup>1</sup>H-NMR. <sup>d</sup>Determined by chiral HPLC. <sup>e</sup>40h.

With toluene as the most effective solvent for this reaction, other reaction parameters, such as temperature and concentration, were further examined (**Table 2**). The reaction was sensitive to temperature. Lowering the temperature from room temperature to 4°C, higher diastereoselectivity and enantioselectivity was observed (entry 2), at the expense of conversion. Increasing the concentration to 0.5 M provided **3b** in 49% conversion (entry 3). At 0.8 M and 1.0 M, the reaction also proceeded to 50% conversion, although the isolated yield decreased (entry 4 and 5). Notably in those cases, the enantiomeric excess of the product was maintained (90:10 er). Although this seemed a promising line of inquiry, prolonging the reaction time while maintaining this relatively high reaction concentration of 0.8 M did not significantly improve the isolated yield of **3b** but the diastereoselectivity decreased (entry 6). The asymmetric allylic alkylation proceeded with almost complete conversion after 70h, and afforded **3b** in 58% yield and 89:11 er (entry 7).

**Table 2.** Temperature and concentration optimization<sup>a</sup>

| Entry | Temp <sup>t</sup><br>& concn | Conver <sup>c</sup> | Yield <sup>b</sup> | dr <sup>c</sup> | er <sup>d</sup> |
|-------|------------------------------|---------------------|--------------------|-----------------|-----------------|
| 1     | rt, 0.3M                     | 100%                | 67%                | 5:1             | 87:13           |



|                |           |     |     |     |       |
|----------------|-----------|-----|-----|-----|-------|
| 2              | 4°C, 0.3M | 32% | 25% | 9:1 | 90:10 |
| 3              | 4°C, 0.5M | 49% | 40% | 8:1 | 90:10 |
| 4              | 4°C, 0.8M | 50% | 36% | 8:1 | 89:11 |
| 5              | 4°C, 1.0M | 52% | 32% | 8:1 | 89:11 |
| 6 <sup>e</sup> | 4°C, 0.8M | 88% | 54% | 5:1 | 89:11 |
| 7 <sup>e</sup> | 4°C, 0.5M | 95% | 58% | 5:1 | 89:11 |

<sup>a</sup>Reaction conditions: **1a** (0.1 mmol), **2b** (0.1 mmol), Pd(OAc)<sub>2</sub> (5 mol%), Ligand (6 mol%), Hunig's base (0.1 mmol), 2,6-DMBQ (0.1 mmol), dioxane, rt, 15-20h. <sup>b</sup>Isolated yield. <sup>c</sup>Determined by <sup>1</sup>H-NMR. <sup>d</sup>Determined by chiral HPLC. <sup>e</sup>70h.

We examined this transformation with a variety of secondary and tertiary amines (**Table 3**). Triethylamine (entry 2) were remarkably more effective than *N,N*-diisopropylethyl amine (entry 1) giving the desired product in 65% yield and 90:10 er with full conversion. When *N*-methylpyrrolidine (entry 3), an amine that, with two conformationally-restricted substituents, has less steric bulk than either triethylamine or *N,N*-diisopropylethylamine was employed, **3b** was obtained in 85% conversion and 87:13 er. A collection of secondary amines were also examined. With diisopropylamine, the reaction progressed to 80% and produced **3b** in 51% yield (NMR, entry 4). No conversion was observed with morpholine as the base (entry 5). When pyridine was employed, low conversion was obtained (entry 6). No desired product was observed when either DBU (entry 7) or inorganic base, K<sub>2</sub>CO<sub>3</sub> (entry 8), were tested. These results suggest the steric demands, rather than the electronics or basicity of the amine, are crucial to both catalyst turnover and enantioinduction.

**Table 3.** Bases screening<sup>a</sup>

| Entry | Base                           | Conversion <sup>c</sup> | Yield <sup>b</sup> | dr <sup>c</sup> | er <sup>d</sup> |
|-------|--------------------------------|-------------------------|--------------------|-----------------|-----------------|
| 1     | <i>i</i> Pr <sub>2</sub> NEt   | 70%                     | 45%                | 5:1             | 90:10           |
| 2     | Et <sub>3</sub> N              | 100%                    | 65%                | 6:1             | 90:10           |
| 3     | <i>N</i> -Me<br>Pyrrolidine    | 85%                     | 55%                | 3:1             | 87:13           |
| 4     | <i>i</i> Pr <sub>2</sub> NH    | 80%                     | 51%                | 5:1             | 90:10           |
| 5     | Morpholine                     | trace                   | -                  | -               | -               |
| 6     | Pyridine                       | 30%                     | 19%                | 5:1             | 89:11           |
| 7     | DBU                            | 100%                    | trace              | -               | -               |
| 8     | K <sub>2</sub> CO <sub>3</sub> | 61%                     | trace              | -               | -               |



<sup>a</sup>Reaction conditions: **1a** (0.1 mmol), **2b** (0.1 mmol), Pd(OAc)<sub>2</sub> (5 mol%), Ligand (6 mol%), Hunig's base (0.1 mmol), 2,6-DMBQ (0.1 mmol), dioxane, rt, 15-20h. <sup>b</sup>Isolated yield. <sup>c</sup>Determined by <sup>1</sup>H-NMR. <sup>d</sup>Determined by chiral HPLC.

**DIOP ligands:** DIOP ligands were prepared according to established procedures.<sup>3</sup>

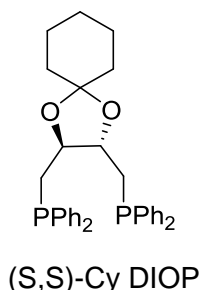

**(2S,3S)-2,3-bis((diphenylphosphaneyl)methyl)-1,4-dioxaspiro[4.5]decane<sup>3c</sup>**

White solid, mp = 86-88 °C.  $\alpha_D^{25} = +25.2$  ( $c = 2.0$ , CHCl<sub>3</sub>). <sup>1</sup>H NMR (500 MHz, d-CDCl<sub>3</sub>)  $\delta$  7.43-7.48 (m, 8H), 7.33-7.36 (m, 12H), 3.98-4.01 (m, 2H), 2.37-2.46 (m, 4H), 1.57-1.60 (m, 4H), 1.44-1.54 (m, 4H), 1.33 (q,  $J = 6.0$  Hz, 2H). <sup>13</sup>C NMR (125 MHz, d-CDCl<sub>3</sub>)  $\delta$  138.8 (dd,  $J = 15.6, 12.5$  Hz), 133.0 (dd,  $J = 19.1, 8.3$  Hz), 128.5-128.8 (m), 109.6, 79.5 (dd,  $J = 14.8, 8.0$  Hz), 37.0, 32.6, 32.5, 25.3, 24.0. <sup>31</sup>P NMR (161 MHz, d-CDCl<sub>3</sub>)  $\delta$  -21.6 ppm.

**IV. General method for asymmetric allylic alkylations:**

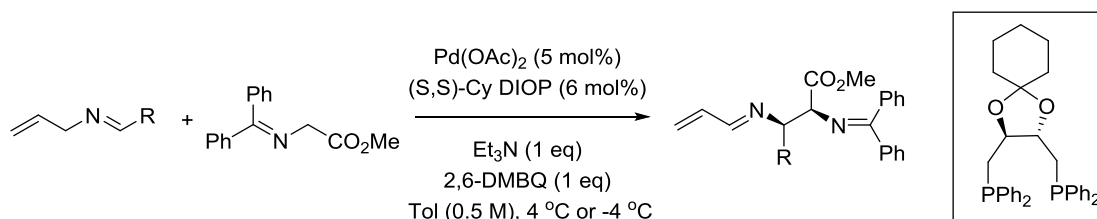

General procedure for the Pd-catalyzed asymmetric allylic alkylation involving  $\pi$ -allyl intermediate: An oven dried Pyrex microwave vial was charged with Pd(OAc)<sub>2</sub> (5.6 mg, 0.025 mmol), (S,S)-Cy DIOP (16.2 mg, 0.03 mmol), 2,6-dimethylbenzoquinone (70 mg, 0.5 mmol) and was sealed with a rubber septa. The vial was evacuated and filled with nitrogen three times in an interval of 10 min. In a separate sealed nitrogen flushed vial, glycinate (0.5 mmol) and *N*-allyl imine (0.5 mmol) were taken in freshly distilled toluene (1 ml). The solution was cannulated to the microwave vial with



palladium catalyst. Et<sub>3</sub>N (50 mg, 0.5 mmol) was added to the resulting turbid solution and was allowed to stir at 4 °C or -4 °C for 35-60h. Upon completion (monitored by crude NMR), solvent was removed in vacuo and the residue was purified by flash chromatography over silica gel (pre-neutralized with 3% Et<sub>3</sub>N in Hexanes), eluting with EtOAc / hexanes/ Et<sub>3</sub>N, to give the product.

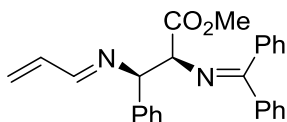

**Methyl (2S,3R)-3-(((E)-allylidene)amino)-2-((diphenylmethylene)amino)-3-phenyl propanoate (3b)**

The reaction was performed with *N*-allyl imine (72.5 mg, 0.5 mmol), methyl glycinate (126 mg, 0.5 mmol), Pd(OAc)<sub>2</sub> (5.6 mg, 0.025 mmol), (S,S)-Cy DIOP (16.2 mg, 0.03 mmol), 2,6-dimethylbenzoquinone (70 mg, 0.5 mmol) and Et<sub>3</sub>N (50 mg, 0.5 mmol) in toluene (1.0 mL) for 36 h at 4°C. After removing the solvent, purification by flash chromatography (EtOAc / hexanes /Et<sub>3</sub>N = 5/95/1) gave product (129 mg, 65%) as a colorless oil.  $\alpha_D^{25} = -33.7$  ( $c = 1.0$ , CHCl<sub>3</sub>). IR: (neat) 3017, 2936, 1708, 1622, 1599, 1348 cm<sup>-1</sup>; <sup>1</sup>H NMR (500 MHz, d-CDCl<sub>3</sub>)  $\delta$  8.06 (d,  $J = 9.0$  Hz, 1H), 7.61 (dd,  $J = 8.5$ , 1.5 Hz, 2H), 7.45-7.47 (m, 3H), 7.39-7.42 (m, 1H), 7.32-7.35 (m, 4H), 7.27-7.29 (m, 2H), 7.23-7.25 (m, 1H), 7.08-7.10 (m, 2H), 6.51-6.58 (m, 1H), 5.73 (d,  $J = 10.5$  Hz, 1H), 5.67 (d,  $J = 17.5$  Hz, 1H), 4.91 (d,  $J = 8.0$  Hz, 1H), 4.58 (d,  $J = 8.0$  Hz, 1H), 3.54 (s, 3H). <sup>13</sup>C NMR (125 MHz, CDCl<sub>3</sub>)  $\delta$  172.3, 170.9, 164.7, 140.2, 139.8, 137.1, 136.5, 130.6, 129.1, 128.9, 128.6, 128.5, 128.3, 128.3, 128.2, 127.9, 127.8, 78.0, 72.0, 52.2. HRMS (ESI+) calcd. for C<sub>26</sub>H<sub>24</sub>N<sub>2</sub>O<sub>2</sub> [M+Na] 419.1736, found 419.1723.

Enantiomeric excess was determined by using HPLC with a chiral stationary phase. Stationary phase (AD column, flow rate = 1.0 mL/min, eluent: Hept/*i*-PrOH/Et<sub>3</sub>N = 100/1/0.1, 254 nm absorbance). Major enantiomer (t<sub>R</sub> = 34.4 min), minor enantiomer (t<sub>R</sub> = 39.0 min): er = 92:8.



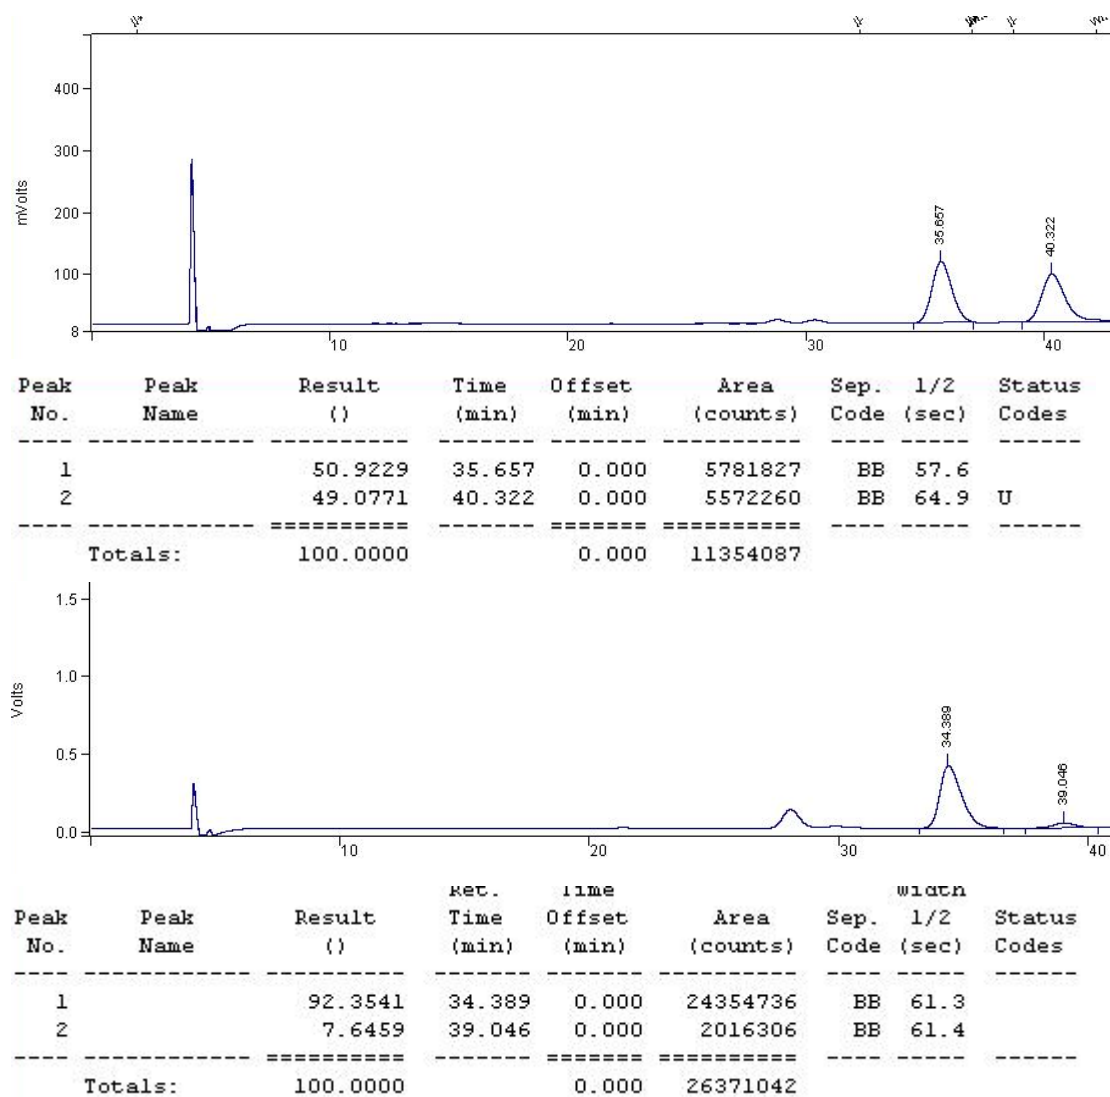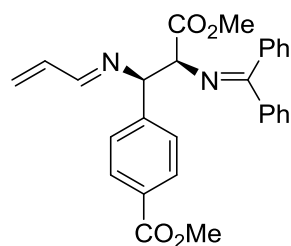

**Methyl 4-((1R,2S)-1-(((E)-allylidene)amino)-2-((diphenylmethylene)amino)-3-methoxy-3-oxopropyl)benzoate (3c)**

The reaction was performed with *N*-allyl imine (101.6 mg, 0.5 mmol), methyl glycinate (126 mg, 0.5 mmol), Pd(OAc)<sub>2</sub> (5.6 mg, 0.025 mmol), (S,S)-Cy DIOP (16.2 mg, 0.03 mmol), 2,6-dimethylbenzoquinone (70 mg, 0.5 mmol) and Et<sub>3</sub>N (50 mg, 0.5 mmol) in toluene (1.0 mL) for 40 h at -4°C. After removing the solvent, purification by flash



chromatography (EtOAc / hexanes /Et<sub>3</sub>N = 10/90/1) gave product (170 mg, 75%) as a colorless oil.  $\alpha_D^{25} = -85.7$  ( $c = 1.0$ , CHCl<sub>3</sub>). IR: (neat) 3058, 2951, 1723, 1611, 1435 cm<sup>-1</sup>; <sup>1</sup>H NMR (500 MHz, d-CDCl<sub>3</sub>)  $\delta$  8.02 (d,  $J = 9.0$  Hz, 1H), 7.93 (d,  $J = 8.5$  Hz, 2H), 7.57 (d,  $J = 8.5$  Hz, 2H), 7.42-7.44 (m, 3H), 7.36-7.40 (m, 3H), 7.29-7.32 (m, 2H), 7.03-7.05 (m, 2H), 6.48-6.56 (m, 1H), 5.73 (d,  $J = 10.5$  Hz, 1H), 5.66 (d,  $J = 17.5$  Hz, 1H), 4.93 (d,  $J = 7.5$  Hz, 1H), 4.53 (d,  $J = 7.5$  Hz, 1H), 3.87 (s, 3H), 3.51 (s, 3H). <sup>13</sup>C NMR (125 MHz, CDCl<sub>3</sub>)  $\delta$  172.6, 170.6, 167.1, 165.2, 145.4, 139.6, 137.0, 136.3, 130.7, 129.8, 129.5, 129.1, 128.9, 128.6, 128.3, 128.2, 128.1, 128.1, 77.5, 71.2, 52.3. HRMS (ESI+) calcd. for C<sub>28</sub>H<sub>26</sub>N<sub>2</sub>O<sub>4</sub> [M+Na] 477.1790, found 477.1771.

Enantiomeric excess was determined by using HPLC with a chiral stationary phase. Stationary phase (AD column, flow rate = 1.0 mL/min, eluent: Hept/*i*-PrOH/Et<sub>3</sub>N = 20/1/0.1, 254 nm absorbance). Major enantiomer (t<sub>R</sub> = 18.1 min), minor enantiomer (t<sub>R</sub> = 28.7 min): er = 92:8.

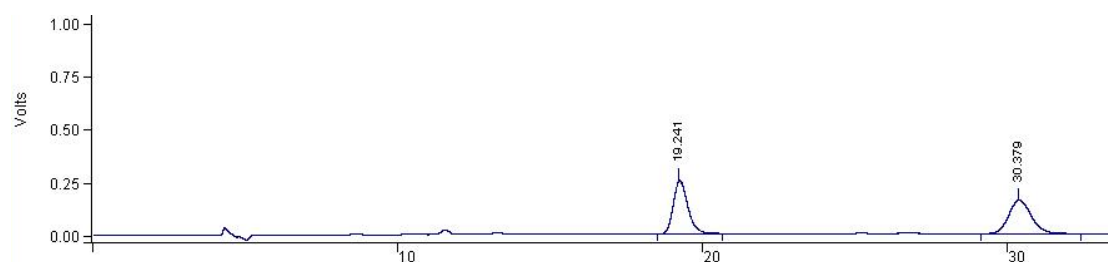

| Peak No. | Peak Name | Result ( ) | Ret. Time (min) | Time Offset (min) | Area (counts) | Sep. Code | Width 1/2 (sec) | Status Codes |
|----------|-----------|------------|-----------------|-------------------|---------------|-----------|-----------------|--------------|
| 1        |           | 50.8642    | 19.241          | 0.000             | 8371189       | BB        | 30.8            |              |
| 2        |           | 49.1358    | 30.379          | 0.000             | 8086733       | BB        | 47.5            |              |
| Totals:  |           | 100.0000   |                 | 0.000             | 16457922      |           |                 |              |

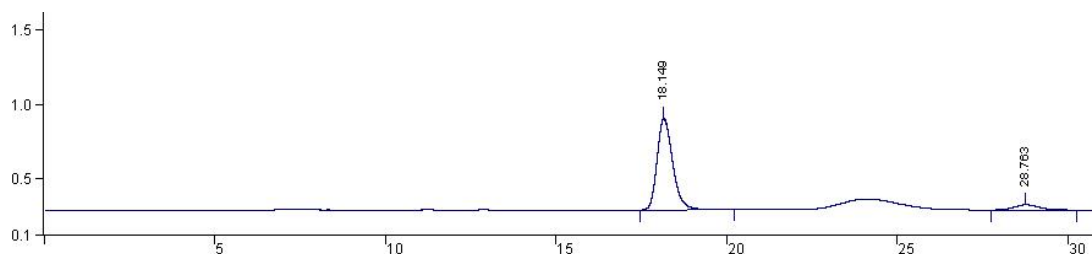



| Peak No. | Peak Name | Result ( ) | Ret. Time (min) | Time Offset (min) | Area (counts) | Sep. Code | Width 1/2 (sec) | Status Codes |
|----------|-----------|------------|-----------------|-------------------|---------------|-----------|-----------------|--------------|
| 1        |           | 92.0109    | 18.149          | 0.000             | 19624650      | BB        | 29.3            |              |
| 2        |           | 7.9891     | 28.763          | 0.000             | 1703957       | BB        | 45.3            |              |
| Totals:  |           | 100.0000   |                 | 0.000             | 21328607      |           |                 |              |

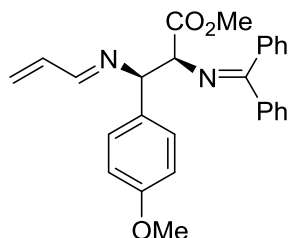

**Methyl (2S,3R)-3-(((E)-allylidene)amino)-2-((diphenylmethylene)amino)-3-(4-methoxyphenyl)propanoate (3d)**

The reaction was performed with *N*-allyl imine (87.6 mg, 0.5 mmol), methyl glycinate (126 mg, 0.5 mmol), Pd(OAc)<sub>2</sub> (5.6 mg, 0.025 mmol), (S,S)-Cy DIOP (16.2 mg, 0.03 mmol), 2,6-dimethylbenzoquinone (70 mg, 0.5 mmol) and Et<sub>3</sub>N (50 mg, 0.5 mmol) in toluene (1.0 mL) for 40 h at 4°C. After removing the solvent, purification by flash chromatography (EtOAc / hexanes / Et<sub>3</sub>N = 5/95/1) gave product (149 mg, 70%) as a colorless oil.  $\alpha_D^{25} = -51.6$  ( $c = 2.0$ , CHCl<sub>3</sub>). IR: (neat) 3059, 2950, 1741, 1611, 1511 cm<sup>-1</sup>; <sup>1</sup>H NMR (500 MHz, d-CDCl<sub>3</sub>)  $\delta$  7.98 (d,  $J = 9.0$  Hz, 1H), 7.55 (d,  $J = 8.5$  Hz, 2H), 7.41-7.43 (m, 3H), 7.34-7.37 (m, 1H), 7.28-7.32 (m, 2H), 7.20 (d,  $J = 9.0$  Hz, 2H), 7.06-7.08 (m, 2H), 6.77 (d,  $J = 8.5$  Hz, 2H), 6.43-6.50 (m, 1H), 5.67 (d,  $J = 10.0$  Hz, 1H), 5.62 (d,  $J = 17.0$  Hz, 1H), 4.80 (d,  $J = 8.0$  Hz, 1H), 4.50 (d,  $J = 8.0$  Hz, 1H), 3.73 (s, 3H), 3.50 (s, 3H). <sup>13</sup>C NMR (125 MHz, CDCl<sub>3</sub>)  $\delta$  172.2, 171.0, 164.4, 159.1, 139.9, 137.2, 136.5, 132.3, 130.6, 129.3, 129.1, 128.9, 128.6, 128.3, 128.2, 127.8, 113.9, 77.4, 72.1, 55.4, 52.2. HRMS (ESI+) calcd. for C<sub>27</sub>H<sub>26</sub>N<sub>2</sub>O<sub>3</sub> [M+Na] 449.1841, found 449.1834.

Enantiomeric excess was determined by using HPLC with a chiral stationary phase. Stationary phase (AD column, flow rate = 1.0 mL/min, eluent: Hept/*i*-PrOH/Et<sub>3</sub>N = 20/1/0.1, 254 nm absorbance). Major enantiomer (t<sub>R</sub> = 14.6 min), minor enantiomer (t<sub>R</sub> = 22.5 min): er = 89.5 :10.5.



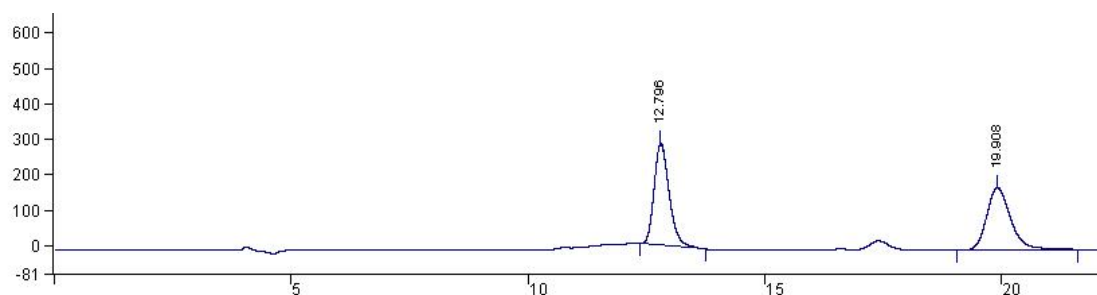

| Peak No. | Peak Name | Result ( ) | Ret. Time (min) | Time Offset (min) | Area (counts) | Sep. Code | Width 1/2 (sec) | Status Codes |
|----------|-----------|------------|-----------------|-------------------|---------------|-----------|-----------------|--------------|
| 1        |           | 50.6349    | 12.796          | 0.000             | 6383686       | BB        | 19.7            |              |
| 2        |           | 49.3651    | 19.908          | 0.000             | 6223598       | BB        | 31.5            |              |
| Totals:  |           | 100.0000   |                 | 0.000             | 12607284      |           |                 |              |

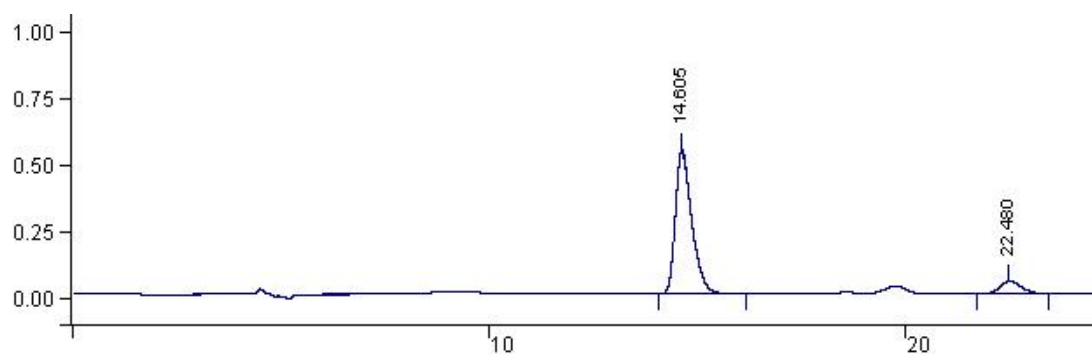

| Peak No. | Peak Name | Result ( ) | Ret. Time (min) | Time Offset (min) | Area (counts) | Sep. Code | Width 1/2 (sec) | Status Codes |
|----------|-----------|------------|-----------------|-------------------|---------------|-----------|-----------------|--------------|
| 1        |           | 89.4952    | 14.605          | 0.000             | 14988652      | BB        | 24.9            |              |
| 2        |           | 10.5048    | 22.480          | 0.000             | 1759343       | BB        | 33.8            |              |
| Totals:  |           | 100.0000   |                 | 0.000             | 16747995      |           |                 |              |

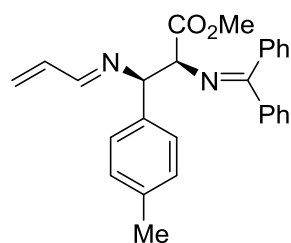

**Methyl (2S,3R)-3-(((E)-allylidene)amino)-2-((diphenylmethylene)amino)-3-(4-methylphenyl)propanoate (3e)**

The reaction was performed with *N*-allyl imine (87.6 mg, 0.5 mmol), methyl glycinate (126 mg, 0.5 mmol), Pd(OAc)<sub>2</sub> (5.6 mg, 0.025 mmol), (S,S)-Cy DIOP (16.2 mg, 0.03 mmol), 2,6-dimethylbenzoquinone (70 mg, 0.5 mmol) and Et<sub>3</sub>N (50 mg, 0.5 mmol) in



toluene (1.0 mL) for 40 h at 4°C. After removing the solvent, purification by flash chromatography (EtOAc / hexanes /Et<sub>3</sub>N = 5/95/1) gave product (127 mg, 62%) as a colorless oil.  $\alpha_D^{25} = -55.2$  ( $c = 1.0$ , CHCl<sub>3</sub>). IR: (neat) 3056, 3026, 1742, 1645, 1621, 1446 cm<sup>-1</sup>; <sup>1</sup>H NMR (400 MHz, d-CDCl<sub>3</sub>)  $\delta$  8.01 (d,  $J = 8.8$  Hz, 1H), 7.57 (d,  $J = 8.0$  Hz, 2H), 7.42-7.44 (m, 3H), 7.35-7.38 (m, 1H), 7.28-7.33 (m, 2H), 7.18 (d,  $J = 8.4$  Hz, 2H), 7.04-7.10 (m, 4H), 6.45-6.54 (m, 1H), 5.68 (d,  $J = 10.0$  Hz, 1H), 5.63 (d,  $J = 17.2$  Hz, 1H), 4.84 (d,  $J = 8.0$  Hz, 1H), 4.54 (d,  $J = 8.0$  Hz, 1H), 3.52 (s, 3H), 2.27 (s, 3H). <sup>13</sup>C NMR (125 MHz, CDCl<sub>3</sub>)  $\delta$  172.2, 171.0, 164.5, 139.9, 137.3, 137.2, 137.1, 136.5, 130.5, 129.2, 129.1, 128.8, 128.5, 128.3, 128.1, 128.1, 127.8, 77.7, 72.1, 52.1, 21.3. HRMS (ESI+) calcd. for C<sub>27</sub>H<sub>26</sub>N<sub>2</sub>O<sub>2</sub> [M+Na] 433.1881, found 433.1886.

Enantiomeric excess was determined by using HPLC with a chiral stationary phase. Stationary phase (AD column, flow rate = 1.0 mL/min, eluent: Hept/*i*-PrOH/Et<sub>3</sub>N = 20/1/0.1, 254 nm absorbance). Major enantiomer (tR = 9.5 min), minor enantiomer (tR = 12.2 min): er = 86 :14.

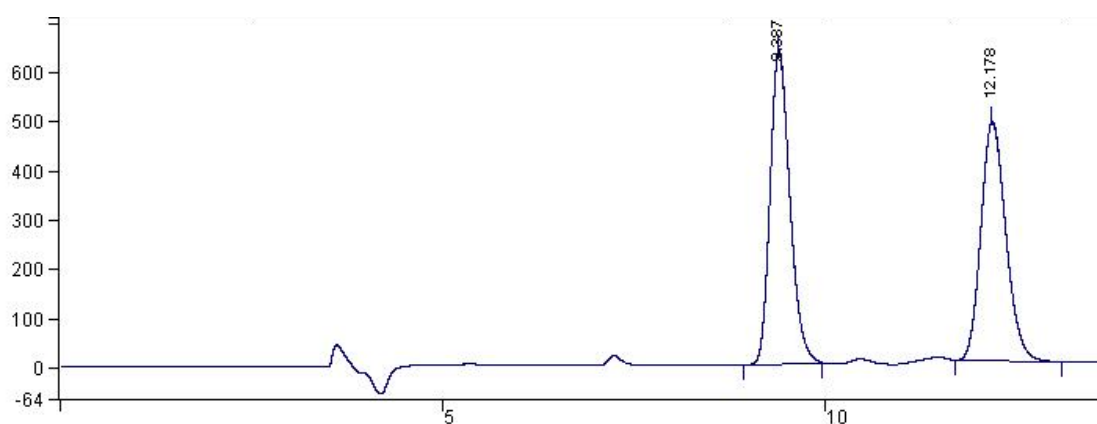

| Peak No. | Peak Name | Result ( ) | Ret. Time (min) | Time Offset (min) | Area (counts) | Sep. Code | Width 1/2 (sec) | Status Codes |
|----------|-----------|------------|-----------------|-------------------|---------------|-----------|-----------------|--------------|
| 1        |           | 50.9612    | 9.387           | 0.000             | 11516488      | BB        | 16.5            |              |
| 2        |           | 49.0388    | 12.178          | 0.000             | 11082073      | BB        | 20.8            |              |
| Totals:  |           | 100.0000   |                 | 0.000             | 22598561      |           |                 |              |



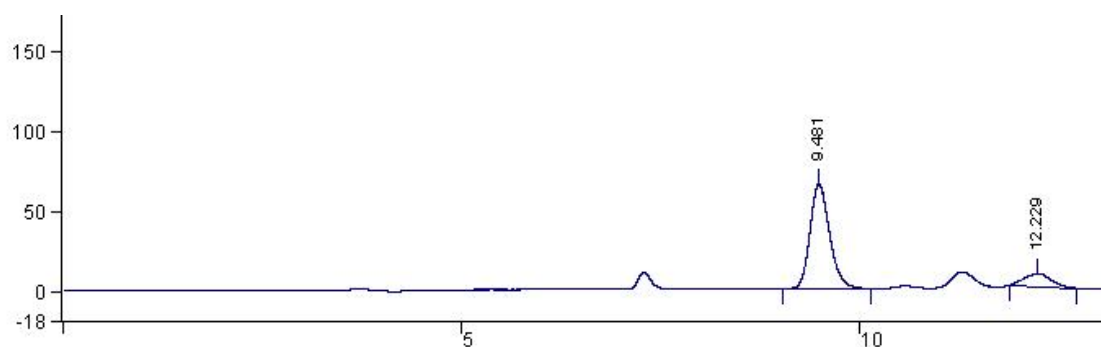

| Peak No. | Peak Name | Result ( ) | Ret. Time (min) | Time Offset (min) | Area (counts) | Sep. Code | Width 1/2 (sec) | Status Codes |
|----------|-----------|------------|-----------------|-------------------|---------------|-----------|-----------------|--------------|
| 1        |           | 86.3748    | 9.481           | 0.000             | 1127036       | BB        | 15.5            |              |
| 2        |           | 13.6252    | 12.229          | 0.000             | 177784        | BB        | 20.6            |              |
| Totals:  |           | 100.0000   |                 | 0.000             | 1304820       |           |                 |              |

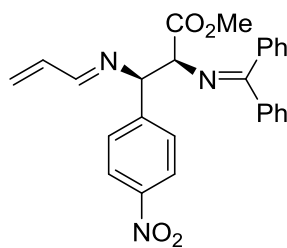

**Methyl (2S,3R)-3-(((E)-allylidene)amino)-2-((diphenylmethylene)amino)-3-(4-nitrophenyl)propanoate (3f)**

The reaction was performed with *N*-allyl imine (95.1 mg, 0.5 mmol), methyl glycinate (126 mg, 0.5 mmol), Pd(OAc)<sub>2</sub> (5.6 mg, 0.025 mmol), (S,S)-Cy DIOP (16.2 mg, 0.03 mmol), 2,6-dimethylbenzoquinone (70 mg, 0.5 mmol) and Et<sub>3</sub>N (50 mg, 0.5 mmol) in toluene (1.0 mL) for 72 h at -20°C. After removing the solvent, purification by flash chromatography (EtOAc / hexanes / Et<sub>3</sub>N = 5/95/1) gave product (154 mg, 70%) as a colorless oil.  $\alpha_D^{25} = -77.1$  ( $c = 1.0$ , CHCl<sub>3</sub>). IR: (neat) 3057, 1741, 1646, 1599, 1521 cm<sup>-1</sup>; <sup>1</sup>H NMR (500 MHz, d-CDCl<sub>3</sub>) major diastereomer:  $\delta$  8.10 (d,  $J = 9.0$  Hz, 2H), 8.00 (d,  $J = 8.5$  Hz, 1H), 7.54 (d,  $J = 9.0$  Hz, 2H), 7.50 (d,  $J = 9.0$  Hz, 2H), 7.42-7.43 (m, 3H), 7.34-7.37 (m, 1H), 7.27-7.30 (m, 2H), 7.04-7.06 (m, 2H), 6.44-6.52 (m, 1H), 5.72 (d,  $J = 10.0$  Hz, 1H), 5.66 (d,  $J = 17.0$  Hz, 1H), 4.91 (d,  $J = 8.0$  Hz, 1H), 4.33 (d,  $J = 8.0$  Hz, 1H), 3.54 (s, 3H). minor diastereomer:  $\delta$  8.08 (d,  $J = 9.0$  Hz, 2H), 8.03 (d,  $J = 8.5$  Hz, 1H), 7.68 (d,  $J = 9.0$  Hz, 2H), 7.62 (d,  $J = 8.5$  Hz, 2H), 7.42-7.47 (m, 3H), 7.36-7.37 (m, 1H), 7.27-7.30 (m, 2H), 7.04-7.06 (m, 2H), 6.42-6.47 (m, 1H), 5.83 (d,  $J$



= 10.0 Hz, 1H), 5.75 (d,  $J$  = 17.0 Hz, 1H), 5.03 (d,  $J$  = 8.5 Hz, 1H), 4.63 (d,  $J$  = 8.5 Hz, 1H), 3.70 (s, 3H).  $^{13}\text{C}$  NMR (125 MHz,  $\text{CDCl}_3$ )  $\delta$  173.0, 170.4, 165.6, 147.8, 147.5, 139.4, 136.8, 136.2, 130.9, 129.3, 129.1, 128.9, 128.7, 128.3, 128.2, 128.1, 123.7, 77.0, 71.6, 52.4. HRMS (ESI+) calcd. for  $\text{C}_{26}\text{H}_{23}\text{N}_3\text{O}_4$   $[\text{M}+\text{Na}]$  464.1586, found 464.1578.

Enantiomeric excess was determined by using HPLC with a chiral stationary phase. Stationary phase (AD column, flow rate = 1.0 mL/min, eluent: Hept/*i*-PrOH/ $\text{Et}_3\text{N}$  = 20/1/0.1, 254 nm absorbance). Major enantiomer ( $t_R$  = 21.3 min), minor enantiomer ( $t_R$  = 30.5 min): er = 90 :10.

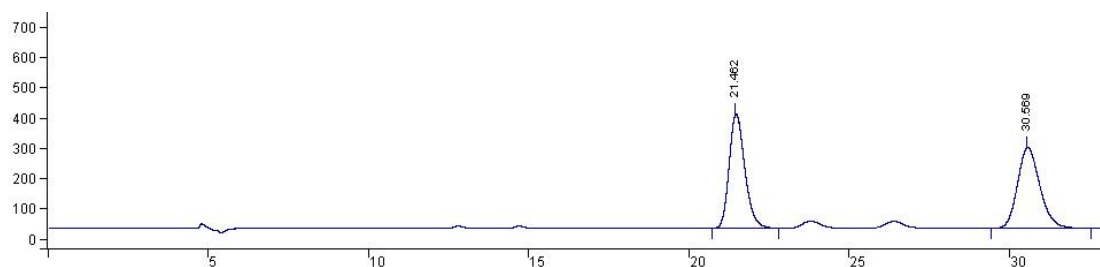

| Peak No. | Peak Name | Result ( ) | Ret. Time (min) | Time Offset (min) | Area (counts) | Sep. Code | Width 1/2 (sec) | Status Codes |
|----------|-----------|------------|-----------------|-------------------|---------------|-----------|-----------------|--------------|
| 1        |           | 50.0223    | 21.462          | 0.000             | 12900804      | BB        | 31.8            |              |
| 2        |           | 49.9777    | 30.569          | 0.000             | 12889284      | BB        | 44.5            |              |
| Totals:  |           | 100.0000   |                 | 0.000             | 25790088      |           |                 |              |

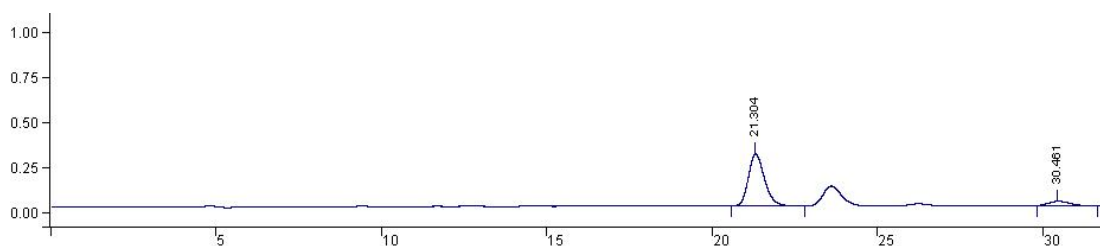

| Peak No. | Peak Name | Result ( ) | Ret. Time (min) | Time Offset (min) | Area (counts) | Sep. Code | Width 1/2 (sec) | Status Codes |
|----------|-----------|------------|-----------------|-------------------|---------------|-----------|-----------------|--------------|
| 1        |           | 90.3347    | 21.304          | 0.000             | 9881343       | BB        | 31.8            |              |
| 2        |           | 9.6653     | 30.461          | 0.000             | 1057248       | BB        | 40.6            |              |
| Totals:  |           | 100.0000   |                 | 0.000             | 10938591      |           |                 |              |



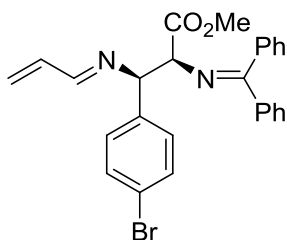

**Methyl (2S,3R)-3-(((E)-allylidene)amino)-2-((diphenylmethylene)amino)-3-(4-bromophenyl)propanoate (3g)**

The reaction was performed with *N*-allyl imine (111.0 mg, 0.5 mmol), methyl glycinate (126 mg, 0.5 mmol), Pd(OAc)<sub>2</sub> (5.6 mg, 0.025 mmol), (S,S)-Cy DIOP (16.2 mg, 0.03 mmol), 2,6-dimethylbenzoquinone (70 mg, 0.5 mmol) and Et<sub>3</sub>N (50 mg, 0.5 mmol) in toluene (1.0 mL) for 42 h at -4 °C. After removing the solvent, purification by flash chromatography (EtOAc / hexanes / Et<sub>3</sub>N = 5/95/1) gave product (200 mg, 84%) as a colorless oil.  $\alpha_D^{25} = -102$  ( $c = 3.0$ , CHCl<sub>3</sub>). IR: (neat) 3057, 2950, 1742, 1621, 1487, 1446 cm<sup>-1</sup>; <sup>1</sup>H NMR (500 MHz, d-CDCl<sub>3</sub>)  $\delta$  8.02 (d,  $J = 9.0$  Hz, 1H), 7.59 (d,  $J = 9.0$  Hz, 2H), 7.43-7.47 (m, 4H), 7.36-7.38 (m, 1H), 7.29-7.34 (m, 3H), 7.24-7.25 (m, 1H), 7.11 (d,  $J = 8.0$  Hz, 1H), 7.02-7.05 (m, 2H), 6.48-6.55 (m, 1H), 5.73 (d,  $J = 10.0$  Hz, 1H), 5.66 (d,  $J = 17.0$  Hz, 1H), 4.85 (d,  $J = 8.0$  Hz, 1H), 4.51 (d,  $J = 8.0$  Hz, 1H), 3.56 (s, 3H). <sup>13</sup>C NMR (125 MHz, CDCl<sub>3</sub>)  $\delta$  172.6, 170.7, 165.2, 142.6, 139.6, 137.0, 136.3, 131.6, 131.3, 130.8, 130.0, 129.1, 129.0, 128.6, 128.1, 126.9, 122.5, 77.1, 71.7, 52.3. HRMS (ESI+) calcd. for C<sub>26</sub>H<sub>23</sub>BrN<sub>2</sub>O<sub>2</sub> [M+H] 475.1013, found 475.1016.

Enantiomeric excess was determined by using HPLC with a chiral stationary phase. Stationary phase (AD column, flow rate = 1.0 mL/min, eluent: Hept/*i*-PrOH/Et<sub>3</sub>N = 150/1/0.1, 254 nm absorbance). Major enantiomer (t<sub>R</sub> = 45.2 min), minor enantiomer (t<sub>R</sub> = 48.0 min): er = 90 :10.

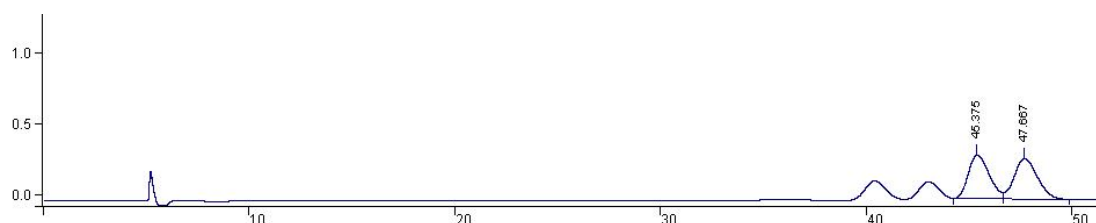



| Peak No. | Peak Name | Result ( ) | Ret. Time (min) | Time Offset (min) | Area (counts) | Sep. Code | Width 1/2 (sec) | Status Codes |
|----------|-----------|------------|-----------------|-------------------|---------------|-----------|-----------------|--------------|
| 1        |           | 49.1020    | 45.375          | 0.000             | 21620838      | BV        | 72.0            |              |
| 2        |           | 50.8980    | 47.667          | 0.000             | 22411654      | VB        | 76.7            |              |
| Totals:  |           | 100.0000   |                 | 0.000             | 44032492      |           |                 |              |

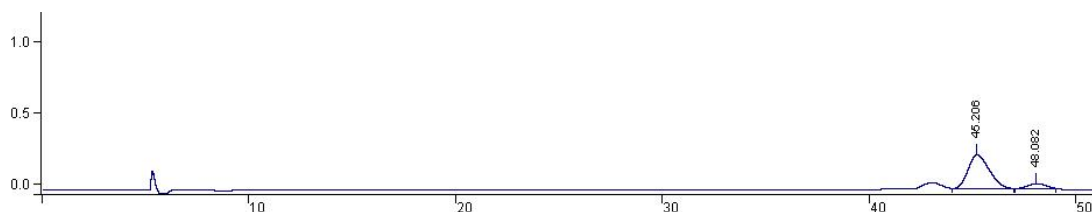

| Peak No. | Peak Name | Result ( ) | Ret. Time (min) | Time Offset (min) | Area (counts) | Sep. Code | Width 1/2 (sec) | Status Codes |
|----------|-----------|------------|-----------------|-------------------|---------------|-----------|-----------------|--------------|
| 1        |           | 90.1788    | 45.206          | 0.000             | 16814282      | BB        | 73.1            |              |
| 2        |           | 9.8212     | 48.082          | 0.000             | 1831211       | BB        | 62.0            |              |
| Totals:  |           | 100.0000   |                 | 0.000             | 18645493      |           |                 |              |

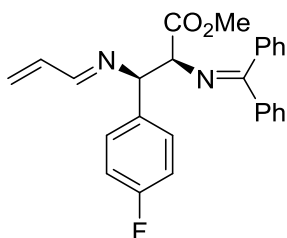

**Methyl (2S,3R)-3-(((E)-allylidene)amino)-2-((diphenylmethylene)amino)-3-(4-fluorophenyl)propanoate (3h)**

The reaction was performed with *N*-allyl imine (81.6 mg, 0.5 mmol), methyl glycinate (126 mg, 0.5 mmol), Pd(OAc)<sub>2</sub> (5.6 mg, 0.025 mmol), (S,S)-Cy DIOP (16.2 mg, 0.03 mmol), 2,6-dimethylbenzoquinone (70 mg, 0.5 mmol) and Et<sub>3</sub>N (50 mg, 0.5 mmol) in toluene (1.0 mL) for 42 h at -4°C. After removing the solvent, purification by flash chromatography (EtOAc / hexanes / Et<sub>3</sub>N = 5/95/1) gave product (149 mg, 72%) as a colorless oil.  $\alpha_D^{25} = -62.4$  ( $c = 1.0$ , CHCl<sub>3</sub>). IR: (neat) 3058, 1742, 1604, 1508 cm<sup>-1</sup>; <sup>1</sup>H NMR (500 MHz, d-CDCl<sub>3</sub>)  $\delta$  8.01 (d,  $J = 9.0$  Hz, 1H), 7.58 (d,  $J = 8.5$  Hz, 2H), 7.43-7.45 (m, 3H), 7.35-7.38 (m, 1H), 7.28-7.32 (m, 4H), 7.09 (dd,  $J = 7.5, 2.0$  Hz, 2H), 6.94 (t,  $J = 8.5$  Hz, 2H), 6.43-6.52 (m, 1H), 5.70 (d,  $J = 10.5$  Hz, 1H), 5.64 (d,  $J = 17.0$  Hz, 1H), 4.82 (d,  $J = 8.0$  Hz, 1H), 4.35 (d,  $J = 8.0$  Hz, 1H), 3.51 (s, 3H). <sup>13</sup>C NMR (125



MHz, CDCl<sub>3</sub>)  $\delta$  172.5, 170.8, 164.8, 162.3 (d,  $J$  = 244 Hz), 139.7, 137.0, 136.4, 136.0, 130.7, 129.8 (d,  $J$  = 8.0 Hz), 129.1, 128.8, 128.6, 128.3, 128.1, 127.9, 115.2 (d,  $J$  = 21.3 Hz), 77.1, 72.0, 52.2. HRMS (ESI+) calcd. for C<sub>26</sub>H<sub>23</sub>FN<sub>2</sub>O<sub>2</sub> [M+Na] 437.1641, found 437.1638.

Enantiomeric excess was determined by using HPLC with a chiral stationary phase. Stationary phase (AD column, flow rate = 1.0 mL/min, eluent: Hept/*i*-PrOH/Et<sub>3</sub>N = 100/1/0.1, 254 nm absorbance). Major enantiomer ( $t_R$  = 31.8 min), minor enantiomer ( $t_R$  = 34.6 min): er = 92.5 :7.5.

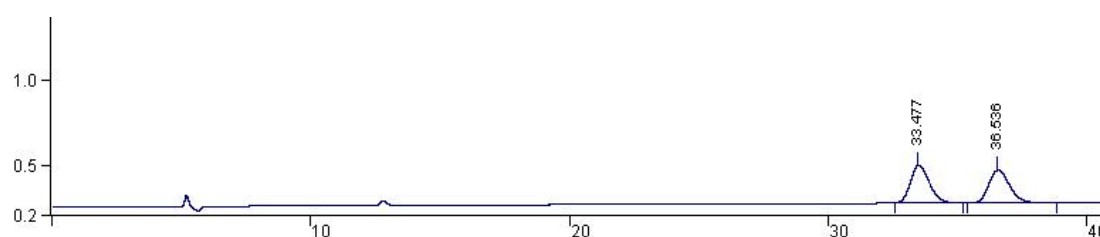

| Peak No. | Peak Name | Result (°) | Ret. Time (min) | Time Offset (min) | Area (counts) | Sep. Code | Width 1/2 (sec) | Status Codes |
|----------|-----------|------------|-----------------|-------------------|---------------|-----------|-----------------|--------------|
| 1        |           | 50.3642    | 33.477          | 0.000             | 11005453      | BB        | 48.9            |              |
| 2        |           | 49.6358    | 36.536          | 0.000             | 10846293      | BB        | 52.8            |              |
| Totals:  |           | 100.0000   |                 | 0.000             | 21851746      |           |                 |              |

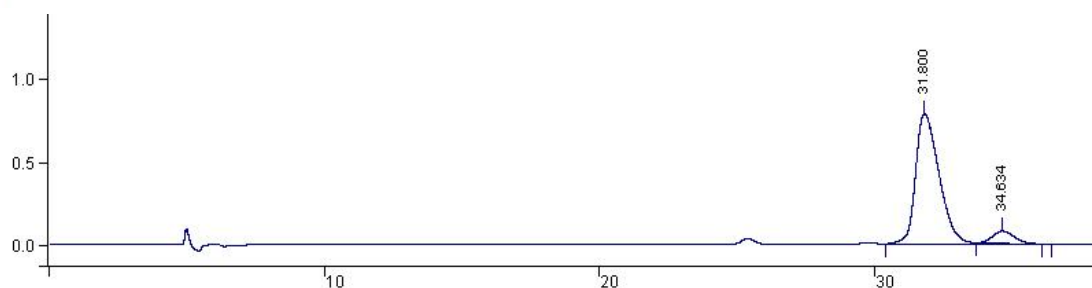

| Peak No. | Peak Name | Result (°) | Ret. Time (min) | Time Offset (min) | Area (counts) | Sep. Code | Width 1/2 (sec) | Status Codes |
|----------|-----------|------------|-----------------|-------------------|---------------|-----------|-----------------|--------------|
| 1        |           | 92.4230    | 31.800          | 0.000             | 46796644      | BB        | 60.6            |              |
| 2        |           | 7.5770     | 34.634          | 0.000             | 3836471       | TS        | 0.0             |              |
| Totals:  |           | 100.0000   |                 | 0.000             | 50633115      |           |                 |              |

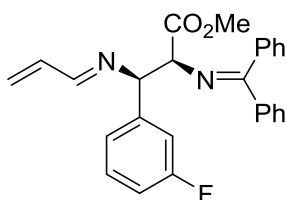



**Methyl (2S,3R)-3-(((E)-allylidene)amino)-2-((diphenylmethylene)amino)-3-(3-fluorophenyl)propanoate (3i)**

The reaction was performed with *N*-allyl imine (81.6 mg, 0.5 mmol), methyl glycinate (126 mg, 0.5 mmol), Pd(OAc)<sub>2</sub> (5.6 mg, 0.025 mmol), (S,S)-Cy DIOP (16.2 mg, 0.03 mmol), 2,6-dimethylbenzoquinone (70 mg, 0.5 mmol) and Et<sub>3</sub>N (50 mg, 0.5 mmol) in toluene (1.0 mL) for 42 h at -4°C. After removing the solvent, purification by flash chromatography (EtOAc / hexanes / Et<sub>3</sub>N = 5/95/1) gave product (155 mg, 75%) as a colorless oil.  $\alpha_D^{25} = -52.5$  ( $c = 2.0$ , CHCl<sub>3</sub>). IR: (neat) 3061, 2952, 1742, 1619, 1446, 1325 cm<sup>-1</sup>; <sup>1</sup>H NMR (500 MHz, d-CDCl<sub>3</sub>)  $\delta$  8.05 (d,  $J = 9.0$  Hz, 1H), 7.60 (d,  $J = 8.5$  Hz, 2H), 7.46-7.48 (m, 3H), 7.39-7.41 (m, 1H), 7.32-7.35 (m, 2H), 7.22-7.26 (m, 1H), 7.07-7.12 (m, 4H), 6.91-6.94 (m, 1H), 6.50-6.56 (m, 1H), 5.75 (d,  $J = 10.5$  Hz, 1H), 5.68 (d,  $J = 17.5$  Hz, 1H), 4.89 (d,  $J = 8.0$  Hz, 1H), 4.53 (d,  $J = 7.5$  Hz, 1H), 3.59 (s, 3H). <sup>13</sup>C NMR (125 MHz, CDCl<sub>3</sub>)  $\delta$  172.6, 170.7, 165.0, 162.8 (d,  $J = 244$  Hz), 142.8, 139.7, 137.0, 136.4, 130.7, 130.0 (d,  $J = 8.0$  Hz), 129.1, 128.9, 128.6, 128.3, 128.3, 128.2, 123.9 (d,  $J = 2.5$  Hz), 115.3 (d,  $J = 21.8$  Hz), 114.7 (d,  $J = 21$  Hz), 76.8, 71.8, 52.2. HRMS (ESI+) calcd. for C<sub>26</sub>H<sub>23</sub>FN<sub>2</sub>O<sub>2</sub> [M+Na] 437.1641, found 437.1638.

Enantiomeric excess was determined by using HPLC with a chiral stationary phase. Stationary phase (AD column, flow rate = 1.0 mL/min, eluent: Hept/*i*-PrOH/Et<sub>3</sub>N = 20/1/0.1, 254 nm absorbance). Major enantiomer (tR = 14.7 min), minor enantiomer (tR = 15.8 min): er = 90.5 :9.5.

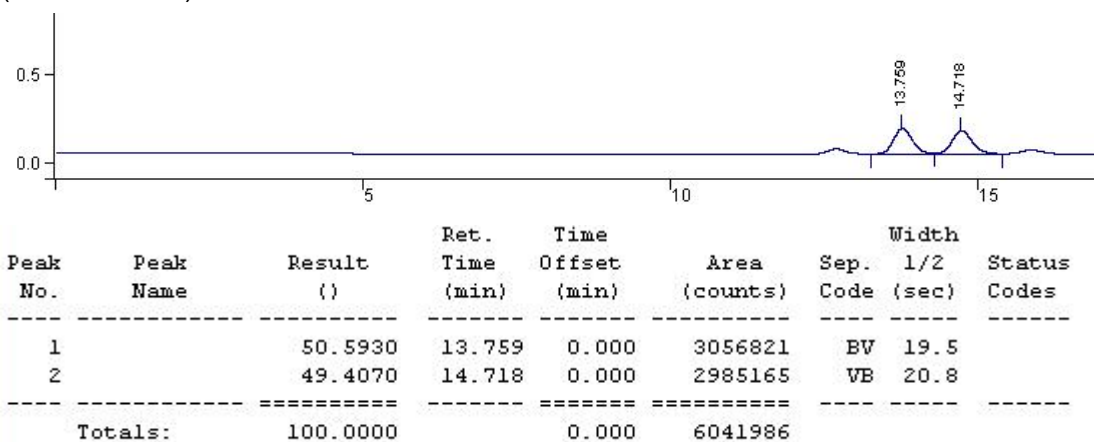



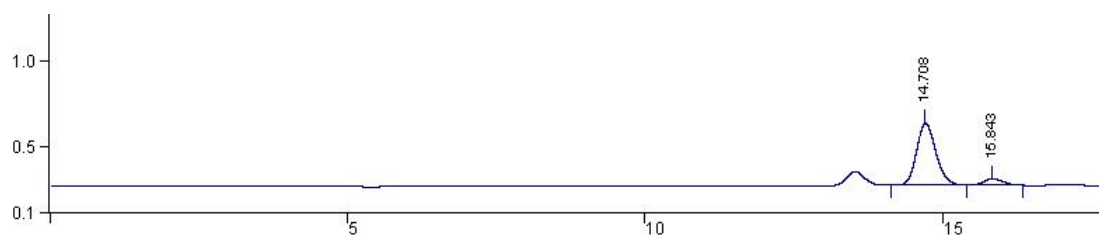

| Peak No. | Peak Name | Result {} | Ret. Time (min) | Time Offset (min) | Area (counts) | Sep. Code | Width 1/2 (sec) | Status Codes |
|----------|-----------|-----------|-----------------|-------------------|---------------|-----------|-----------------|--------------|
| 1        |           | 90.4709   | 14.708          | 0.000             | 8270483       | BV        | 20.8            |              |
| 2        |           | 9.5291    | 15.843          | 0.000             | 871112        | VB        | 21.6            |              |
| Totals:  |           | 100.0000  |                 | 0.000             | 9141595       |           |                 |              |

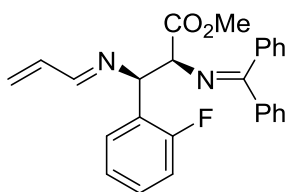

**Methyl (2S,3R)-3-(((E)-allylidene)amino)-2-((diphenylmethylene)amino)-3-(2-fluorophenyl)propanoate (3j)**

The reaction was performed with *N*-allyl imine (81.6 mg, 0.5 mmol), methyl glycinate (126 mg, 0.5 mmol), Pd(OAc)<sub>2</sub> (5.6 mg, 0.025 mmol), (S,S)-Cy DIOP (16.2 mg, 0.03 mmol), 2,6-dimethylbenzoquinone (70 mg, 0.5 mmol) and Et<sub>3</sub>N (50 mg, 0.5 mmol) in toluene (1.0 mL) for 42 h at -4°C. After removing the solvent, purification by flash chromatography (EtOAc / hexanes / Et<sub>3</sub>N = 5/95/1) gave product (157 mg, 76%) as a colorless oil.  $\alpha_D^{25} = -35.3$  ( $c = 1.0$ , CHCl<sub>3</sub>). IR: (neat) 3059, 2951, 1742, 1644, 1621, 1490 cm<sup>-1</sup>; <sup>1</sup>H NMR (500 MHz, d-CDCl<sub>3</sub>)  $\delta$  8.09 (d,  $J = 9.0$  Hz, 1H), 7.60 (d,  $J = 8.5$  Hz, 2H), 7.44-7.45 (m, 4H), 7.38-7.41 (m, 1H), 7.31-7.34 (m, 2H), 7.18-7.21 (s, 1H), 7.08 (dd,  $J = 7.5, 1.5$  Hz, 1H), 7.03-7.06 (m, 2H), 6.96-7.00 (m, 1H), 6.53-6.60 (m, 1H), 5.76 (d,  $J = 10.5$  Hz, 1H), 5.70 (d,  $J = 17.5$  Hz, 1H), 5.28 (d,  $J = 7.5$  Hz, 1H), 4.68 (d,  $J = 7.0$  Hz, 1H), 3.61 (s, 3H). <sup>13</sup>C NMR (125 MHz, CDCl<sub>3</sub>)  $\delta$  172.6, 170.7, 165.7, 160.2 (d,  $J = 244$  Hz), 139.7, 137.1, 136.4, 130.6, 130.2 (d,  $J = 2.5$  Hz), 129.2, 129.1, 128.9, 128.6, 128.5, 128.3 (d,  $J = 3.3$  Hz), 128.1, 127.3 (d,  $J = 13.3$  Hz), 124.3, 115.4 (d,  $J = 22.1$  Hz), 71.6, 70.0 (d,  $J = 16.3$  Hz), 52.3. HRMS (ESI+) calcd. for C<sub>26</sub>H<sub>23</sub>FN<sub>2</sub>O<sub>2</sub> [M+Na] 437.1641, found 437.1628.



Enantiomeric excess was determined by using HPLC with a chiral stationary phase. Stationary phase (AD column, flow rate = 1.0 mL/min, eluent: Hept/*i*-PrOH/Et<sub>3</sub>N = 100/1/0.1, 254 nm absorbance). Minor enantiomer (*t*<sub>R</sub> = 44.1 min), major enantiomer (*t*<sub>R</sub> = 46.7 min): *er* = 7 :93.

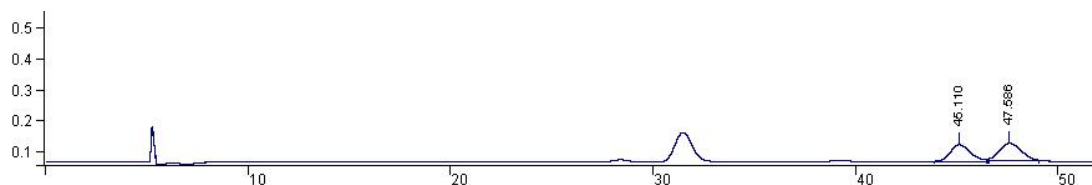

| Peak No. | Peak Name | Result ( ) | Ret. Time (min) | Time Offset (min) | Area (counts) | Sep. Code | Width 1/2 (sec) | Status Codes |
|----------|-----------|------------|-----------------|-------------------|---------------|-----------|-----------------|--------------|
| 1        |           | 48.0339    | 45.110          | 0.000             | 3687394       | BV        | 66.4            | U            |
| 2        |           | 51.9661    | 47.586          | 0.000             | 3989255       | VB        | 74.6            | U            |
| Totals:  |           | 100.0000   |                 | 0.000             | 7676649       |           |                 |              |

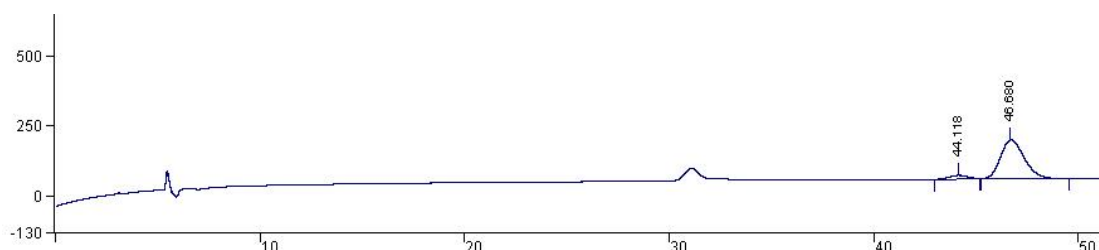

| Peak No. | Peak Name | Result ( ) | Ret. Time (min) | Time Offset (min) | Area (counts) | Sep. Code | Width 1/2 (sec) | Status Codes |
|----------|-----------|------------|-----------------|-------------------|---------------|-----------|-----------------|--------------|
| 1        |           | 6.6898     | 44.118          | 0.000             | 798494        | BB        | 67.7            |              |
| 2        |           | 93.3102    | 46.680          | 0.000             | 11137474      | BB        | 77.3            |              |
| Totals:  |           | 100.0000   |                 | 0.000             | 11935968      |           |                 |              |

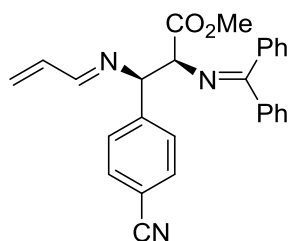

**Methyl (2S,3R)-3-(((E)-allylidene)amino)-3-(4-cyanophenyl)-2-((diphenylmethylene)amino)propanoate (3k)**

The reaction was performed with *N*-allyl imine (84.1 mg, 0.5 mmol), methyl glycinate (126 mg, 0.5 mmol), Pd(OAc)<sub>2</sub> (5.6 mg, 0.025 mmol), (*S,S*)-Cy DIOP (16.2 mg, 0.03 mmol), 2,6-dimethylbenzoquinone (70 mg, 0.5 mmol) and Et<sub>3</sub>N (50 mg, 0.5 mmol) in



toluene (1.0 mL) for 40 h at -4 °C. After removing the solvent, purification by flash chromatography (EtOAc / hexanes /Et<sub>3</sub>N = 5/95/1) gave product (147 mg, 70%) as a colorless oil.  $\alpha_D^{25} = -77.7$  ( $c = 2.0$ , CHCl<sub>3</sub>). IR: (neat) 3054, 2228, 1741, 1606, 1576 cm<sup>-1</sup>; <sup>1</sup>H NMR (500 MHz, d-CDCl<sub>3</sub>)  $\delta$  8.02 (d,  $J = 9.0$  Hz, 1H), 7.54-7.57 (m, 4H), 7.43-7.45 (m, 5H), 7.31-7.37 (m, 1H), 7.30-7.33 (m, 2H), 7.03-7.05 (m, 2H), 6.46-6.52 (m, 1H), 5.75 (d,  $J = 10.0$  Hz, 1H), 5.67 (d,  $J = 17.0$  Hz, 1H), 4.91 (d,  $J = 7.5$  Hz, 1H), 4.48 (d,  $J = 7.5$  Hz, 1H), 3.54 (s, 3H). <sup>13</sup>C NMR (125 MHz, CDCl<sub>3</sub>)  $\delta$  173.0, 170.4, 165.5, 145.8, 139.4, 136.8, 136.2, 132.3, 130.8, 129.2, 129.1, 129.1, 128.8, 128.7, 128.2, 128.1, 119.0, 111.5, 77.3, 71.5, 52.4. HRMS (ESI+) calcd. for C<sub>27</sub>H<sub>23</sub>N<sub>3</sub>O<sub>2</sub> [M+Na] 444.1670, found 444.1682.

Enantiomeric excess was determined by using HPLC with a chiral stationary phase. Stationary phase (AD column, flow rate = 1.0 mL/min, eluent: Hept/*i*-PrOH/Et<sub>3</sub>N = 20/1/0.1, 254 nm absorbance). Minor enantiomer (t<sub>R</sub> = 29.5 min), major enantiomer (t<sub>R</sub> = 33.0 min): er = 11.5 :88.5.

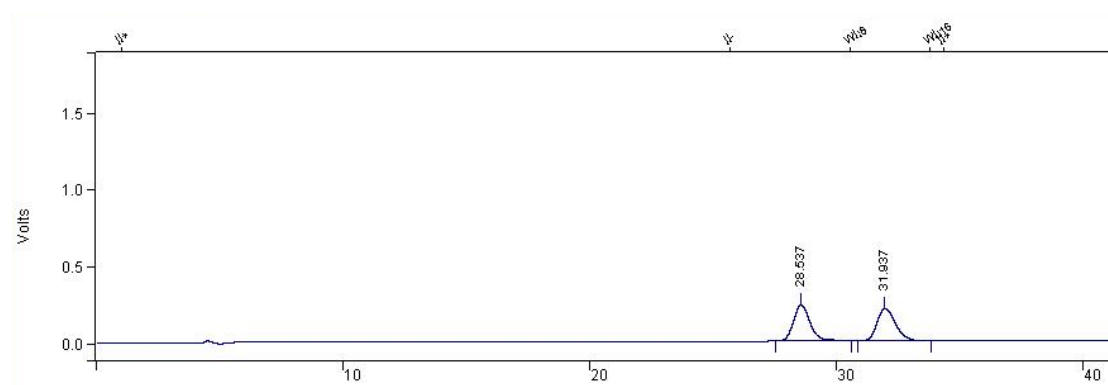

| Peak No. | Peak Name | Result ( ) | Ret. Time (min) | Time Offset (min) | Area (counts) | Sep. Code | Width 1/2 (sec) | Status Codes |
|----------|-----------|------------|-----------------|-------------------|---------------|-----------|-----------------|--------------|
| 1        |           | 50.2198    | 28.537          | 0.000             | 10957139      | BB        | 43.1            |              |
| 2        |           | 49.7801    | 31.937          | 0.000             | 10861204      | BB        | 48.3            |              |
| Totals:  |           | 99.9999    |                 | 0.000             | 21818343      |           |                 |              |

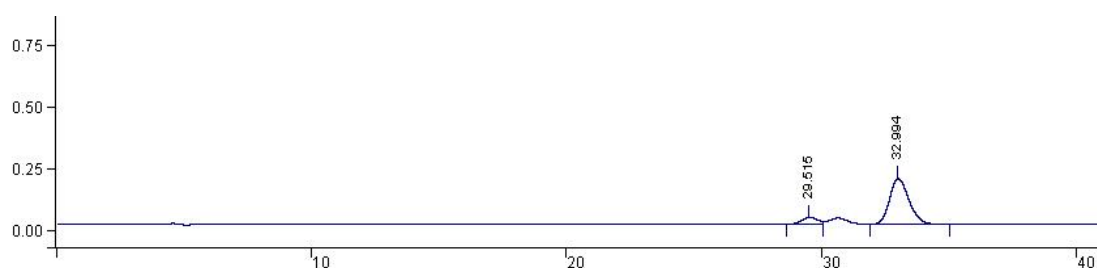



| Peak No. | Peak Name | Result (s) | Ret. Time (min) | Time Offset (min) | Area (counts) | Sep. Code | Width 1/2 (sec) | Status Codes |
|----------|-----------|------------|-----------------|-------------------|---------------|-----------|-----------------|--------------|
| 1        |           | 11.5250    | 29.515          | 0.000             | 1268972       | BB        | 46.2            |              |
| 2        |           | 88.4750    | 32.994          | 0.000             | 9741600       | BB        | 49.3            |              |
| Totals:  |           | 100.0000   |                 | 0.000             | 11010572      |           |                 |              |

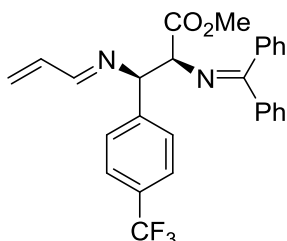

**Methyl (2S,3R)-3-(((E)-allylidene)amino)-2-((diphenylmethylene)amino)-3-(4-trifluoromethylphenyl)propanoate (3I)**

The reaction was performed with *N*-allyl imine (106.2 mg, 0.5 mmol), methyl glycinate (126 mg, 0.5 mmol), Pd(OAc)<sub>2</sub> (5.6 mg, 0.025 mmol), (S,S)-Cy DIOP (16.2 mg, 0.03 mmol), 2,6-dimethylbenzoquinone (70 mg, 0.5 mmol) and Et<sub>3</sub>N (50 mg, 0.5 mmol) in toluene (1.0 mL) for 72 h at -4°C. After removing the solvent, purification by flash chromatography (EtOAc / hexanes / Et<sub>3</sub>N = 5/95/1) gave product (167 mg, 72%) as a colorless oil.  $\alpha_D^{25} = -83.4$  ( $c = 1.0$ , CHCl<sub>3</sub>). IR: (neat) 3062, 2952, 1743, 1651, 1618, 1326 cm<sup>-1</sup>; <sup>1</sup>H NMR (500 MHz, d-CDCl<sub>3</sub>)  $\delta$  8.03 (d,  $J = 9.0$  Hz, 1H), 7.57-7.59 (m, 2H), 7.49-7.52 (m, 2H), 7.43-7.45 (m, 3H), 7.35-7.38 (m, 2H), 7.32 (d,  $J = 7.5$  Hz, 2H), 7.27-7.30 (m, 1H), 7.04-7.06 (m, 2H), 6.47-6.54 (m, 1H), 5.73 (d,  $J = 10.5$  Hz, 1H), 5.67 (d,  $J = 17.5$  Hz, 1H), 4.93 (d,  $J = 7.5$  Hz, 1H), 4.53 (d,  $J = 7.5$  Hz, 1H), 3.53 (s, 3H). <sup>13</sup>C NMR (125 MHz, CDCl<sub>3</sub>)  $\delta$  172.8, 170.6, 165.3, 144.4, 139.6, 137.0, 136.9, 136.3, 135.6, 130.8, 129.9 (d,  $J = 32$  Hz), 129.1, 128.7, 128.6, 128.2, 128.1 (d,  $J = 5$  Hz), 125.4, 124.1 (d,  $J = 267$  Hz), 77.3, 71.7, 52.3. HRMS (ESI+) calcd. for C<sub>27</sub>H<sub>23</sub>F<sub>3</sub>N<sub>2</sub>O<sub>2</sub> [M+Na] 487.1593, found 487.1604.

Enantiomeric excess was determined by using HPLC with a chiral stationary phase. Stationary phase (AD column, flow rate = 0.8 mL/min, eluent: Hept/*i*-PrOH/Et<sub>3</sub>N = 100/1/0.1, 254 nm absorbance). Major enantiomer ( $t_R = 15.1$  min), minor enantiomer ( $t_R = 19.4$  min): er = 91.5 :8.5.



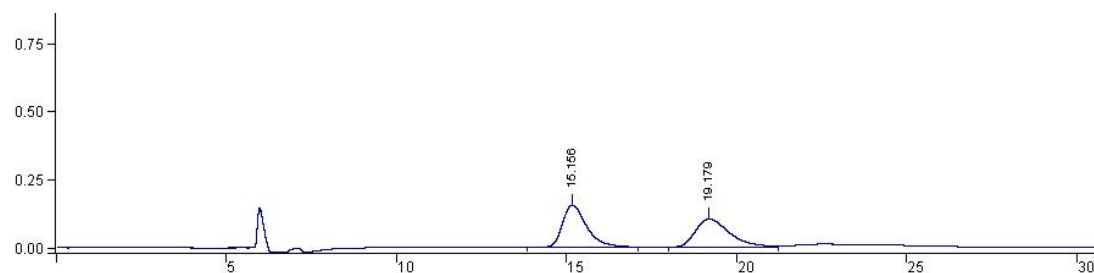

| Peak No. | Peak Name | Result (°C) | Ret. Time (min) | Time Offset (min) | Area (counts) | Sep. Code | Width 1/2 (sec) | Status Codes |
|----------|-----------|-------------|-----------------|-------------------|---------------|-----------|-----------------|--------------|
| 1        |           | 50.7857     | 15.156          | 0.000             | 7621719       | BB        | 47.0            |              |
| 2        |           | 49.2143     | 19.179          | 0.000             | 7385892       | BB        | 66.1            |              |
| Totals:  |           | 100.0000    |                 | 0.000             | 15007611      |           |                 |              |

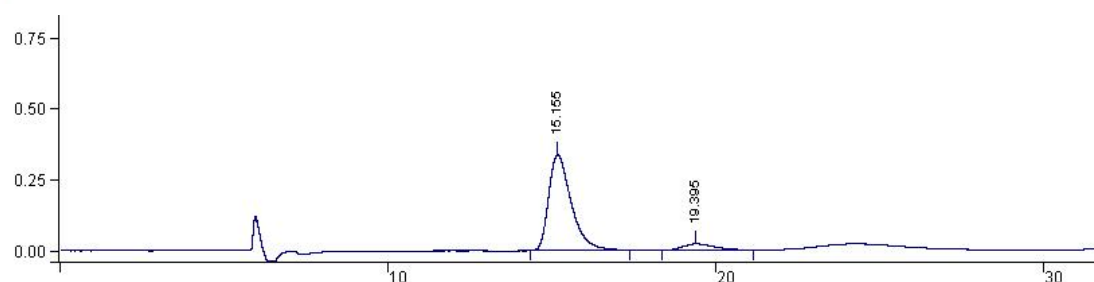

| Peak No. | Peak Name | Result (°C) | Ret. Time (min) | Time Offset (min) | Area (counts) | Sep. Code | Width 1/2 (sec) | Status Codes |
|----------|-----------|-------------|-----------------|-------------------|---------------|-----------|-----------------|--------------|
| 1        |           | 91.4727     | 15.155          | 0.000             | 16156736      | BB        | 46.4            |              |
| 2        |           | 8.5273      | 19.395          | 0.000             | 1506163       | BB        | 66.6            |              |
| Totals:  |           | 100.0000    |                 | 0.000             | 17662899      |           |                 |              |

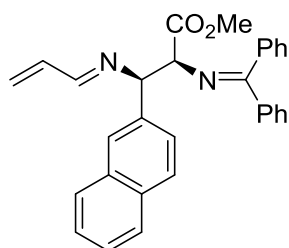

**Methyl (2S,3R)-3-(((E)-allylidene)amino)-2-((diphenylmethylene)amino)-3-(naphthalene-2-yl)propanoate (3m)**

The reaction was performed with *N*-allyl imine (97.6 mg, 0.5 mmol), methyl glycinate (126 mg, 0.5 mmol), Pd(OAc)<sub>2</sub> (5.6 mg, 0.025 mmol), (S,S)-Cy DIOP (16.2 mg, 0.03 mmol), 2,6-dimethylbenzoquinone (70 mg, 0.5 mmol) and Et<sub>3</sub>N (50 mg, 0.5 mmol) in toluene (1.0 mL) for 40 h at 4°C. After removing the solvent, purification by flash chromatography (EtOAc / hexanes / Et<sub>3</sub>N = 5/95/1) gave product (167 mg, 75%) as a



colorless oil.  $\alpha_D^{25} = -70.5$  ( $c = 1.0$ ,  $\text{CHCl}_3$ ). IR: (neat) 3057, 2950, 1741, 1621, 1446  $\text{cm}^{-1}$ ;  $^1\text{H}$  NMR (400 MHz,  $\text{d-CDCl}_3$ )  $\delta$  8.08 (d,  $J = 9.2$  Hz, 1H), 7.75-7.77 (m, 3H), 7.72-7.74 (m, 1H), 7.58 (d,  $J = 8.4$  Hz, 2H), 7.40-7.45 (m, 6H), 7.36-7.38 (m, 1H), 7.29-7.33 (m, 2H), 7.04-7.07 (m, 2H), 6.49-6.55 (m, 1H), 5.72 (d,  $J = 10.4$  Hz, 1H), 5.66 (d,  $J = 17.2$  Hz, 1H), 5.04 (d,  $J = 8.0$  Hz, 1H), 4.66 (d,  $J = 8.0$  Hz, 1H), 3.46 (s, 3H).  $^{13}\text{C}$  NMR (125 MHz,  $\text{CDCl}_3$ )  $\delta$  172.4, 170.9, 164.9, 139.8, 137.7, 137.1, 136.5, 133.5, 133.1, 131.1, 130.6, 129.2, 128.9, 128.6, 128.3, 128.2, 128.2, 128.1, 127.8, 127.2, 126.3, 126.1, 126.0, 78.1, 71.9, 52.2. HRMS (ESI+) calcd. for  $\text{C}_{30}\text{H}_{26}\text{N}_2\text{O}_2$   $[\text{M}+\text{Na}]$  469.1892, found 469.1882.

Enantiomeric excess was determined by using HPLC with a chiral stationary phase. Stationary phase (AD column, flow rate = 1.0 mL/min, eluent: Hept/*i*-PrOH/ $\text{Et}_3\text{N}$  = 40/1/0.1, 254 nm absorbance). Major enantiomer ( $t_R = 21.7$  min), minor enantiomer ( $t_R = 43.4$  min): er = 90 :10.

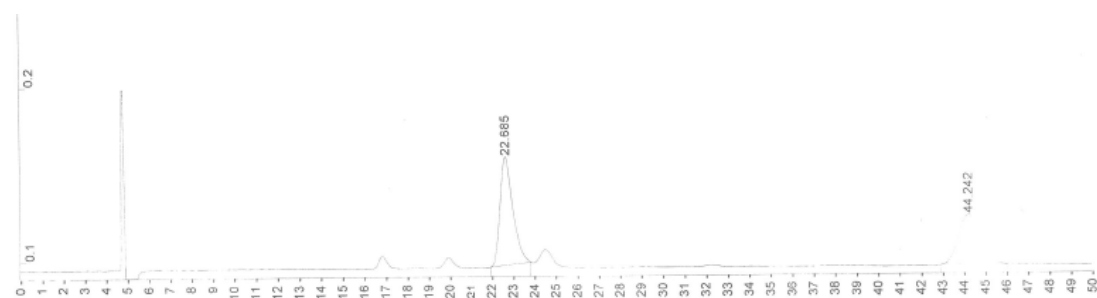

| Peak No. | Peak Name | Result ( ) | Ret. Time (min) | Time Offset (min) | Area (counts) | Sep. Code | Width 1/2 (sec) | Status Codes |
|----------|-----------|------------|-----------------|-------------------|---------------|-----------|-----------------|--------------|
| 1        |           | 50.5346    | 22.685          | 0.000             | 2113546       | BB        | 36.6            |              |
| 2        |           | 49.4654    | 44.242          | 0.000             | 2068831       | BB        | 67.9            |              |
| Totals:  |           | 100.0000   |                 | 0.000             | 4182377       |           |                 |              |

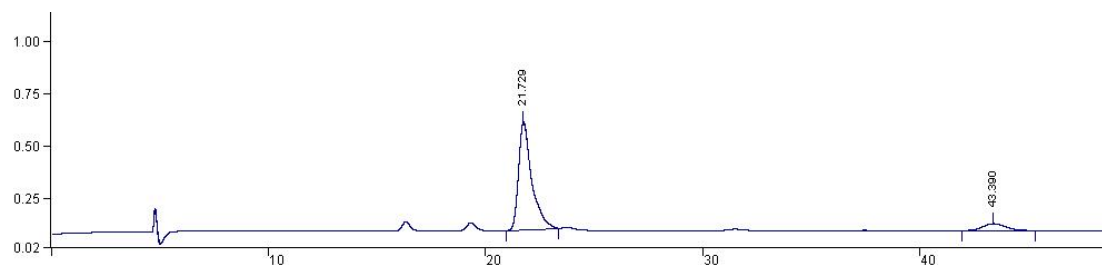



| Peak No. | Peak Name | Result ( ) | Ret. Time (min) | Time Offset (min) | Area (counts) | Sep. Code | Width 1/2 (sec) | Status Codes |
|----------|-----------|------------|-----------------|-------------------|---------------|-----------|-----------------|--------------|
| 1        |           | 90.2635    | 21.729          | 0.000             | 21758568      | BB        | 37.4            |              |
| 2        |           | 9.7365     | 43.390          | 0.000             | 2347048       | BB        | 67.7            |              |
| Totals:  |           | 100.0000   |                 | 0.000             | 24105616      |           |                 |              |

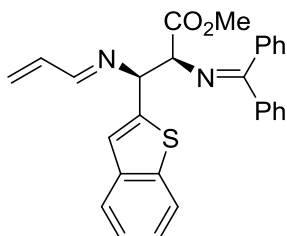

**Methyl (2S,3S)-3-(((E)-allylidene)amino)-3-(benzo[b]thiophen-2-yl)-2-((diphenylmethylene)amino)propanoate (3n)**

The reaction was performed with *N*-allyl imine (99.8 mg, 0.5 mmol), methyl glycinate (126 mg, 0.5 mmol), Pd(OAc)<sub>2</sub> (5.6 mg, 0.025 mmol), (S,S)-Cy DIOP (16.2 mg, 0.03 mmol), 2,6-dimethylbenzoquinone (70 mg, 0.5 mmol) and Et<sub>3</sub>N (50 mg, 0.5 mmol) in toluene (1.0 mL) for 62 h at 4 °C. After removing the solvent, purification by flash chromatography (EtOAc / hexanes /Et<sub>3</sub>N = 5/95/1) gave product (138 mg, 61%) as a colorless oil.  $\alpha_D^{25} = -49.5$  ( $c = 1.0$ , CHCl<sub>3</sub>). IR: (neat) 3057, 2950, 1741, 1645, 1620 cm<sup>-1</sup>; <sup>1</sup>H NMR (500 MHz, d-CDCl<sub>3</sub>)  $\delta$  8.10 (d,  $J = 9.0$  Hz, 1H), 7.77 (d,  $J = 8.0$  Hz, 1H), 7.71 (d,  $J = 8.0$  Hz, 1H), 7.66-7.68 (m, 2H), 7.47-7.49 (m, 3H), 7.42-7.47 (m, 1H), 7.35-7.38 (m, 2H), 7.28-7.32 (m, 2H), 7.23 (s, 1H), 7.17-7.19 (m, 2H), 6.56-6.62 (m, 1H), 5.78 (d,  $J = 10.5$  Hz, 1H), 5.73 (d,  $J = 17.5$  Hz, 1H), 5.37 (d,  $J = 7.5$  Hz, 1H), 4.68 (d,  $J = 7.5$  Hz, 1H), 3.64 (s, 3H). <sup>13</sup>C NMR (125 MHz, CDCl<sub>3</sub>)  $\delta$  172.8, 170.6, 165.4, 143.9, 140.0, 139.6, 139.4, 136.9, 136.2, 130.7, 129.2, 128.9, 128.6, 128.2, 128.1, 124.2, 124.1, 123.5, 122.4, 121.6, 72.9, 71.8, 52.4. HRMS (ESI+) calcd. for C<sub>28</sub>H<sub>24</sub>N<sub>2</sub>O<sub>2</sub>S [M+Na] 475.1441, found 475.1451.

Enantiomeric excess was determined by using HPLC with a chiral stationary phase. Stationary phase (AD column, flow rate = 1.0 mL/min, eluent: Hept/*i*-PrOH/Et<sub>3</sub>N = 20/1/0.1, 254 nm absorbance). Major enantiomer (tR = 7.2 min), minor enantiomer (tR = 12.4 min): er = 88.5 :11.5.



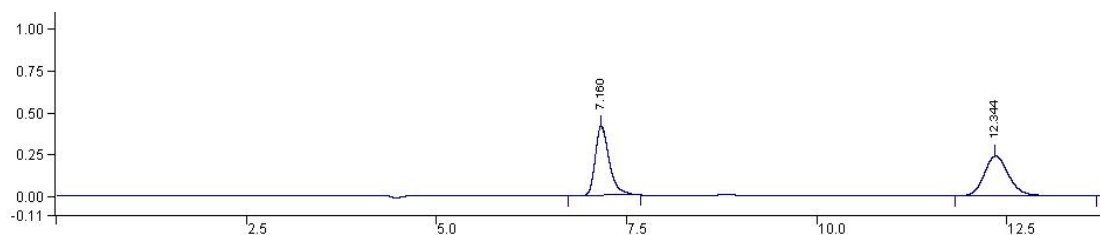

| Peak No. | Peak Name | Result ( ) | Ret. Time (min) | Time Offset (min) | Area (counts) | Sep. Code | Width 1/2 (sec) | Status Codes |
|----------|-----------|------------|-----------------|-------------------|---------------|-----------|-----------------|--------------|
| 1        |           | 50.4046    | 7.160           | 0.000             | 5327029       | BB        | 11.4            |              |
| 2        |           | 49.5954    | 12.344          | 0.000             | 5241515       | BB        | 20.2            |              |
| Totals:  |           | 100.0000   |                 | 0.000             | 10568544      |           |                 |              |

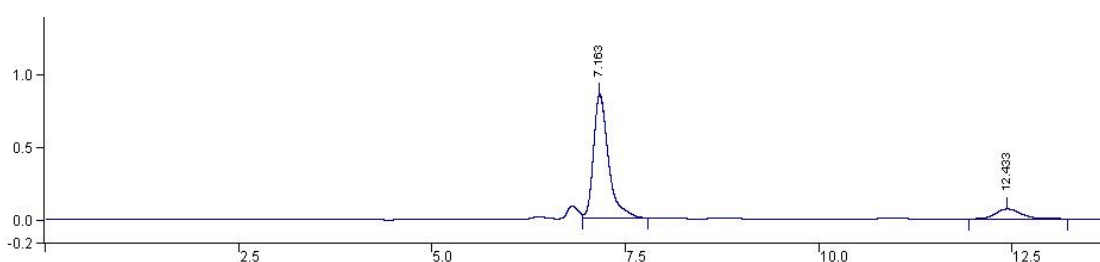

| Peak No. | Peak Name | Result ( ) | Ret. Time (min) | Time Offset (min) | Area (counts) | Sep. Code | Width 1/2 (sec) | Status Codes |
|----------|-----------|------------|-----------------|-------------------|---------------|-----------|-----------------|--------------|
| 1        |           | 88.4071    | 7.163           | 0.000             | 11505078      | BB        | 11.4            |              |
| 2        |           | 11.5929    | 12.433          | 0.000             | 1508671       | BB        | 20.7            |              |
| Totals:  |           | 100.0000   |                 | 0.000             | 13013749      |           |                 |              |

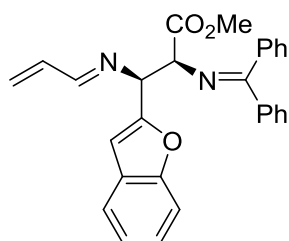

**Methyl (2S,3S)-3-(((E)-allylidene)amino)-3-(benzofuran-2-yl)-2-((diphenylmethylene)amino)propanoate (3o)**

The reaction was performed with *N*-allyl imine (92.6 mg, 0.5 mmol), methyl glycinate (126 mg, 0.5 mmol), Pd(OAc)<sub>2</sub> (5.6 mg, 0.025 mmol), (S,S)-Cy DIOP (16.2 mg, 0.03 mmol), 2,6-dimethylbenzoquinone (70 mg, 0.5 mmol) and Et<sub>3</sub>N (50 mg, 0.5 mmol) in toluene (1.0 mL) for 50 h at 4°C. After removing the solvent, purification by flash chromatography (EtOAc / hexanes / Et<sub>3</sub>N = 5/95/1) gave product (144 mg, 66%) as a



colorless oil.  $\alpha_D^{25} = -58.2$  ( $c = 1.0$ ,  $\text{CHCl}_3$ ). IR: (neat) 3058, 1742, 1622, 1454  $\text{cm}^{-1}$ ;  $^1\text{H}$  NMR (500 MHz,  $\text{d-CDCl}_3$ )  $\delta$  8.13 (d,  $J = 9.0$  Hz, 1H), 7.59-7.61 (m, 2H), 7.49-7.51 (m, 1H), 7.46-7.47 (m, 3H), 7.38-7.42 (m, 2H), 7.31-7.34 (m, 2H), 7.19-7.24 (m, 2H), 7.16-7.18 (m, 2H), 6.62 (s, 1H), 6.55-6.60 (m, 1H), 5.79 (d,  $J = 11.0$  Hz, 1H), 5.75 (d,  $J = 17.5$  Hz, 1H), 5.14 (d,  $J = 8.0$  Hz, 1H), 4.66 (d,  $J = 8.0$  Hz, 1H), 3.65 (s, 3H).  $^{13}\text{C}$  NMR (125 MHz,  $\text{CDCl}_3$ )  $\delta$  172.9, 170.6, 166.7, 155.6, 155.0, 139.8, 136.9, 136.2, 130.7, 129.2, 129.0, 128.9, 128.7, 128.3, 128.3, 128.2, 124.1, 122.8, 121.0, 111.5, 104.6, 71.1, 68.8, 52.5. HRMS (ESI+) calcd. for  $\text{C}_{28}\text{H}_{25}\text{N}_2\text{O}_3$   $[\text{M}+\text{H}]$  437.1865, found 437.1860.

Enantiomeric excess was determined by using HPLC with a chiral stationary phase. Stationary phase (AD column, flow rate = 1.0 mL/min, eluent: Hept/*i*-PrOH/ $\text{Et}_3\text{N}$  = 20/1/0.1, 254 nm absorbance). Major enantiomer ( $t_R = 20.5$  min), minor enantiomer ( $t_R = 26.8$  min): er = 89 :11.

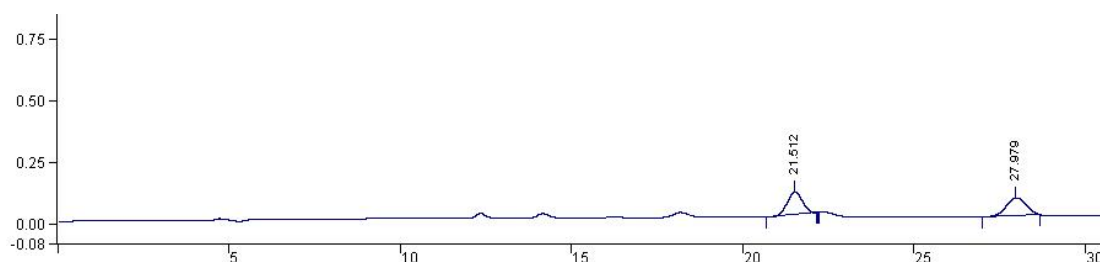

| Peak No. | Peak Name | Result ( ) | Time (min) | Offset (min) | Area (counts) | Sep. Code | 1/2 (sec) | Status Codes |
|----------|-----------|------------|------------|--------------|---------------|-----------|-----------|--------------|
| 1        |           | 49.5931    | 21.512     | 0.000        | 2833231       | BB        | 33.1      | U            |
| 2        |           | 50.4069    | 27.979     | 0.000        | 2879720       | BB        | 39.9      |              |
| Totals:  |           | 100.0000   |            | 0.000        | 5712951       |           |           |              |

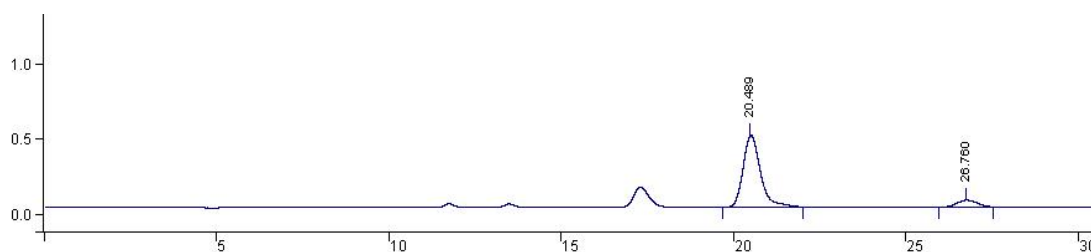



| Peak No. | Peak Name | Result () | Ret. Time (min) | Time Offset (min) | Area (counts) | Sep. Code | Width 1/2 (sec) | Status Codes |
|----------|-----------|-----------|-----------------|-------------------|---------------|-----------|-----------------|--------------|
| 1        |           | 89.7737   | 20.489          | 0.000             | 16704058      | BB        | 31.5            |              |
| 2        |           | 10.2263   | 26.760          | 0.000             | 1902784       | BB        | 40.3            |              |
| Totals:  |           | 100.0000  |                 | 0.000             | 18606842      |           |                 |              |

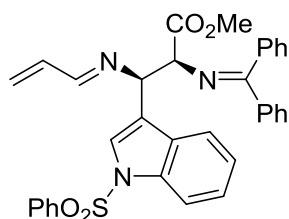

**Methyl (2S,3R)-3-(((E)-allylidene)amino)-2-((diphenylmethylene)amino)-3-(1-(phenylsulfonyl)-1H-indol-3-yl)propanoate (3p)**

The reaction was performed with *N*-allyl imine (170.0 mg, 0.5 mmol), methyl glycinate (126 mg, 0.5 mmol), Pd(OAc)<sub>2</sub> (5.6 mg, 0.025 mmol), (S,S)-Cy DIOP (16.2 mg, 0.03 mmol), 2,6-dimethylbenzoquinone (70 mg, 0.5 mmol) and Et<sub>3</sub>N (50 mg, 0.5 mmol) in toluene (1.0 mL) for 42 h at 4°C. After removing the solvent, purification by flash chromatography (EtOAc / hexanes / Et<sub>3</sub>N = 8/92/1) gave product (178 mg, 62%) as a colorless oil.  $\alpha_D^{25} = -79.3$  ( $c = 2.0$ , CHCl<sub>3</sub>). IR: (neat) 3058, 1741, 1650, 1619, 1447 cm<sup>-1</sup>; <sup>1</sup>H NMR (500 MHz, d-CDCl<sub>3</sub>)  $\delta$  8.03 (d,  $J = 9.0$  Hz, 1H), 7.90 (d,  $J = 8.5$  Hz, 1H), 7.81 (dd,  $J = 8.5, 1.0$  Hz, 2H), 7.59 (dd,  $J = 8.5, 1.5$  Hz, 2H), 7.54 (s, 1H), 7.42-7.46 (m, 2H), 7.34-7.36 (m, 3H), 7.25-7.32 (m, 6H), 7.08 (t,  $J = 8.0$  Hz, 1H), 6.90 (d,  $J = 7.0$  Hz, 2H), 6.47-6.54 (m, 1H), 5.71 (d,  $J = 10.5$  Hz, 1H), 5.63 (d,  $J = 17.5$  Hz, 1H), 5.13 (d,  $J = 7.5$  Hz, 1H), 4.55 (d,  $J = 7.5$  Hz, 1H), 3.47 (s, 3H). <sup>13</sup>C NMR (125 MHz, CDCl<sub>3</sub>)  $\delta$  172.0, 169.2, 165.1, 139.7, 138.2, 137.2, 136.1, 135.2, 133.8, 133.5, 130.7, 129.4, 129.3, 129.2, 128.8, 128.4, 128.2, 128.1, 127.0, 124.8, 124.4, 123.3, 121.7, 120.7, 113.5, 69.8, 69.7, 52.2. HRMS (ESI+) calcd. for C<sub>34</sub>H<sub>29</sub>N<sub>3</sub>O<sub>4</sub>S [M+Na] 598.1776, found 598.1771.

Enantiomeric excess was determined by using HPLC with a chiral stationary phase. Stationary phase (AD column, flow rate = 1.0 mL/min, eluent: Hept/*i*-PrOH/Et<sub>3</sub>N =



20/1/0.1, 254 nm absorbance). Major enantiomer (tR = 43.2 min), minor enantiomer (tR = 53.2 min): er = 89 :11.

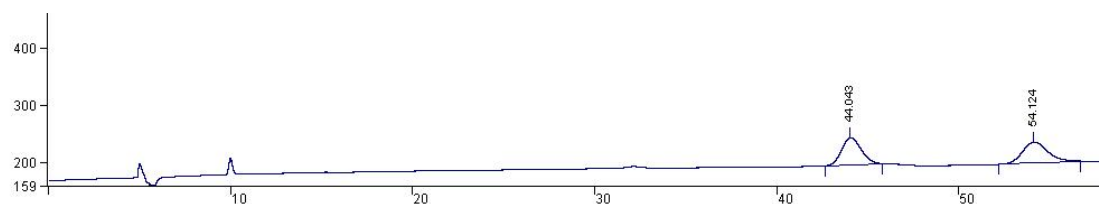

| Peak No. | Peak Name | Result ( ) | Ret. Time (min) | Time Offset (min) | Area (counts) | Sep. Code | Width 1/2 (sec) | Status Codes |
|----------|-----------|------------|-----------------|-------------------|---------------|-----------|-----------------|--------------|
| 1        |           | 50.1614    | 44.043          | 0.000             | 3574362       | BB        | 74.8            |              |
| 2        |           | 49.8386    | 54.124          | 0.000             | 3551360       | BB        | 99.3            |              |
| Totals:  |           | 100.0000   |                 | 0.000             | 7125722       |           |                 |              |

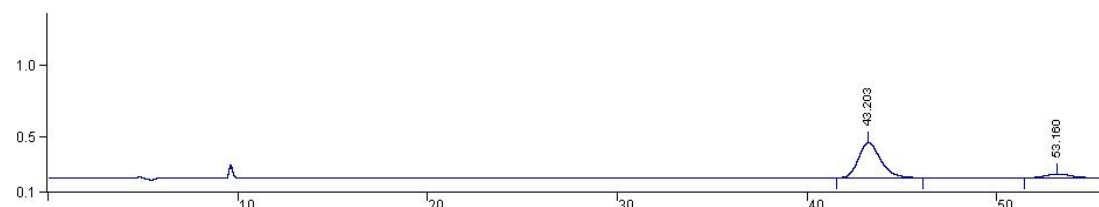

| Peak No. | Peak Name | Result ( ) | Ret. Time (min) | Time Offset (min) | Area (counts) | Sep. Code | Width 1/2 (sec) | Status Codes |
|----------|-----------|------------|-----------------|-------------------|---------------|-----------|-----------------|--------------|
| 1        |           | 88.8054    | 43.203          | 0.000             | 19966292      | BB        | 77.4            |              |
| 2        |           | 11.1946    | 53.160          | 0.000             | 2516911       | BB        | 89.8            |              |
| Totals:  |           | 100.0000   |                 | 0.000             | 22483203      |           |                 |              |

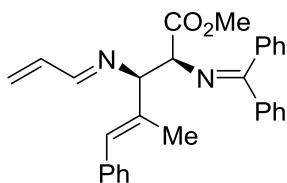

**Methyl (2S,3R,E)-3-(((E)-allylidene)amino)-2-((diphenylmethylene)amino)-4-methyl-5-phenylpent-4-enoate (3q)**

The reaction was performed with *N*-allyl imine (91.8 mg, 0.5 mmol), methyl glycinate (126 mg, 0.5 mmol), Pd(OAc)<sub>2</sub> (5.6 mg, 0.025 mmol), (S,S)-Cy DIOP (16.2 mg, 0.03 mmol), 2,6-dimethylbenzoquinone (70 mg, 0.5 mmol) and Et<sub>3</sub>N (50 mg, 0.5 mmol) in toluene (1.0 mL) for 72 h at 4°C. After removing the solvent, purification by flash chromatography (EtOAc / hexanes / Et<sub>3</sub>N = 5/95/1) gave product (162 mg, 74%) as a colorless oil.  $\alpha_D^{25} = -36.8$  ( $c = 2.0$ , CHCl<sub>3</sub>). IR: (neat) 3056, 2950, 1742, 1614, 1492



cm<sup>-1</sup>; <sup>1</sup>H NMR (500 MHz, d-CDCl<sub>3</sub>) δ 8.05 (d, *J* = 9.0 Hz, 1H), 7.60-7.62 (m, 2H), 7.46-7.48 (m, 3H), 7.39-7.41 (m, 1H), 7.30-7.35 (m, 5H), 7.23-7.25 (m, 2H), 7.20-7.22 (m, 2H), 6.50-6.57 (m, 2H), 5.76 (d, *J* = 10.0 Hz, 1H), 5.70 (d, *J* = 17.0 Hz, 1H), 4.61 (d, *J* = 7.5 Hz, 1H), 4.42 (d, *J* = 7.5 Hz, 1H), 3.70 (s, 3H), 1.87 (s, 3H). <sup>13</sup>C NMR (125 MHz, CDCl<sub>3</sub>) δ 172.1, 171.3, 164.7, 139.9, 137.7, 137.4, 137.2, 136.5, 130.5, 129.2, 129.1, 128.9, 128.6, 128.3, 128.2, 128.2, 128.1, 127.9, 126.6, 82.3, 69.3, 52.3, 15.2. HRMS (ESI+) calcd. for C<sub>29</sub>H<sub>28</sub>N<sub>2</sub>O<sub>2</sub> [M+Na] 459.2033, found 459.2043.

Enantiomeric excess was determined by using HPLC with a chiral stationary phase. Stationary phase (AD column, flow rate = 1.0 mL/min, eluent: Hept/*i*-PrOH/Et<sub>3</sub>N = 20/1/0.1, 254 nm absorbance). Major enantiomer (t<sub>R</sub> = 7.2 min), minor enantiomer (t<sub>R</sub> = 9.5 min): er = 86.5 :13.5.

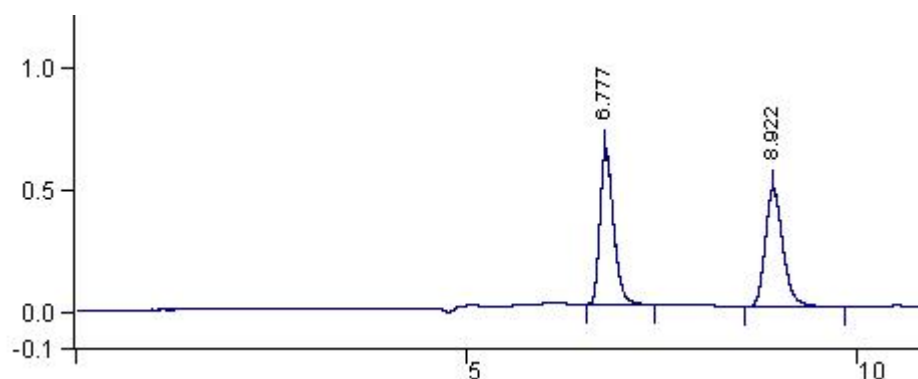

| Peak No. | Peak Name | Result ( ) | Ret. Time (min) | Time Offset (min) | Area (counts) | Sep. Code | Width 1/2 (sec) | Status Codes |
|----------|-----------|------------|-----------------|-------------------|---------------|-----------|-----------------|--------------|
| 1        |           | 50.1027    | 6.777           | 0.000             | 7742906       | BB        | 11.0            |              |
| 2        |           | 49.8973    | 8.922           | 0.000             | 7711178       | BB        | 14.3            |              |
| Totals:  |           | 100.0000   |                 | 0.000             | 15454084      |           |                 |              |

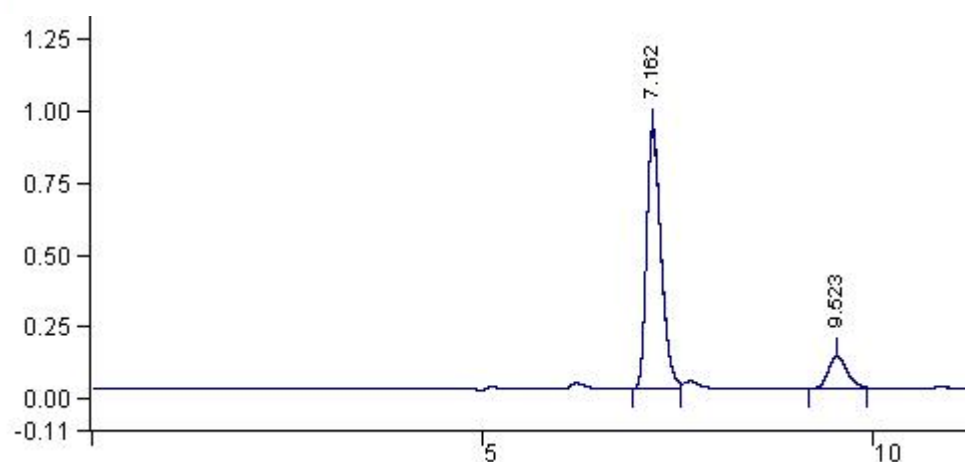



| Peak No. | Peak Name | Result ( ) | Ret. Time (min) | Time Offset (min) | Area (counts) | Sep. Code | Width 1/2 (sec) | Status Codes |
|----------|-----------|------------|-----------------|-------------------|---------------|-----------|-----------------|--------------|
| 1        |           | 86.5055    | 7.162           | 0.000             | 11755970      | BB        | 11.8            |              |
| 2        |           | 13.4945    | 9.523           | 0.000             | 1833881       | BB        | 15.4            |              |
| Totals:  |           | 100.0000   |                 | 0.000             | 13589851      |           |                 |              |

## V. General procedure for the three-component AAA reactions:

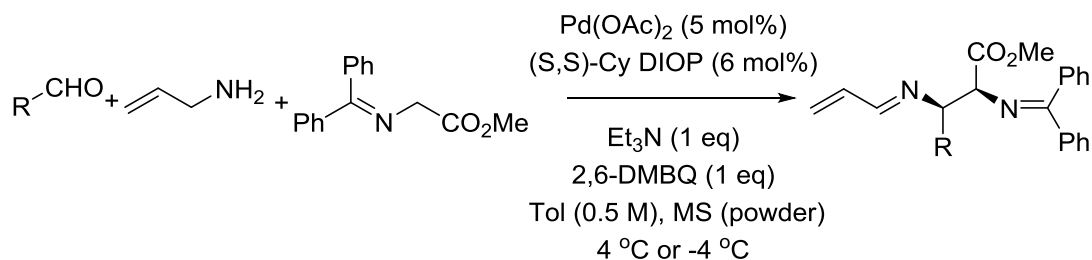

An oven dried Pyrex microwave vial was charged with Pd(OAc)<sub>2</sub> (3.4 mg, 0.015 mmol), (S,S)-Cy DIOP (10.1 mg, 0.018 mmol), 2,6-dimethylbenzoquinone (42 mg, 0.3 mmol) and molecular sieve (4 Å, 120 mg) was sealed with a rubber septa. The vial was evacuated and filled with nitrogen three times in an interval of 10 min. In a separate sealed nitrogen flushed vial, aldehyde (0.3 mmol), allyl amine (0.3 mmol) and glycinate **2e** (0.3 mmol) were dissolved in freshly distilled toluene (0.6 ml). The solution was cannulated to the microwave vial with palladium catalyst. Et<sub>3</sub>N (30 mg, 0.3 mmol) was added to the resulting turbid solution and was allowed to stir at 4 °C or -4 °C for 35-60h. Upon completion (monitored by crude NMR), solvent was removed in vacuo and the residue was purified by flash chromatography over silica gel (pre-neutralized with 3% Et<sub>3</sub>N in Hexanes), eluting with EtOAc / hexanes/ Et<sub>3</sub>N, to give the product.

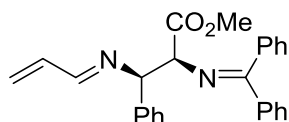

### Methyl (2S,3R)-3-(((E)-allylidene)amino)-2-((diphenylmethylene)amino)-3-phenylpropanoate (**6a**)

The reaction was performed with allyl amine (17.1 mg, 0.3 mmol), benzaldehyde (31.8 mg, 0.3 mmol), methyl glycinate (75.3 mg, 0.3 mmol), Pd(OAc)<sub>2</sub> (3.4 mg, 0.015 mmol),



(S,S)-Cy DIOP (10.1 mg, 0.018 mmol), 2,6-dimethylbenzoquinone (40.8 mg, 0.3 mmol), Et<sub>3</sub>N (30.3 mg, 0.3 mmol) and molecular sieve (4 Å, 120 mg) in toluene (0.6 mL) for 36 h at 4°C. After removing the solvent, purification by flash chromatography (EtOAc / hexanes / Et<sub>3</sub>N = 5/95/1) gave product (69 mg, 58%) as a colorless oil.  $\alpha_D^{25} = -32.4$  ( $c = 1.0$ , CHCl<sub>3</sub>). <sup>1</sup>H NMR (500 MHz, d-CDCl<sub>3</sub>)  $\delta$  8.06 (d,  $J = 9.0$  Hz, 1H), 7.61 (dd,  $J = 8.5, 1.5$  Hz, 2H), 7.45-7.47 (m, 3H), 7.39-7.42 (m, 1H), 7.32-7.35 (m, 4H), 7.27-7.29 (m, 2H), 7.23-7.25 (m, 1H), 7.08-7.10 (m, 2H), 6.51-6.58 (m, 1H), 5.73 (d,  $J = 10.5$  Hz, 1H), 5.67 (d,  $J = 17.5$  Hz, 1H), 4.91 (d,  $J = 8.0$  Hz, 1H), 4.58 (d,  $J = 8.0$  Hz, 1H), 3.54 (s, 3H). <sup>13</sup>C NMR (125 MHz, CDCl<sub>3</sub>)  $\delta$  172.3, 170.9, 164.7, 140.2, 139.8, 137.1, 136.5, 130.6, 129.1, 128.9, 128.6, 128.5, 128.3, 128.3, 128.2, 127.9, 127.8, 78.0, 72.0, 52.2.

The analytical data of the compound **6a** was in complete agreement with compound **3b**.

Enantiomeric excess was determined by using HPLC with a chiral stationary phase. Stationary phase (AD column, flow rate = 1.0 mL/min, eluent: Hept/*i*-PrOH/Et<sub>3</sub>N = 100/1/0.1, 254 nm absorbance). Major enantiomer ( $t_R = 33.5$  min), minor enantiomer ( $t_R = 38.1$  min): er = 92:8.

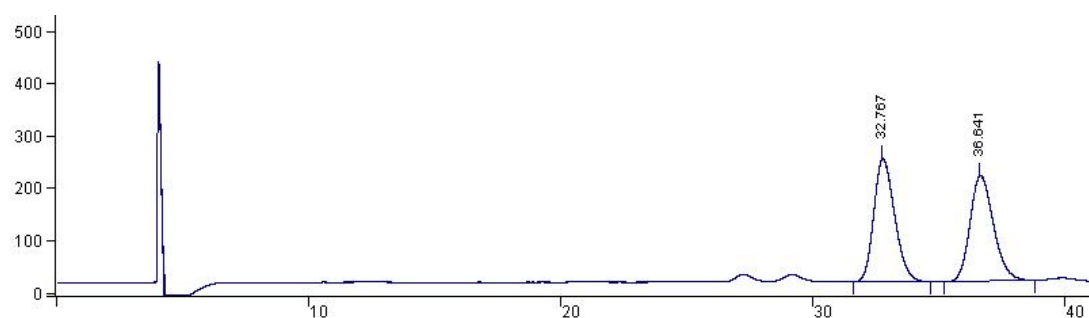

| Peak No. | Peak Name | Result ( ) | Ret. Time (min) | Time Offset (min) | Area (counts) | Sep. Code | Width 1/2 (sec) | Status Codes |
|----------|-----------|------------|-----------------|-------------------|---------------|-----------|-----------------|--------------|
| 1        |           | 50.9083    | 32.767          | 0.000             | 13604943      | BB        | 56.7            |              |
| 2        |           | 49.0917    | 36.641          | 0.000             | 13119480      | BB        | 61.4            |              |
| Totals:  |           | 100.0000   |                 | 0.000             | 26724423      |           |                 |              |



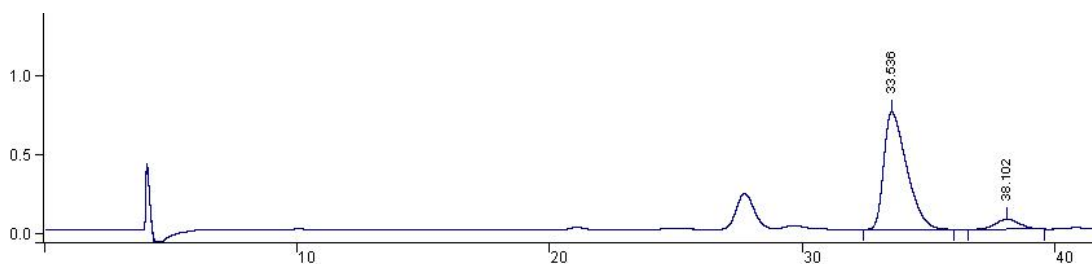

| Peak No. | Peak Name | Result ( ) | Ret. Time (min) | Time Offset (min) | Area (counts) | Sep. Code | Width 1/2 (sec) | Status Codes |
|----------|-----------|------------|-----------------|-------------------|---------------|-----------|-----------------|--------------|
| 1        |           | 91.6614    | 33.536          | 0.000             | 47177608      | BB        | 66.1            |              |
| 2        |           | 8.3386     | 38.102          | 0.000             | 4291805       | BB        | 63.9            |              |
| Totals:  |           | 100.0000   |                 | 0.000             | 51469413      |           |                 |              |

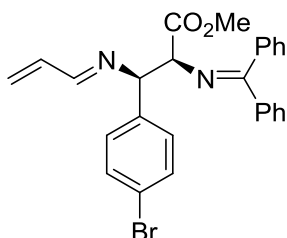

**Methyl (2S,3R)-3-(((E)-allylidene)amino)-2-((diphenylmethylene)amino)-3-(4-bromophenyl)propanoate (6b)**

The reaction was performed with allyl amine (17.1 mg, 0.3 mmol), 4-bromobenzaldehyde (55.5 mg, 0.3 mmol), methyl glycinate (75.3 mg, 0.3 mmol), Pd(OAc)<sub>2</sub> (3.4 mg, 0.015 mmol), (S,S)-Cy DIOP (10.1 mg, 0.018 mmol), 2,6-dimethylbenzoquinone (40.8 mg, 0.3 mmol), Et<sub>3</sub>N (30.3 mg, 0.3 mmol) and molecular sieve (4 Å, 120 mg) in toluene (0.6 mL) for 42 h at -4 °C. After removing the solvent, purification by flash chromatography (EtOAc / hexanes / Et<sub>3</sub>N = 5/95/1) gave product (99.8 mg, 70%) as a colorless oil.  $\alpha_D^{25} = -101.2$  ( $c = 3.0$ , CHCl<sub>3</sub>). <sup>1</sup>H NMR (500 MHz, d-CDCl<sub>3</sub>)  $\delta$  8.02 (d,  $J = 9.0$  Hz, 1H), 7.59 (d,  $J = 9.0$  Hz, 2H), 7.45-7.47 (m, 3H), 7.39-7.41 (m, 3H), 7.32-7.35 (m, 2H), 7.21 (d,  $J = 7.5$  Hz, 2H), 7.08-7.10 (m, 2H), 6.48-6.58 (m, 1H), 5.73 (d,  $J = 10.0$  Hz, 1H), 5.66 (d,  $J = 17.0$  Hz, 1H), 4.85 (d,  $J = 8.0$  Hz, 1H), 4.51 (d,  $J = 8.0$  Hz, 1H), 3.58 (s, 3H). <sup>13</sup>C NMR (125 MHz, CDCl<sub>3</sub>)  $\delta$  172.6, 170.7, 165.2, 142.6, 139.6, 137.0, 136.3, 131.6, 131.3, 130.8, 130.0, 129.1, 129.0, 128.6, 128.1, 126.9, 122.5, 77.1, 71.7, 52.3.



The analytical data of the compound **6b** was in complete agreement with compound **3g**.

Enantiomeric excess was determined by using HPLC with a chiral stationary phase. Stationary phase (AD column, flow rate = 1.0 mL/min, eluent: Hept/*i*-PrOH/Et<sub>3</sub>N = 20/1/0.1, 254 nm absorbance). Major enantiomer (tR = 9.4 min), minor enantiomer (tR = 12.7 min): er = 90 :10.

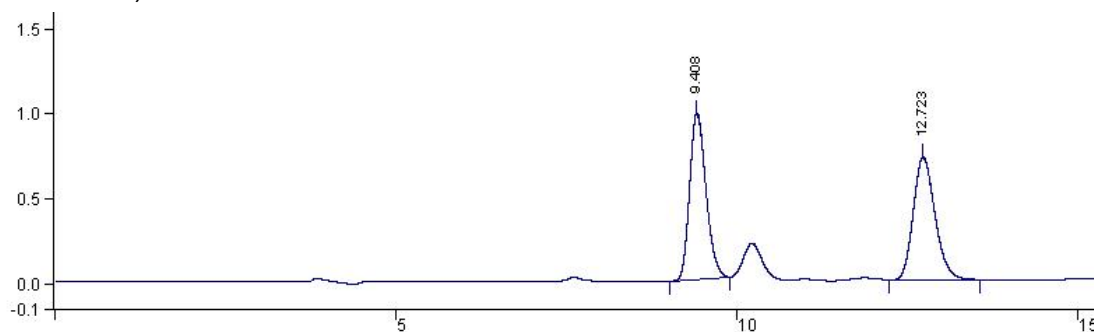

| Peak No. | Peak Name | Result ( ) | Ret. Time (min) | Time Offset (min) | Area (counts) | Sep. Code | Width 1/2 (sec) | Status Codes |
|----------|-----------|------------|-----------------|-------------------|---------------|-----------|-----------------|--------------|
| 1        |           | 50.5039    | 9.408           | 0.000             | 16373066      | BB        | 15.6            |              |
| 2        |           | 49.4961    | 12.723          | 0.000             | 16046370      | BB        | 20.4            |              |
| Totals:  |           | 100.0000   |                 | 0.000             | 32419436      |           |                 |              |

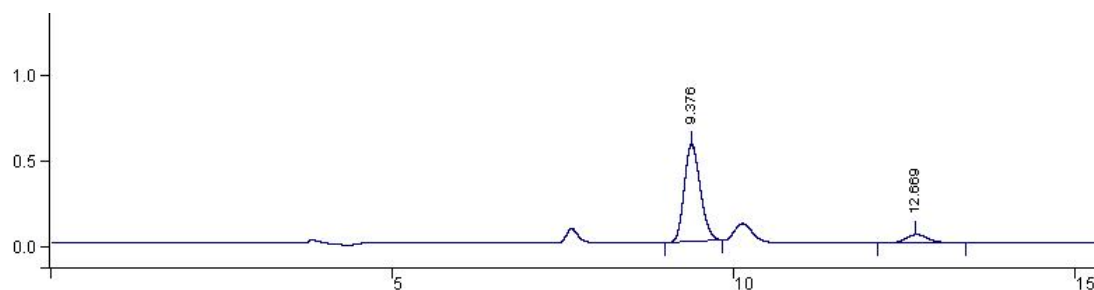

| Peak No. | Peak Name | Result ( ) | Ret. Time (min) | Time Offset (min) | Area (counts) | Sep. Code | Width 1/2 (sec) | Status Codes |
|----------|-----------|------------|-----------------|-------------------|---------------|-----------|-----------------|--------------|
| 1        |           | 89.7225    | 9.376           | 0.000             | 9443265       | BB        | 15.3            |              |
| 2        |           | 10.2775    | 12.669          | 0.000             | 1081702       | BB        | 20.3            |              |
| Totals:  |           | 100.0000   |                 | 0.000             | 10524967      |           |                 |              |



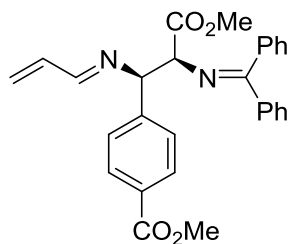

**Methyl 4-((1R,2S)-1-(((E)-allylidene)amino)-2-((diphenylmethylene)amino)-3-methoxy-3-oxopropyl)benzoate (6c)**

The reaction was performed with allyl amine (17.1 mg, 0.3 mmol), methyl 4-formylbenzoate (49.3 mg, 0.3 mmol), methyl glycinate (75.3 mg, 0.3 mmol), Pd(OAc)<sub>2</sub> (3.4 mg, 0.015 mmol), (S,S)-Cy DIOP (10.1 mg, 0.018 mmol), 2,6-dimethylbenzoquinone (40.8 mg, 0.3 mmol), Et<sub>3</sub>N (30.3 mg, 0.3 mmol) and molecular sieve (4 Å, 120 mg) in toluene (0.6 mL) 40 h at -4°C. After removing the solvent, purification by flash chromatography (EtOAc / hexanes / Et<sub>3</sub>N = 10/90/1) gave product (87.3 mg, 68%) as a colorless oil.  $\alpha_D^{25} = -95.9$  ( $c = 2.0$ , CHCl<sub>3</sub>). <sup>1</sup>H NMR (500 MHz, d-CDCl<sub>3</sub>)  $\delta$  8.05 (d,  $J = 9.0$  Hz, 1H), 7.95 (d,  $J = 8.5$  Hz, 2H), 7.60 (d,  $J = 8.5$  Hz, 2H), 7.44-7.46 (m, 3H), 7.39-7.43 (m, 3H), 7.31-7.35 (m, 2H), 7.05-7.08 (m, 2H), 6.51-6.59 (m, 1H), 5.75 (d,  $J = 10.5$  Hz, 1H), 5.69 (d,  $J = 17.5$  Hz, 1H), 4.96 (d,  $J = 7.5$  Hz, 1H), 4.55 (d,  $J = 7.5$  Hz, 1H), 3.90 (s, 3H), 3.54 (s, 3H). <sup>13</sup>C NMR (125 MHz, CDCl<sub>3</sub>)  $\delta$  172.1, 170.6, 167.1, 165.2, 145.4, 139.6, 137.0, 136.3, 130.7, 129.8, 129.5, 129.1, 128.9, 128.6, 128.3, 128.2, 128.1, 128.1, 77.5, 71.2, 52.3.

The analytical data of the compound **6c** was in complete agreement with compound **3c**.

Enantiomeric excess was determined by using HPLC with a chiral stationary phase. Stationary phase (AD column, flow rate = 1.0 mL/min, eluent: Hept/*i*-PrOH/Et<sub>3</sub>N = 20/1/0.1, 254 nm absorbance). Major enantiomer (t<sub>R</sub> = 18.1 min), minor enantiomer (t<sub>R</sub> = 28.8 min): er = 92:8.



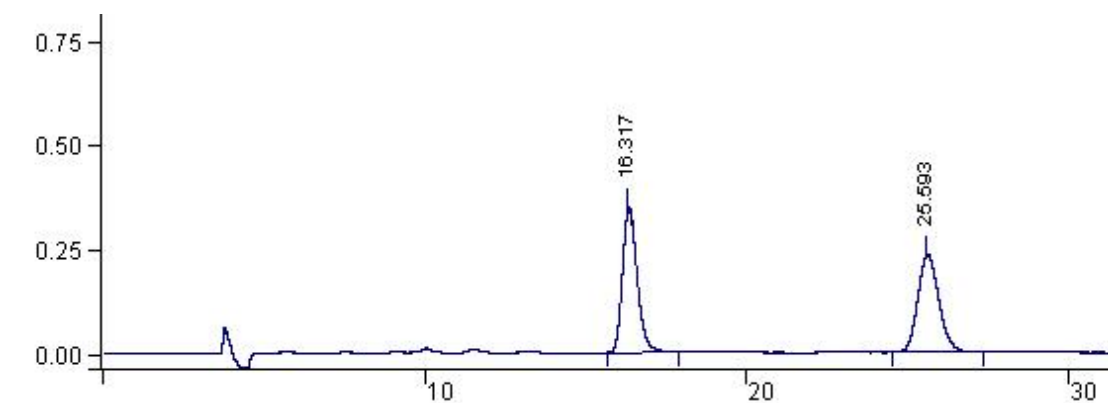

| Peak No. | Peak Name | Result ( ) | Ret. Time (min) | Time Offset (min) | Area (counts) | Sep. Code | Width 1/2 (sec) | Status Codes |
|----------|-----------|------------|-----------------|-------------------|---------------|-----------|-----------------|--------------|
| 1        |           | 50.9142    | 16.317          | 0.000             | 11111619      | BB        | 29.4            |              |
| 2        |           | 49.0858    | 25.593          | 0.000             | 10712607      | BB        | 42.1            |              |
| Totals:  |           | 100.0000   |                 | 0.000             | 21824226      |           |                 |              |

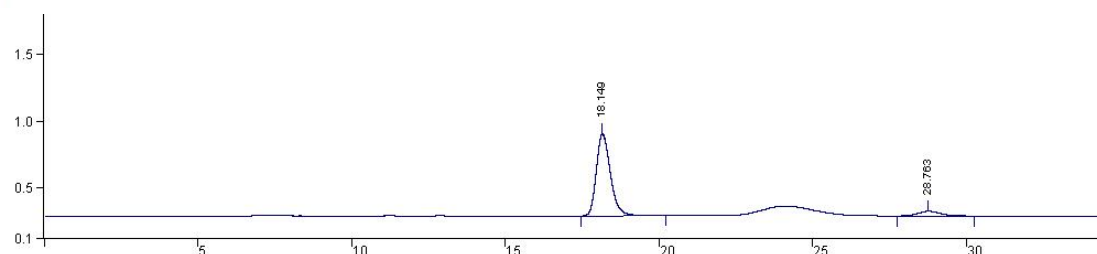

| Peak No. | Peak Name | Result ( ) | Ret. Time (min) | Time Offset (min) | Area (counts) | Sep. Code | Width 1/2 (sec) | Status Codes |
|----------|-----------|------------|-----------------|-------------------|---------------|-----------|-----------------|--------------|
| 1        |           | 92.0109    | 18.149          | 0.000             | 19624650      | BB        | 29.3            |              |
| 2        |           | 7.9891     | 28.763          | 0.000             | 1703957       | BB        | 45.3            |              |
| Totals:  |           | 100.0000   |                 | 0.000             | 21328607      |           |                 |              |

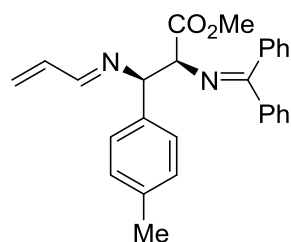

**Methyl (2S,3R)-3-(((E)-allylidene)amino)-2-((diphenylmethylene)amino)-3-(4-methylphenyl)propanoate (6d)**

The reaction was performed with allyl amine (17.1 mg, 0.3 mmol), 4-methylbenzaldehyde (36.1 mg, 0.3 mmol), methyl glycinate (75.3 mg, 0.3 mmol), Pd(OAc)<sub>2</sub> (3.4 mg, 0.015 mmol), (S,S)-Cy DIOP (10.1 mg, 0.018 mmol),



2,6-dimethylbenzoquinone (40.8 mg, 0.3 mmol), Et<sub>3</sub>N (30.3 mg, 0.3 mmol) and molecular sieve (4 Å, 120 mg) in toluene (0.6 mL) for 40 h at 4°C. After removing the solvent, purification by flash chromatography (EtOAc / hexanes /Et<sub>3</sub>N = 5/95/1) gave product (64 mg, 52%) as a colorless oil.  $\alpha_D^{25} = -55.4$  ( $c = 1.0$ , CHCl<sub>3</sub>). <sup>1</sup>H NMR (400 MHz, d-CDCl<sub>3</sub>)  $\delta$  8.01 (d,  $J = 8.8$  Hz, 1H), 7.57 (d,  $J = 8.0$  Hz, 2H), 7.42-7.44 (m, 3H), 7.35-7.38 (m, 1H), 7.28-7.33 (m, 2H), 7.18 (d,  $J = 8.4$  Hz, 2H), 7.04-7.10 (m, 4H), 6.45-6.54 (m, 1H), 5.68 (d,  $J = 10.0$  Hz, 1H), 5.63 (d,  $J = 17.2$  Hz, 1H), 4.84 (d,  $J = 8.0$  Hz, 1H), 4.54 (d,  $J = 8.0$  Hz, 1H), 3.52 (s, 3H), 2.27 (s, 3H). <sup>13</sup>C NMR (125 MHz, CDCl<sub>3</sub>)  $\delta$  172.2, 171.0, 164.5, 139.9, 137.3, 137.2, 137.1, 136.5, 130.5, 129.2, 129.1, 128.8, 128.5, 128.3, 128.1, 128.1, 127.8, 77.7, 72.1, 52.1, 21.3.

The analytical data of the compound **6d** was in complete agreement with compound **3e**.

Enantiomeric excess was determined by using HPLC with a chiral stationary phase. Stationary phase (AD column, flow rate = 1.0 mL/min, eluent: Hept/*i*-PrOH/Et<sub>3</sub>N = 40/1/0.1, 254 nm absorbance). Major enantiomer ( $t_R = 16.0$  min), minor enantiomer ( $t_R = 20.3$  min): er = 88.5 :11.5.

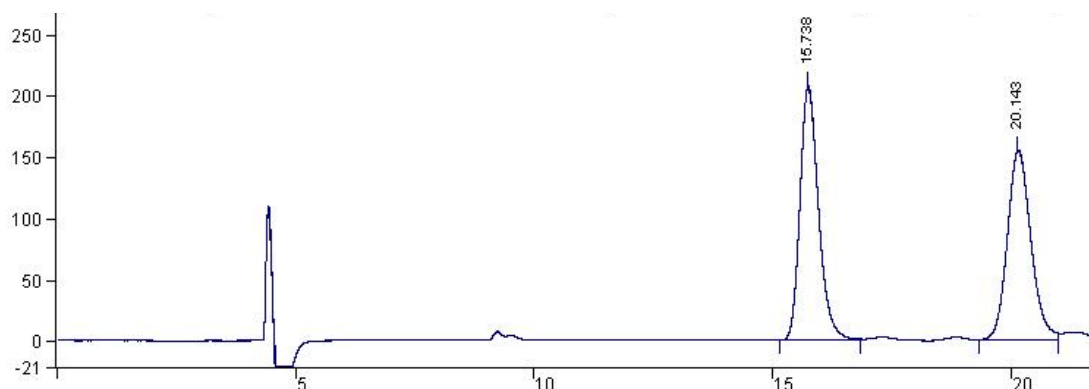

| Peak No. | Peak Name | Result ( ) | Ret. Time (min) | Time Offset (min) | Area (counts) | Sep. Code | Width 1/2 (sec) | Status Codes |
|----------|-----------|------------|-----------------|-------------------|---------------|-----------|-----------------|--------------|
| 1        |           | 51.2319    | 15.738          | 0.000             | 5603092       | BB        | 24.8            |              |
| 2        |           | 48.7681    | 20.143          | 0.000             | 5333625       | BB        | 31.1            |              |
| Totals:  |           | 100.0000   |                 | 0.000             | 10936717      |           |                 |              |



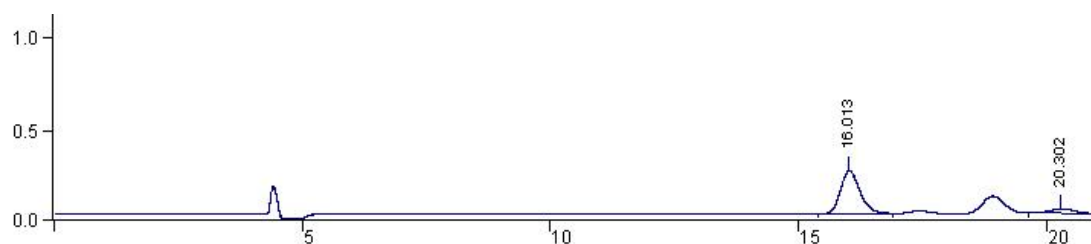

| Peak No. | Peak Name | Result ( ) | Ret. Time (min) | Time Offset (min) | Area (counts) | Sep. Code | Width 1/2 (sec) | Status Codes |
|----------|-----------|------------|-----------------|-------------------|---------------|-----------|-----------------|--------------|
| 1        |           | 88.4517    | 16.013          | 0.000             | 6268478       | BB        | 25.1            |              |
| 2        |           | 11.5483    | 20.302          | 0.000             | 818417        | BB        | 30.7            |              |
| Totals:  |           | 100.0000   |                 | 0.000             | 7086895       |           |                 |              |

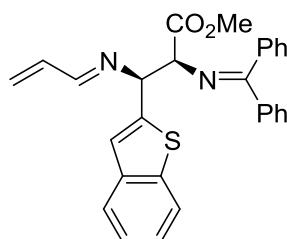

**Methyl (2S,3S)-3-(((E)-allylidene)amino)-3-(benzo[b]thiophen-2-yl)-2-((diphenylmethylene)amino)propanoate (6e)**

The reaction was performed with allyl amine (17.1 mg, 0.3 mmol), benzo[b]thiophene-2-carboxaldehyde (48.7 mg, 0.3 mmol), methyl glycinate (75.3 mg, 0.3 mmol), Pd(OAc)<sub>2</sub> (3.4 mg, 0.015 mmol), (S,S)-Cy DIOP (10.1 mg, 0.018 mmol), 2,6-dimethylbenzoquinone (40.8 mg, 0.3 mmol), Et<sub>3</sub>N (30.3 mg, 0.3 mmol) and molecular sieve (4 Å, 120 mg) in toluene (0.6 mL) for 62 h at 4 °C. After removing the solvent, purification by flash chromatography (EtOAc / hexanes / Et<sub>3</sub>N = 5/95/1) gave product (82 mg, 60%) as a colorless oil.  $\alpha_D^{25} = -43.4$  ( $c = 1.0$ , CHCl<sub>3</sub>). <sup>1</sup>H NMR (400 MHz, d-CDCl<sub>3</sub>)  $\delta$  8.05 (d,  $J = 8.8$  Hz, 1H), 7.72 (d,  $J = 8.0$  Hz, 1H), 7.67 (d,  $J = 8.0$  Hz, 1H), 7.62-7.65 (m, 2H), 7.42-7.44 (m, 3H), 7.38-7.43 (m, 1H), 7.31-7.34 (m, 2H), 7.23-7.30 (m, 3H), 7.13-7.15 (m, 2H), 6.56-6.62 (m, 1H), 5.74 (d,  $J = 10.0$  Hz, 1H), 5.68 (d,  $J = 17.2$  Hz, 1H), 5.30 (d,  $J = 7.6$  Hz, 1H), 4.61 (d,  $J = 7.6$  Hz, 1H), 3.60 (s, 3H). <sup>13</sup>C NMR (125 MHz, CDCl<sub>3</sub>)  $\delta$  172.8, 170.6, 165.4, 143.9, 140.0, 139.6, 139.4, 136.9, 136.2, 130.7, 129.2, 128.9, 128.6, 128.2, 128.1, 124.2, 124.1, 123.5, 122.4, 121.6, 72.9, 71.8, 52.4.



The analytical data of the compound **6e** was in complete agreement with compound **3n**.

Enantiomeric excess was determined by using HPLC with a chiral stationary phase. Stationary phase (AD column, flow rate = 1.0 mL/min, eluent: Hept/*i*-PrOH/Et<sub>3</sub>N = 40/1/0.1, 254 nm absorbance). Major enantiomer (t<sub>R</sub> = 21.7 min), minor enantiomer (t<sub>R</sub> = 43.6 min): er = 90 :10.

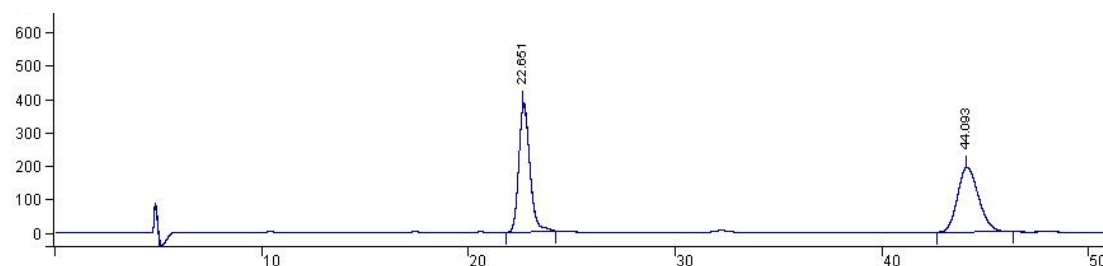

| Peak No. | Peak Name | Result ( ) | Ret. Time (min) | Time Offset (min) | Area (counts) | Sep. Code | Width 1/2 (sec) | Status Codes |
|----------|-----------|------------|-----------------|-------------------|---------------|-----------|-----------------|--------------|
| 1        |           | 50.9011    | 22.651          | 0.000             | 14306732      | BB        | 34.4            |              |
| 2        |           | 49.0989    | 44.093          | 0.000             | 13800196      | BB        | 67.6            |              |
| Totals:  |           | 100.0000   |                 | 0.000             | 28106928      |           |                 |              |

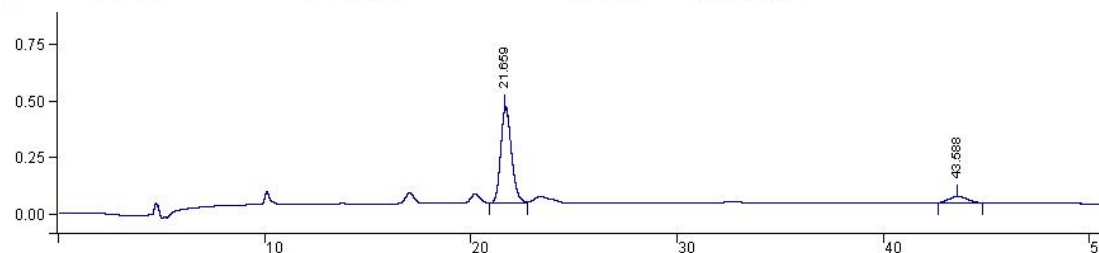

| Peak No. | Peak Name | Result ( ) | Ret. Time (min) | Time Offset (min) | Area (counts) | Sep. Code | Width 1/2 (sec) | Status Codes |
|----------|-----------|------------|-----------------|-------------------|---------------|-----------|-----------------|--------------|
| 1        |           | 89.7569    | 21.659          | 0.000             | 15366331      | BB        | 33.9            |              |
| 2        |           | 10.2431    | 43.588          | 0.000             | 1753606       | BB        | 61.4            |              |
| Totals:  |           | 100.0000   |                 | 0.000             | 17119937      |           |                 |              |

## VI. General method for synthesis of vicinal diamino derivatives:

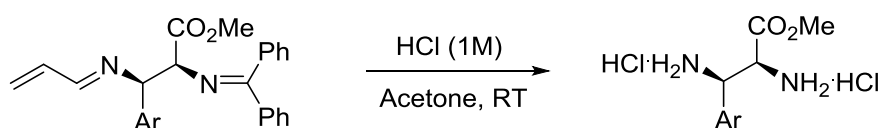

To a solution of 1-aza diene (0.3 mmol) in acetone (3 ml) was added HCl (1M, 1.2 mmol) dropwised at 0 °C. The reaction mixture was stirred at room temperature for 1 h.



The acetone was removed in vacuo and the residue was washed with Et<sub>2</sub>O (3 ml) twice. The residue was dried in vacuo to afford the product as a solid.

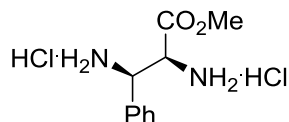

**Methyl (2S,3R)-2,3-diamino-3-phenylpropanoate dihydrochloride (7a)**

Light yellow solid, 74 mg, 92% yield, Mp = 202-204 °C.  $\alpha_D^{25} = +11.0$  (free amine,  $c = 1.0$ , CHCl<sub>3</sub>). IR: (neat) 3644, 3331, 3263, 1754, 1528, 1422 cm<sup>-1</sup>; <sup>1</sup>H NMR (500 MHz, d-DMSO)  $\delta$  9.57 (br, 3H), 9.26 (br, 3H), 7.54-7.56 (m, 2H), 7.46-7.48 (m, 3H), 5.04 (d,  $J = 7.5$  Hz, 1H), 4.82 (d,  $J = 7.5$  Hz, 1H), 3.63 (s, 3H). <sup>13</sup>C NMR (125 MHz, d-DMSO)  $\delta$  166.4, 131.4, 129.9, 128.9, 128.2, 54.5, 54.3, 53.4. HRMS (ESI+) calcd. for C<sub>10</sub>H<sub>16</sub>Cl<sub>2</sub>N<sub>2</sub>O<sub>2</sub> [M-2HCl+H] 195.1132, found 195.1128.

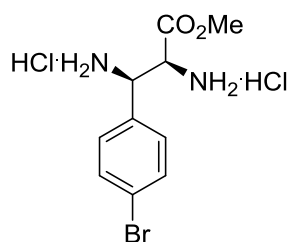

**Methyl (2S,3R)-2,3-diamino-3-(4-bromophenyl)propanoate dihydrochloride (7b)**

white solid, 93 mg, 90% yield, Mp = 214-217 °C.  $\alpha_D^{25} = +18.6$  (free amine,  $c = 1.0$ , CHCl<sub>3</sub>). IR: (neat) 3648, 3255, 2069, 1742, 1522 cm<sup>-1</sup>; <sup>1</sup>H NMR (500 MHz, d-CD<sub>3</sub>OD)  $\delta$  7.75 (d,  $J = 8.5$  Hz, 2H), 7.49 (d,  $J = 8.5$  Hz, 2H), 5.15 (d,  $J = 4.5$  Hz, 1H), 4.97 (d,  $J = 4.5$  Hz, 1H), 3.98 (s, 3H). <sup>13</sup>C NMR (125 MHz, d-CD<sub>3</sub>OD)  $\delta$  167.2, 134.1, 131.4, 130.2, 126.1, 55.3, 54.8, 54.6. HRMS (ESI+) calcd. for C<sub>10</sub>H<sub>15</sub>BrCl<sub>2</sub>N<sub>2</sub>O<sub>2</sub> [M-2HCl+H] 273.0231, found 273.0233.

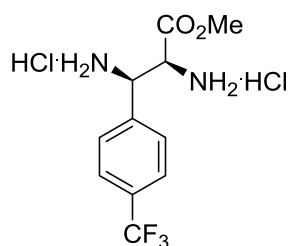



**Methyl (2S,3R)-2,3-diamino-3-(4-trifluoromethylphenyl)propanoate dihydrochloride (7c)**

Light yellow solid, 90 mg, 90% yield, Mp = 221-225 °C.  $\alpha_D^{25} = +17.4$  (free amine,  $c = 1.0$ ,  $\text{CHCl}_3$ ). IR: (neat) 3661, 3355, 2078, 1740, 1536  $\text{cm}^{-1}$ ;  $^1\text{H}$  NMR (500 MHz,  $d\text{-CD}_3\text{OD}$ )  $\delta$  7.89 (d,  $J = 8.0\text{Hz}$ , 2H), 7.81 (d,  $J = 8.0\text{Hz}$ , 2H), 5.32 (d,  $J = 5.0\text{ Hz}$ , 1H), 5.06 (d,  $J = 5.0\text{ Hz}$ , 1H), 3.97 (s, 3H).  $^{13}\text{C}$  NMR (125 MHz,  $d\text{-CD}_3\text{OD}$ )  $\delta$  167.1, 135.5, 133.5 (q,  $J = 32\text{ Hz}$ ), 130.5 (d,  $J = 12\text{ Hz}$ ), 127.8, 125.1 (d,  $J = 271\text{ Hz}$ ), 55.4, 54.9, 54.7. HRMS (ESI+) calcd. for  $\text{C}_{11}\text{H}_{15}\text{F}_3\text{Cl}_2\text{N}_2\text{O}_2$  [ $\text{M}-2\text{HCl}+\text{H}$ ] 263.1001, found 263.1002.

**Preparation of the product 3b in gram scale:**

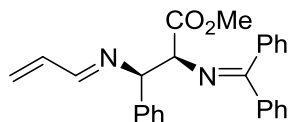

An oven dried Pyrex microwave vial was charged with  $\text{Pd}(\text{OAc})_2$  (56 mg, 0.25 mmol), (S,S)-Cy DIOP (162 mg, 0.3 mmol), 2,6-dimethylbenzoquinone (700 mg, 5 mmol) and was sealed with a rubber septa. The vial was evacuated and filled with nitrogen three times in an interval of 10 min. In a separate sealed nitrogen flushed vial, methyl glycinate (1.25 g, 5 mmol) and *N*-allyl imine (750 mg, 5 mmol) were taken in freshly distilled toluene (10 ml). The solution was cannulated to the microwave vial with palladium catalyst.  $\text{Et}_3\text{N}$  (500 mg, 5 mmol) was added to the resulting turbid solution and was allowed to stir at 4 °C for 40 h. Upon completion (monitored by crude NMR), solvent was removed in vacuo and the residue was purified by flash chromatography over silica gel (pre-neutralized with 3%  $\text{Et}_3\text{N}$  in Hexanes), eluting with  $\text{EtOAc}$  / hexanes/  $\text{Et}_3\text{N}$ , to give the product **3b** 1.33 g in 67% yield.

Enantiomeric excess was determined by using HPLC. Stationary phase (AD column, flow rate = 1.0 mL/min, eluent:  $\text{Hept}/i\text{-PrOH}/\text{Et}_3\text{N} = 100/1/0.1$ , 254 nm absorbance). Major enantiomer ( $t_R = 33.5\text{ min}$ ), minor enantiomer ( $t_R = 38.1\text{ min}$ ): er = 92:8.



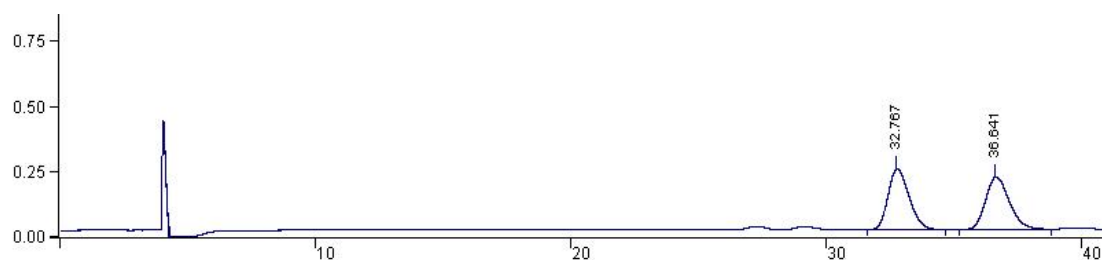

| Peak No. | Peak Name | Result ( ) | Ret. Time (min) | Time Offset (min) | Area (counts) | Sep. Code | Width 1/2 (sec) | Status Codes |
|----------|-----------|------------|-----------------|-------------------|---------------|-----------|-----------------|--------------|
| 1        |           | 50.9083    | 32.767          | 0.000             | 13604943      | BB        | 56.7            |              |
| 2        |           | 49.0917    | 36.641          | 0.000             | 13119480      | BB        | 61.4            |              |
| Totals:  |           | 100.0000   |                 | 0.000             | 26724423      |           |                 |              |

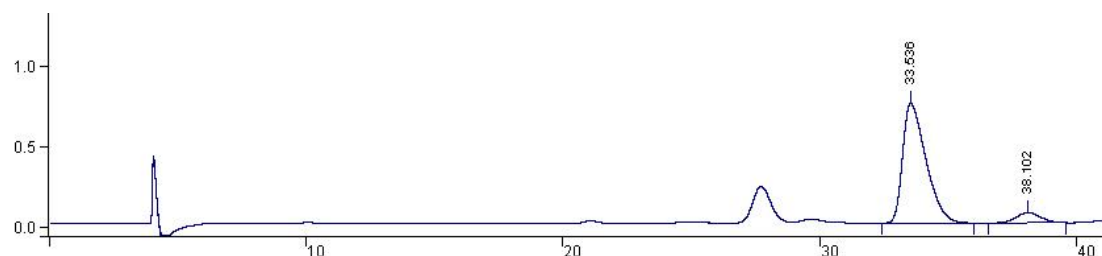

| Peak No. | Peak Name | Result ( ) | Ret. Time (min) | Time Offset (min) | Area (counts) | Sep. Code | Width 1/2 (sec) | Status Codes |
|----------|-----------|------------|-----------------|-------------------|---------------|-----------|-----------------|--------------|
| 1        |           | 91.6614    | 33.536          | 0.000             | 47177608      | BB        | 66.1            |              |
| 2        |           | 8.3386     | 38.102          | 0.000             | 4291805       | BB        | 63.9            |              |
| Totals:  |           | 100.0000   |                 | 0.000             | 51469413      |           |                 |              |

#### Determination of relative and absolute configuration of AAA products:

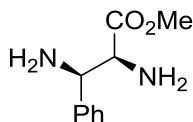

The relative stereochemistry of both diastereomers were determined by comparing the  $^1\text{H}$  NMR spectra of diamines **7a** with the ones obtained from literature.<sup>4</sup> The free diamines were obtained by dissolving the diaminium salts in 1 N NaOH solution and extraction with  $\text{CH}_2\text{Cl}_2$  for three times.

Major diastereomer:  $^1\text{H}$  NMR (500 MHz,  $\text{d-CDCl}_3$ )  $\delta$  7.28-7.36 (m, 5H), 4.30 (d,  $J$  = 4.5 Hz, 1H), 3.67 (s, 3H), 3.65 (d,  $J$  = 4.5 Hz, 1H), 1.71 (brs, 4H).  $^{13}\text{C}$  NMR (125 MHz,



d-CDCl<sub>3</sub>)  $\delta$  174.6, 142.8, 128.7, 127.6, 126.9, 61.0, 58.4, 52.3.

The spectra data of the compound was in complete agreement with the literature of *cis*-diamine.<sup>4a</sup>

Minor diastereomer: <sup>1</sup>H NMR (500 MHz, d-CDCl<sub>3</sub>)  $\delta$  7.28-7.36 (m, 5H), 4.25 (d, *J* = 6.0 Hz, 1H), 3.71 (d, *J* = 6.0 Hz, 1H), 3.70 (s, 3H).

The spectra data of the compound was in complete agreement with the literature of *trans*-diamine.<sup>4b</sup>

The absolute configuration was established by its optical rotation of  $\alpha_D^{25} = +11.0^\circ$  (*c* = 1.0, CHCl<sub>3</sub>, 92:8 *er*) which agrees with that reported for the *S,R*-isomer  $\alpha_D^{25} = +16.0^\circ$  (*c* = 1.0, CHCl<sub>3</sub>, >99%*ee*).<sup>5</sup>

## VII. Structural Derivatization of AAA products

### General procedure for reduction with NaBH<sub>4</sub>:

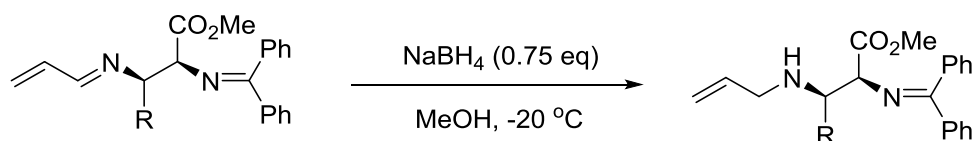

To a solution of 1-aza diene (0.3 mmol) in MeOH (1.5 ml) was added NaBH<sub>4</sub> (8.6 mg, 0.21 mmol) at -20 °C. The reaction mixture was stirred for 15 min. The methanol was removed in vacuo and the residue was washed with DCM (3 ml) twice. The dichloromethane solution was dried in vacuo and purified by flashing chromatography.

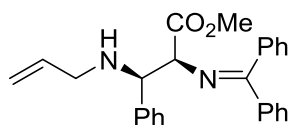

### Methyl (2*S*,3*R*)-3-(allylamino)-2-((diphenylmethylene)amino)-3-

### Phenylpropanoate (8a)

Colorless oil. 74 mg, 62% yield.  $\alpha_D^{25} = -79.7$  (*c* = 1.2, CHCl<sub>3</sub>). IR: (neat) 3361, 3061, 2952, 1741, 1448 cm<sup>-1</sup>; <sup>1</sup>H NMR (400 MHz, d-CDCl<sub>3</sub>)  $\delta$  7.64 (dd, *J* = 8.0, 1.6 Hz, 2H), 7.39-7.41 (m, 1H), 7.32-7.36 (m, 3H), 7.27-7.32 (m, 3H), 7.22-7.25 (m, 2H), 7.15-7.18



(m, 2H), 6.60 (d,  $J = 6.8$  Hz, 2H), 5.82-5.92 (m, 1H), 5.09-5.15 (m, 1H), 5.04-5.07 (m, 1H), 4.44 (d,  $J = 4.8$  Hz, 1H), 4.17 (d,  $J = 4.8$  Hz, 1H), 3.64 (s, 3H), 3.20-3.26 (m, 1H), 2.99-3.05 (m, 1H).  $^{13}\text{C}$  NMR (125 MHz,  $\text{d-CDCl}_3$ )  $\delta$  172.2, 171.6, 140.5, 139.3, 137.3, 136.2, 130.7, 129.1, 128.6, 128.5, 128.4, 128.3, 128.1, 127.6, 127.4, 115.8, 71.6, 64.4, 52.2, 49.6. HRMS (ESI+) calcd. for  $\text{C}_{26}\text{H}_{26}\text{N}_2\text{O}_2$   $[\text{M}+\text{Na}]$  421.1870, found 421.1882.

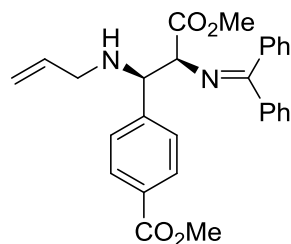

**Methyl 4-((1R,2S)-1-(allylamino)-2-((diphenylmethylene)amino)-3-methoxy-3-oxopropyl)benzoate (8b)**

Colorless oil. 82 mg, 63% yield.  $\alpha_{\text{D}}^{25} = -93.8$  ( $c = 1.0$ ,  $\text{CHCl}_3$ ). IR: (neat) 3364, 3002, 2951, 1724, 1440  $\text{cm}^{-1}$ ;  $^1\text{H}$  NMR (500 MHz,  $\text{d-CDCl}_3$ )  $\delta$  7.95 (d,  $J = 8.5$  Hz, 2H), 7.65 (dd,  $J = 8.5, 3.5$  Hz, 2H), 7.47-7.52 (m, 1H), 7.42-7.45 (m, 1H), 7.35-7.38 (m, 3H), 7.30-7.32 (m, 3H), 6.64 (d,  $J = 7.0$  Hz, 2H), 5.84-5.92 (m, 1H), 5.11-5.15 (m, 1H), 5.07-5.10 (m, 1H), 4.52 (d,  $J = 5.5$  Hz, 1H), 4.21 (d,  $J = 5.5$  Hz, 1H), 3.92 (s, 3H), 3.68 (s, 3H), 3.23-3.27 (m, 1H), 3.01-3.06 (m, 1H).  $^{13}\text{C}$  NMR (125 MHz,  $\text{d-CDCl}_3$ )  $\delta$  172.6, 171.3, 167.2, 146.3, 139.1, 137.0, 136.0, 130.9, 129.7, 129.3, 129.1, 128.8, 128.6, 128.3, 128.2, 127.5, 116.1, 71.2, 64.1, 52.4, 52.3, 49.7. HRMS (ESI+) calcd. for  $\text{C}_{28}\text{H}_{28}\text{N}_2\text{O}_4$   $[\text{M}+\text{H}]$  457.2122, found 457.2113.

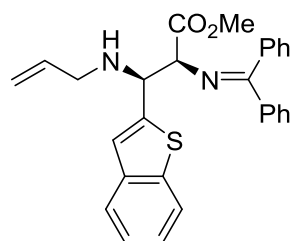

**Methyl (2S,3S)-3-(allylamino)-3-(benzo[b]thiophen-2-yl)-2-((diphenylmethylene)amino)propanoate (8c)**

Colorless oil. 79 mg, 58% yield.  $\alpha_{\text{D}}^{25} = -77.1$  ( $c = 1.0$ ,  $\text{CHCl}_3$ ). IR: (neat) 3338, 3060, 2918, 1741, 1625  $\text{cm}^{-1}$ ;  $^1\text{H}$  NMR (400 MHz,  $\text{d-CDCl}_3$ )  $\delta$  7.71-7.75 (m, 3H), 7.66 (dd,  $J$



= 7.2, 1.2 Hz, 1H), 7.42-7.45 (m, 1H), 7.38-7.40 (m, 2H), 7.34-7.36 (m, 1H), 7.30-7.33 (m, 3H), 7.27-7.29 (m, 1H), 7.23-7.26 (m, 1H), 6.89 (d,  $J$  = 6.8 Hz, 2H), 5.82-5.92 (m, 1H), 5.15-5.19 (m, 1H), 5.08-5.11 (m, 1H), 4.75 (d,  $J$  = 4.0 Hz, 1H), 4.38 (d,  $J$  = 4.0 Hz, 1H), 3.68 (s, 3H), 3.31-3.36 (m, 1H), 3.10-3.15 (m, 1H).  $^{13}\text{C}$  NMR (100 MHz,  $\text{d-CDCl}_3$ )  $\delta$  173.3, 171.2, 146.5, 140.2, 139.5, 139.3, 137.1, 136.2, 130.9, 129.4, 128.8, 128.7, 128.3, 127.6, 124.2, 124.0, 123.4, 122.6, 122.5, 116.3, 70.8, 60.4, 52.5, 49.5. HRMS (ESI+) calcd. for  $\text{C}_{28}\text{H}_{26}\text{N}_2\text{O}_2\text{S}$   $[\text{M}+\text{H}]$  455.1788, found 455.1779.

#### Derivatization procedure for product 8a:

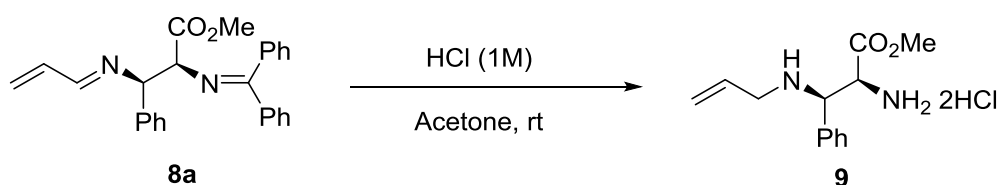

To a solution of 1-aza diene **8a** (40mg, 0.1 mmol) in acetone (1 ml) was added HCl (1M, 0.4 mmol) dropwisely at 0 °C. The reaction mixture was stirred at room temperature for 1 h. The acetone was removed in vacuo and the residue was washed with  $\text{Et}_2\text{O}$  (3 ml) twice. The residue was dried in vacuo to afford the product as a white solid.

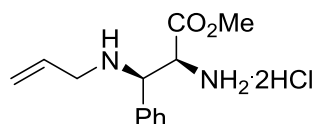

#### Methyl (2S,3R)-3-(allylamino)-2-amino-3-phenylpropanoate dihydrochloride (9)

White solid, 22 mg, 95% yield, Mp = 210-212 °C.  $\alpha_{\text{D}}^{25} = +15.0$  (free amine,  $c = 0.2$ ,  $\text{CHCl}_3$ ). IR: (neat) 3318, 2921, 2853, 1737, 1450  $\text{cm}^{-1}$ ;  $^1\text{H}$  NMR (500 MHz,  $\text{d-CD}_3\text{OD}$ )  $\delta$  7.57-7.62 (m, 3H), 7.45-7.47 (m, 2H), 5.99-6.07 (m, 1H), 5.56 (d,  $J$  = 10.0 Hz, 1H), 5.49 (d,  $J$  = 17.0 Hz, 1H), 5.03 (d,  $J$  = 4.5 Hz, 1H), 4.94 (d,  $J$  = 5.0 Hz, 1H), 3.98 (s, 3H).  $^{13}\text{C}$  NMR (125 MHz,  $\text{d-CD}_3\text{OD}$ )  $\delta$  167.3, 132.7, 131.4, 130.2, 128.7, 128.2, 126.0, 61.0, 54.6, 50.6. HRMS (ESI+) calcd. for  $\text{C}_{13}\text{H}_{18}\text{Cl}_2\text{N}_2\text{O}_2$   $[\text{M}-2\text{HCl}+\text{H}]$  235.1441, found 235.1441.



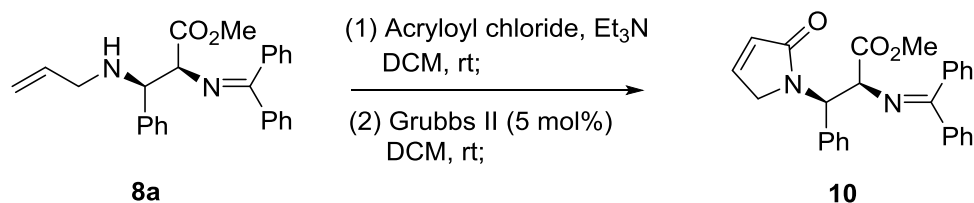

To a solution of allyl amine substrate **8a** (40 mg, 0.1 mmol) in DCM (1 ml) was added acryloyl chloride (9 mg, 0.1 mmol) dropwised at 0 °C. The reaction mixture was stirred at room temperature for 1 h. The reaction mixture was filtered through a short pad of silica gel and washed with DCM (5 ml). The solvent was removed in vacuo and the residue was used directly for the next step.

To a solution of the above residue in degassed DCM (3 ml) was added Grubbs II cat (4.2 mg, 0.005 mmol) under argon protection. The reaction mixture was stirred at room temperature for 6h. The reaction mixture was filtered through a short pad of Celite and washed with DCM (5 ml). The residue was dried in vacuo and purified by flashing chromatography.

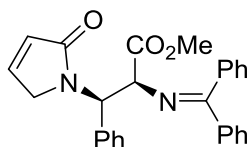

**Methyl (2S,3R)-2-((diphenylmethylene)amino)-3-(2-oxo-2,5-dihydro-1H-pyrrol-1-yl)-3-phenylpropanoate (10)**

Colorless oil, 31 mg, 73% yield over two steps.  $\alpha_D^{25} = -98.6$  ( $c = 1.0$ ,  $\text{CHCl}_3$ ). IR: (neat) 3059, 2922, 1742, 1689, 1621, 1445  $\text{cm}^{-1}$ ;  $^1\text{H}$  NMR (400 MHz,  $\text{d-CDCl}_3$ )  $\delta$  7.55 (dd,  $J = 8.4, 1.6$  Hz, 2H), 7.44 (dd,  $J = 5.6, 1.2$  Hz, 2H), 7.38-7.40 (m, 1H), 7.30-7.34 (m, 2H), 7.22-7.26 (m, 4H), 7.14-7.17 (m, 2H), 7.04-7.06 (m, 1H), 7.01-7.03 (m, 2H), 6.16 (d,  $J = 6.0$  Hz, 1H), 6.06 (d,  $J = 5.6$  Hz, 1H), 4.85 (d,  $J = 6.0$  Hz, 1H), 4.31 (dt,  $J = 20.8, 2.0$  Hz, 1H), 3.99 (dt,  $J = 20.4, 2.0$  Hz, 1H), 3.62 (s, 3H).  $^{13}\text{C}$  NMR (100 MHz,  $\text{d-CDCl}_3$ )  $\delta$  172.6, 171.7, 170.9, 144.1, 139.7, 137.9, 135.9, 130.8, 129.3, 129.3, 128.8, 128.8, 128.4, 128.1, 127.9, 127.3, 68.0, 57.1, 52.6, 52.1. HRMS (ESI+) calcd. for  $\text{C}_{27}\text{H}_{24}\text{N}_2\text{O}_3$   $[\text{M}+\text{H}]$  425.1860, found 425.1849.



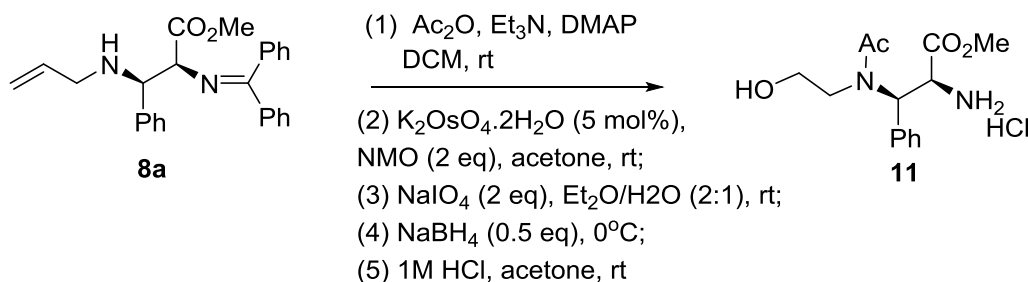

To a solution of allyl amine substrate **8a** (40 mg, 0.1 mmol) in  $\text{CH}_2\text{Cl}_2$  (0.5 ml) was added acetic anhydride (15 mg, 0.15 mmol), DMAP (1.2 mg, 0.01 mmol) and  $\text{Et}_3\text{N}$  (30 mg, 0.3 mmol) at rt. The reaction mixture was stirred at rt for 6h. Water was added to the reaction mixture and it was extracted with EtOAc (10ml X 3). The organic layers were dried by  $\text{Na}_2\text{SO}_4$  and evaporated under vacuum, and the residue was used for the next step.

A solution of  $\text{K}_2\text{OsO}_4 \cdot 2\text{H}_2\text{O}$  (2 mg, 0.005 mmol) and NMO (23.4 mg, 0.2 mmol) in water (0.1 ml) was added dropwise to a solution of **8a** acetate in acetone (1 ml). The reaction was stirred for 4h at rt.  $\text{Na}_2\text{S}_2\text{O}_4$  (1ml, 2M solution) was added, the mixture was stirred for 30 min and then filtered through a pad of Celite, the solvent was removed in vacuo.

The crude product was dissolved in  $\text{Et}_2\text{O}/\text{H}_2\text{O}$  (1ml, 2:1).  $\text{NaIO}_4$  (43 mg, 0.2 mmol) was added, and the reaction mixture was vigorously stirred for 1h at rt. Water (5 ml) and EtOAc (5 ml) was added, the aqueous layer was separated and extracted with EtOAc (3 X 5 ml). The organic layers were dried by  $\text{Na}_2\text{SO}_4$  and concentrated in vacuo.

To a solution of the crude residue in MeOH (0.5 ml) was added  $\text{NaBH}_4$  (2 mg, 0.05 mmol) at 0 °C. The reaction mixture was stirred for 5 min. The methanol was removed in vacuo and the residue was washed with DCM (3 ml) twice. The residue was dried in vacuo.

The residue was dissolved in acetone (1 ml) was added HCl (1M, 0.4 mmol) dropwise at 0 °C. The reaction mixture was stirred at room temperature for 1 h. The acetone was removed in vacuo and the residue was washed with  $\text{Et}_2\text{O}$  (3 ml) twice. The residue was dried in vacuo to afford the product as a white solid.



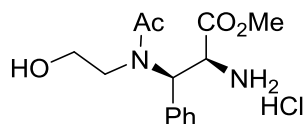

**Methyl (2S,3R)-2-amino-3-(N-(2-hydroxyethyl)acetamido)-3-phenylpropanoate (11)**

White solid, mp = 200-202 °C. 17 mg, 55% yield over five steps.  $\alpha_D^{25} = 13.8$  ( $c = 1.0$ , CHCl<sub>3</sub>). IR: (neat) 3296, 3060, 2950, 2816, 1740, 1623, 1446 cm<sup>-1</sup>; <sup>1</sup>H NMR (500 MHz, d-CD<sub>3</sub>OD)  $\delta$  7.48-7.54 (m, 5H), 5.14 (d,  $J = 7.0$  Hz, 1H), 4.76 (d,  $J = 7.0$  Hz, 1H), 3.79-3.84 (m, 2H), 3.65 (s, 3H), 3.05-3.09 (m, 2H), 2.09 (s, 3H). <sup>13</sup>C NMR (125 MHz, d-CD<sub>3</sub>OD)  $\delta$  174.3, 170.1, 131.9, 131.5, 130.6, 129.9, 68.9, 65.9, 64.2, 57.3, 56.0, 22.4. HRMS (ESI+) calcd. for C<sub>14</sub>H<sub>20</sub>N<sub>2</sub>O<sub>4</sub> [M-HCl+Na] 303.1321, found 303.1311.

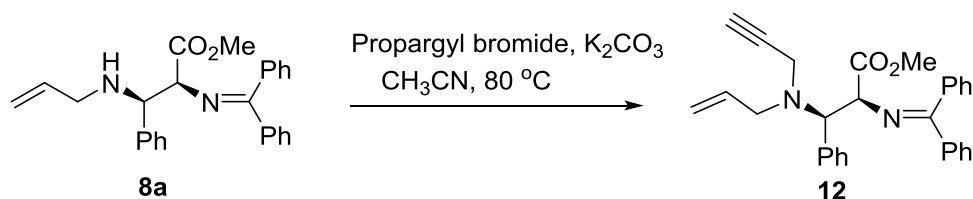

To a solution of allyl amine substrate **8a** (40 mg, 0.1 mmol) in CH<sub>3</sub>CN (0.5 ml) was added propargyl bromide (30 mg, 80% wt in toluene, 0.2 mmol) and K<sub>2</sub>CO<sub>3</sub> (70 mg, 0.5 mmol) at rt. The reaction mixture was stirred at 80 °C overnight. The reaction mixture was cooled to rt and quenched with water (5 ml). The reaction mixture was then extracted with ethyl acetate (5 ml) three times. The organic layers were dried with Na<sub>2</sub>SO<sub>4</sub>, and removed in vacuo and the residue was purified by flashing chromatography.

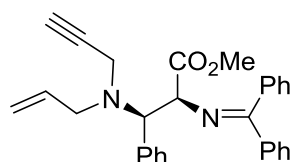

**Methyl (2S,3R)-3-(allyl(prop-2-yn-1-yl)amino)-2-((diphenylmethylene)amino)-3-phenylpropanoate (12)**

Colorless oil, 37 mg, 85% yield.  $\alpha_D^{25} = -63.1$  ( $c = 1.0$ , CHCl<sub>3</sub>). IR: (neat) 3296, 3060, 2950, 2816, 1740, 1623, 1446 cm<sup>-1</sup>; <sup>1</sup>H NMR (400 MHz, d-CDCl<sub>3</sub>)  $\delta$  7.67-7.69 (m, 2H),



7.33-7.41 (m, 6H), 7.19-7.24 (m, 5H), 6.96 (d,  $J = 5.6$  Hz, 2H), 5.74-5.84 (m, 1H), 5.21 (d,  $J = 17.2$  Hz, 1H), 5.13 (d,  $J = 8.4$  Hz, 1H), 4.65 (d,  $J = 6.4$  Hz, 1H), 4.57 (d,  $J = 6.8$  Hz, 1H), 3.55 (s, 3H), 3.51-3.54 (m, 1H), 3.35-3.39 (m, 1H), 2.98-3.07 (m, 2H), 2.12 (t,  $J = 2.4$  Hz, 1H).  $^{13}\text{C}$  NMR (100 MHz,  $\text{d-CDCl}_3$ )  $\delta$  171.4, 171.4, 140.0, 137.5, 136.6, 136.2, 130.5, 129.5, 129.3, 128.8, 128.5, 128.3, 128.2, 128.2, 127.7, 117.7, 80.6, 72.5, 68.9, 67.3, 53.7, 52.2, 39.9. HRMS (ESI+) calcd. for  $\text{C}_{29}\text{H}_{28}\text{N}_2\text{O}_2$   $[\text{M}+\text{H}]$  437.2224, found 437.2215.

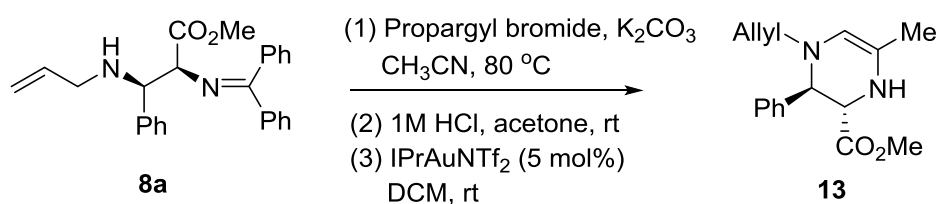

To a solution of **12** (33 mg, 0.08 mmol) in acetone (1 ml) was added HCl (1M, 0.4 mmol) dropwise at 0 °C. The reaction mixture was stirred at room temperature for 1 h. The acetone was removed in vacuo and the residue was washed with  $\text{Et}_2\text{O}$  (3 ml) twice. The residue was dried in vacuo to afford the product as a white solid. The free amine was obtained by dissolving the diamine salts in 1 N NaOH solution and extraction with DCM for three times.

To a solution of free amine (16 mg, 0.07 mmol) in DCM (0.3 ml) was added the IPrAuNTf<sub>2</sub> (3 mg, 0.0035 mmol) at rt. The reaction mixture was stirred at rt for 6h. The solvent was removed under vacuum and the residue was purified by flashing chromatography.

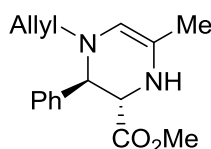

### Methyl

#### (2S,3R)-4-allyl-6-methyl-3-phenyl-1,2,3,4-tetrahydropyrazine-2-carboxylate (**13**)

Colorless oil, 14 mg, 56% yield over three steps.  $\alpha_D^{25} = +33$  ( $c = 1.0$ ,  $\text{CHCl}_3$ ). IR: (neat) 2921, 2852, 1745, 1674, 1643  $\text{cm}^{-1}$ ;  $^1\text{H}$  NMR (300 MHz,  $\text{d-CDCl}_3$ )  $\delta$  7.36-7.41 (m, 3H), 7.16 (dd,  $J = 7.2, 1.5$  Hz, 2H), 5.65-5.78 (m, 1H), 5.23 (d,  $J = 10.2$  Hz, 1H), 5.14 (d,  $J =$



17.1 Hz, 1H), 5.01 (d,  $J = 2.1$  Hz, 1H), 4.85 (d,  $J = 1.5$  Hz, 1H), 4.72-4.79 (m, 1H), 3.80 (s, 3H), 3.22 (d,  $J = 8.1$  Hz, 1H), 3.17 (d,  $J = 6.9$  Hz, 1H), 2.40 (d,  $J = 0.9$  Hz, 3H).  $^{13}\text{C}$  NMR (125 MHz,  $\text{d-CDCl}_3$ )  $\delta$  169.7, 166.5, 156.7, 137.2, 131.8, 129.4, 128.7, 126.6, 119.5, 65.7, 59.2, 53.3, 47.5, 21.8. HRMS (ESI+) calcd. for  $\text{C}_{16}\text{H}_{20}\text{N}_2\text{O}_2$   $[\text{M}+\text{H}]$  273.1525, found 273.1530.

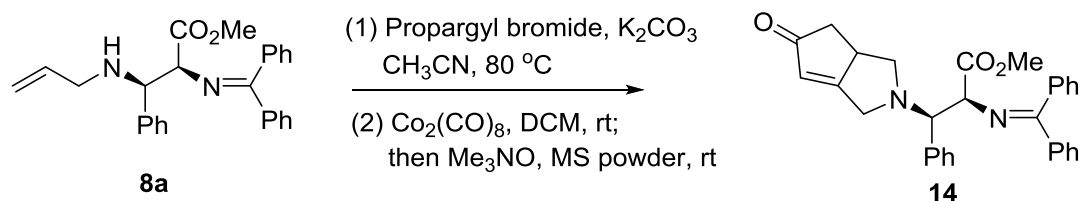

To a solution of **12** (33 mg, 0.08 mmol) in DCM (1 ml) was added  $\text{Co}_2(\text{CO})_8$  (28 mg, 0.08 mmol) at rt. The reaction mixture was stirred at room temperature for 2 h. The starting material was consumed as checked by TLC. To the reaction mixture was added the MS powder (4 Å, 50 mg), followed by  $\text{Me}_3\text{NO}$  (37 mg, 0.5 mmol) at rt. The reaction mixture was vigorously stirred for 6h. The mixture was filtered through a small pad of Celite and washed with DCM (10 ml). The solvent was removed under vacuum and the residue was purified by flashing chromatography.

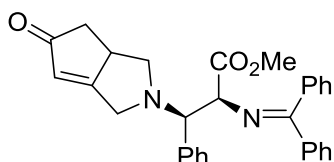

**Methyl (2S,3R)-2-((diphenylmethylene)amino)-3-(5-oxo-3,3a,4,5-tetrahydrocyclopenta[c]pyrrol-2(1H)-yl)-3-phenylpropanoate (**14**)**

Colorless oil, 30 mg, 65% yield over two steps.  $\alpha_{\text{D}}^{25} = -72.1$  ( $c = 1.0$ ,  $\text{CHCl}_3$ ). IR: (neat) 2920, 1738, 1709, 1627, 1236  $\text{cm}^{-1}$ ; dr = 1:1,  $^1\text{H}$  NMR (500 MHz,  $\text{d-CDCl}_3$ )  $\delta$  7.87-7.89 (m, 4H), 7.61-7.65 (m, 5H), 7.56-7.59 (m, 5H), 7.51-7.54 (m, 2H), 7.46-7.48 (m, 8H), 7.40-7.42 (m, 2H), 7.21-7.22 (m, 2H), 6.99-7.01 (m, 2H), 6.07 (s, 1H), 6.02 (s, 1H), 4.82 (d,  $J = 6.5$  Hz, 1H), 4.68 (s, 2H), 4.65 (d,  $J = 7.0$  Hz, 1H), 4.35 (d,  $J = 12.5$  Hz, 1H), 3.90-3.95 (m, 2H), 3.81 (s, 3H), 3.73 (s, 3H), 3.65 (d,  $J = 12.5$  Hz, 1H), 3.46-3.50 (m, 1H), 3.33-3.37 (m, 1H), 3.28-3.30 (m, 1H), 3.25-3.26 (m, 1H), 2.76-2.81 (m, 1H),



2.67-2.72 (m, 1H), 2.42-2.45 (m, 1H), 2.26-2.32 (m, 1H), 2.16-2.20 (m, 1H), 2.07-2.11 (m, 1H).  $^{13}\text{C}$  NMR (125 MHz,  $\text{d-CDCl}_3$ )  $\delta$  210.0, 209.9, 186.9, 186.8, 171.8, 171.6, 171.5, 171.3, 139.8, 138.6, 137.6, 136.1, 136.1, 130.8, 130.7, 130.3, 129.3, 129.2, 129.2, 129.0, 128.9, 128.8, 128.6, 128.5, 128.5, 128.4, 128.4, 128.3, 128.1, 128.0, 127.9, 124.3, 124.2, 70.4, 70.0, 69.9, 69.8, 56.1, 55.2, 52.4, 52.2, 51.9, 51.5, 46.0, 45.6, 40.5, 40.3. HRMS (ESI+) calcd. for  $\text{C}_{30}\text{H}_{28}\text{N}_2\text{O}_3$   $[\text{M}+\text{H}]$  465.2173, found 465, 2164.

### VIII. References:

1. (a) Trost, B. M.; Mahapatra, S.; Hansen, M. *Angew. Chem. Int. Ed.* **2015**, *54*, 6032 and references cited in. (b) Ickes, A. R.; Ensign, S. C.; Gupta, A. K.; Hull, K. L. *J. Am. Chem. Soc.* **2014**, *136*, 11256. (c) Coulthard, G.; Unsworth, W. P.; Taylor, R. J. K. *Tetrahedron Lett.* **2015**, 3113. (d) Georg, G. I.; Kant, J.; He, P.; Ly, A. M.; Lampe, L. *Tetrahedron Lett.* **1988**, 2409.
2. (a) O'Donnell, M. J.; Polt, R. L. *J. Org. Chem.*, **1982**, *47*, 2663. (b) Danner, P.; Bauer, M.; Phukan, P.; Maier, M. E. *Eur. J. Org. Chem.* **2005**, 317.
3. (a) Dang, T. P.; Kagan, H. B. *Chem. Commun.*, **1971**, 481. (b) Kagan, H. B.; Dang, T. P. *J. Am. Chem. Soc.* **1972**, *94*, 6429. (c) Koschker, P.; Kahny, M.; Breit, B. *J. Am. Chem. Soc.* **2015**, *137*, 3131.
4. (a) Viso, A.; Fernández de la Pradilla, R.; López-Rodríguez, M. L.; García, A.; Flores, A.; Alonso, M. *J. Org. Chem.* **2004**, *69*, 1542. (b) Cremonesi, G.; Dalla Croce, P.; Gallanti, M.; La Rosa, C. *Tetrahedron* **2014**, *70*, 2054.
5. Arai, T.; Mishiro, A.; Matsumura, E.; Awata, A.; Shirasugi, M. *Chem. Eur. J.* **2012**, *18*, 11219.



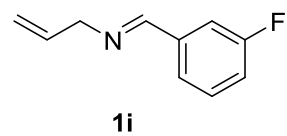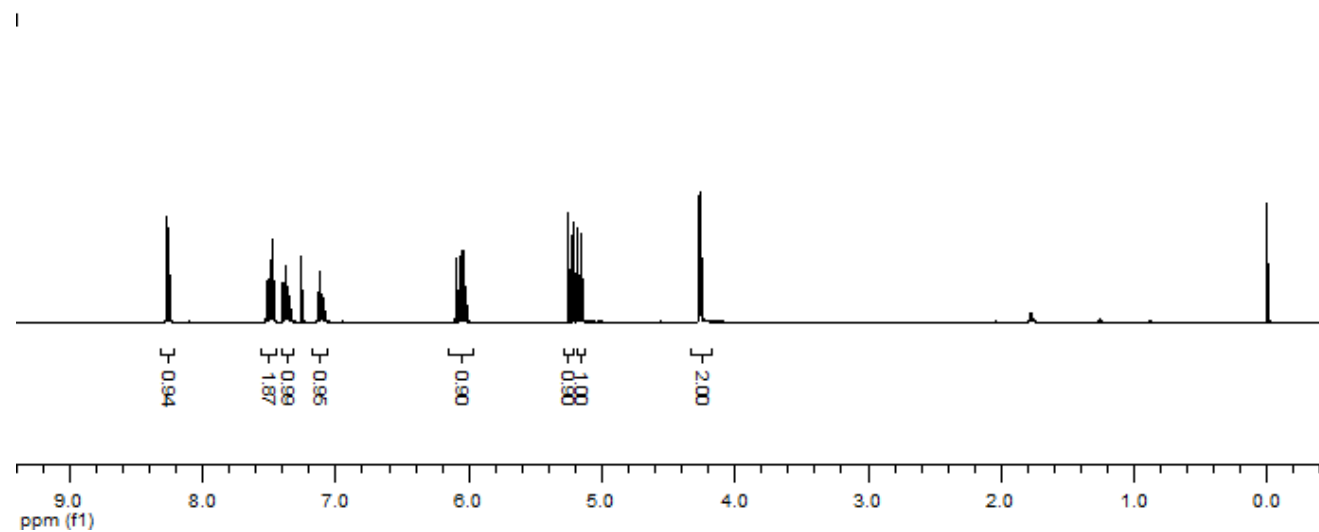



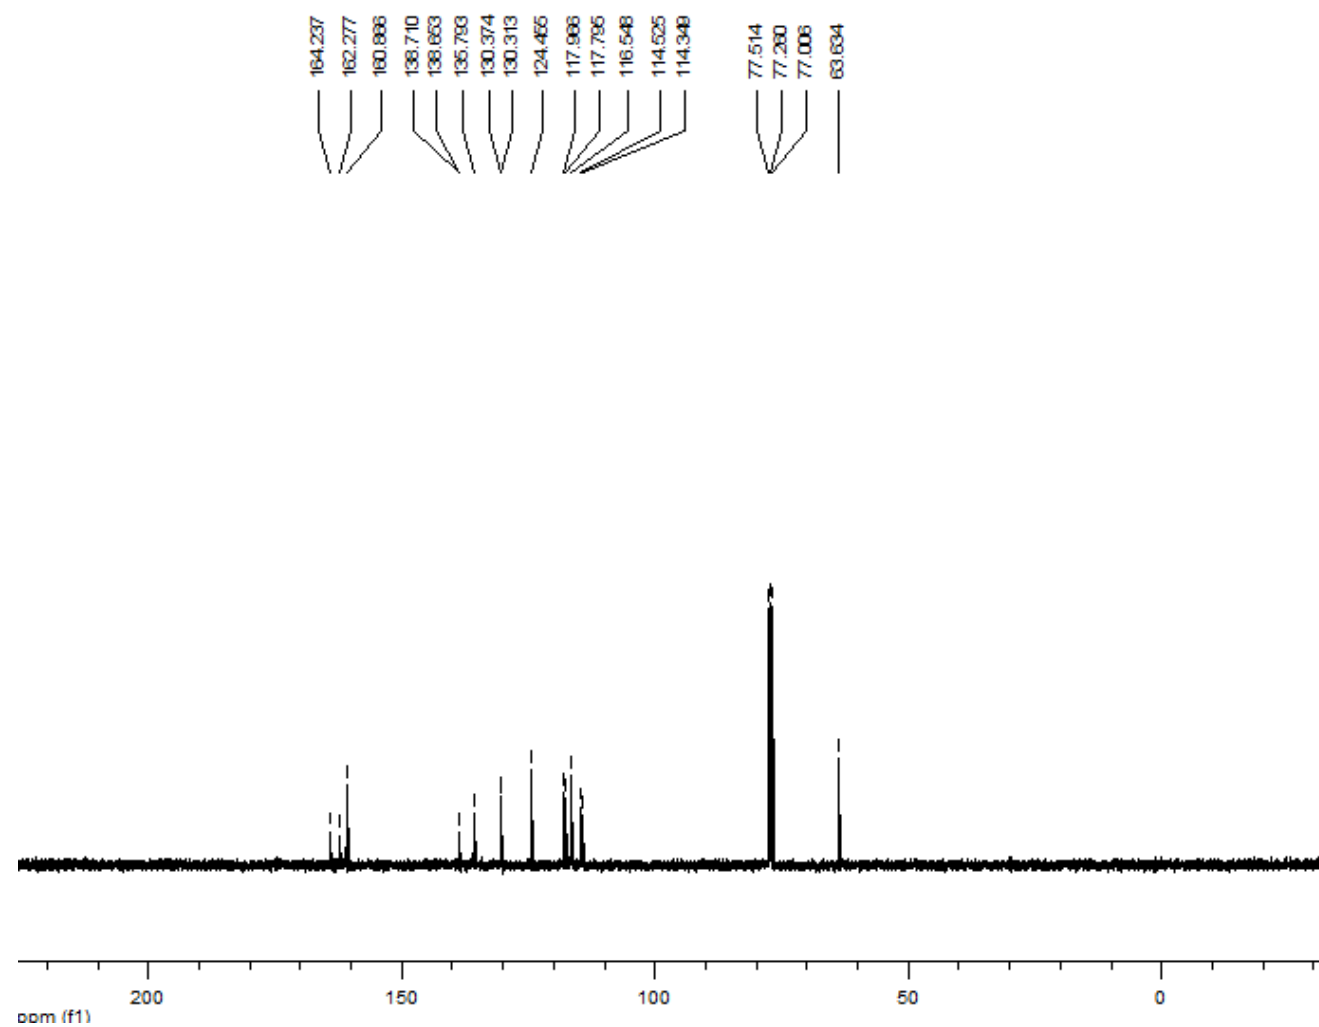



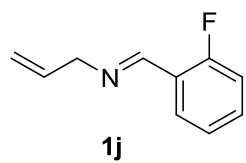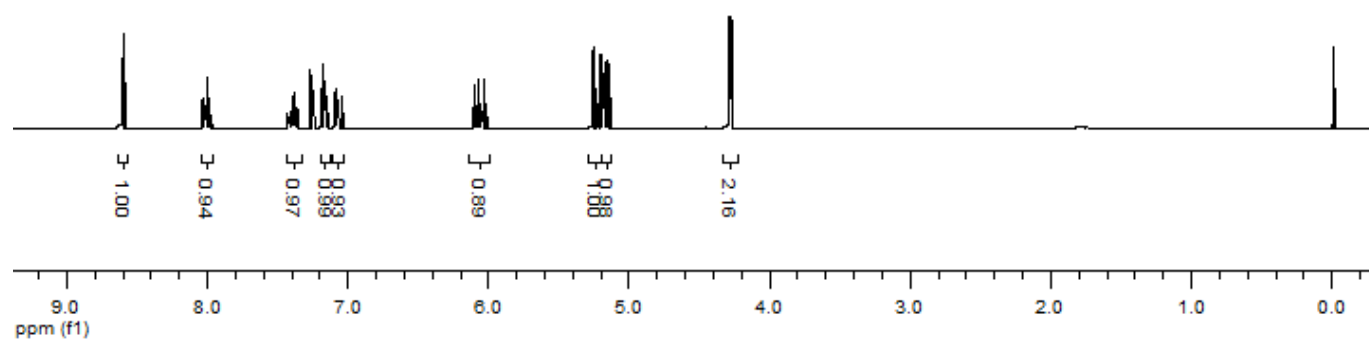



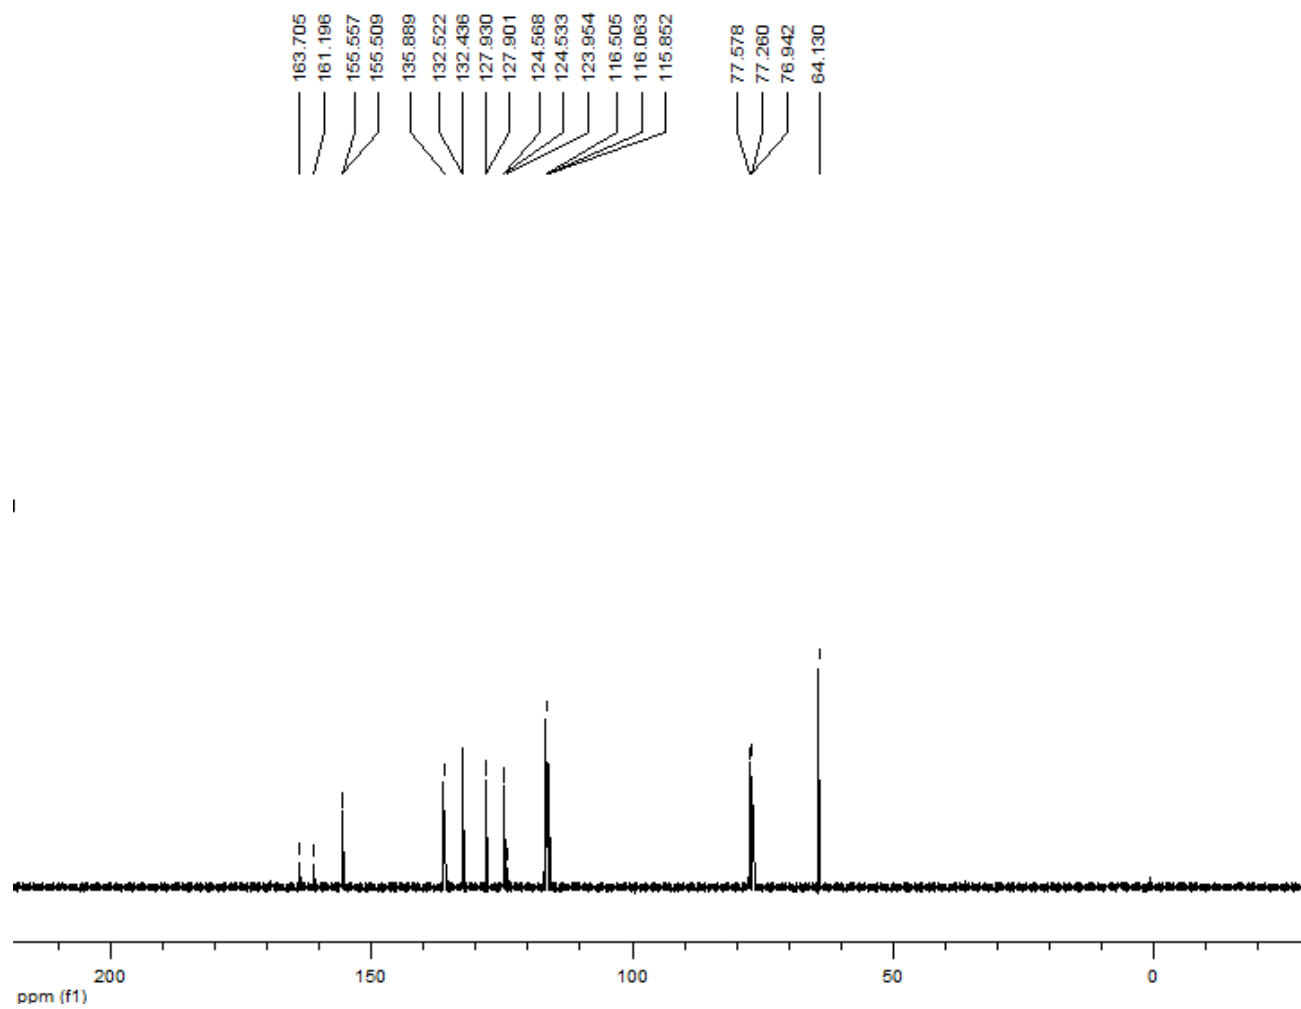



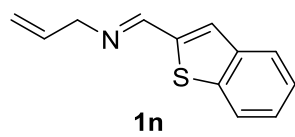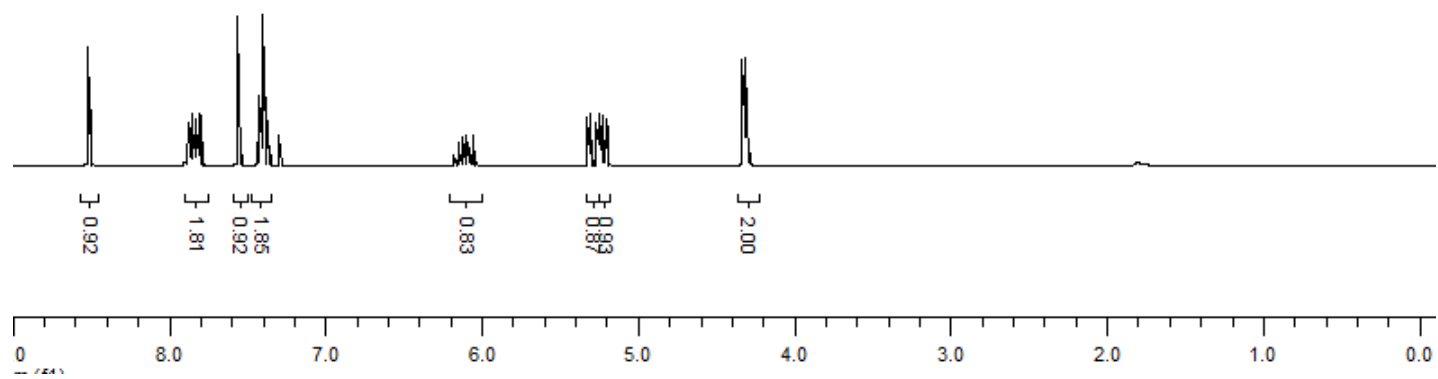



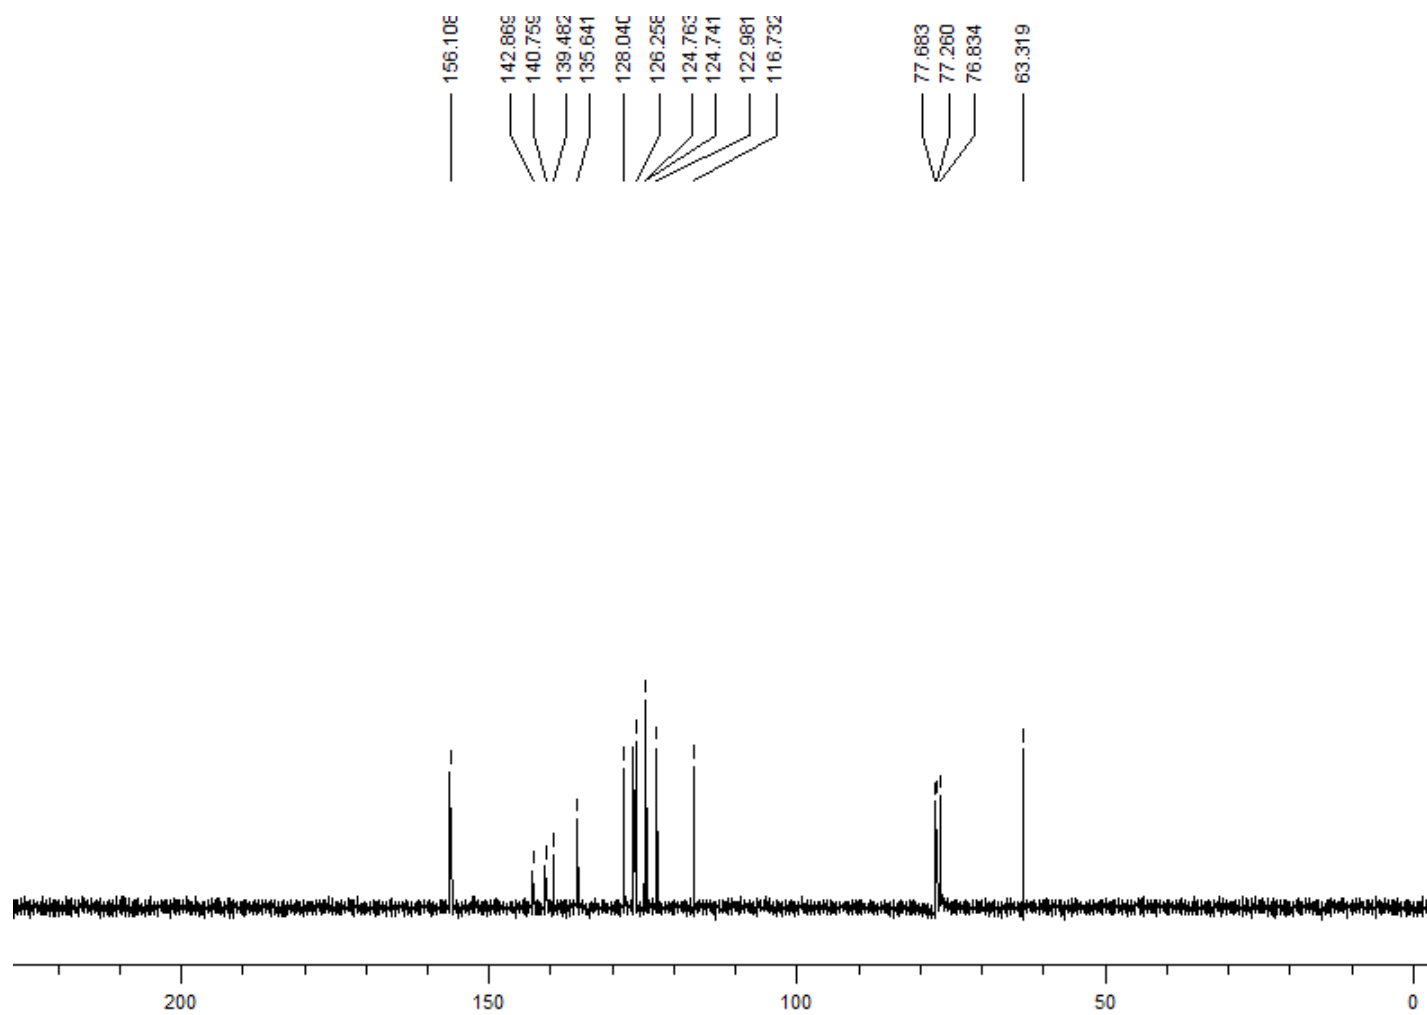



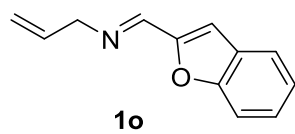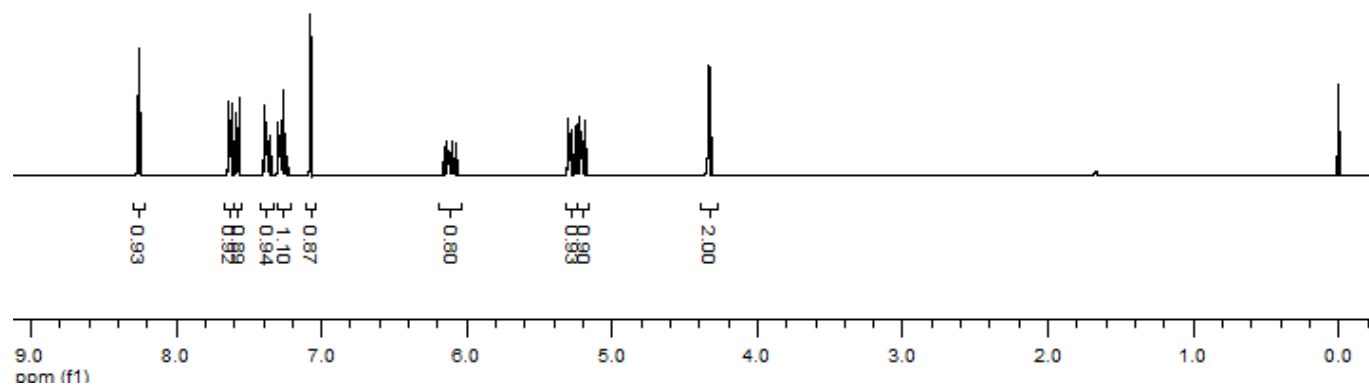



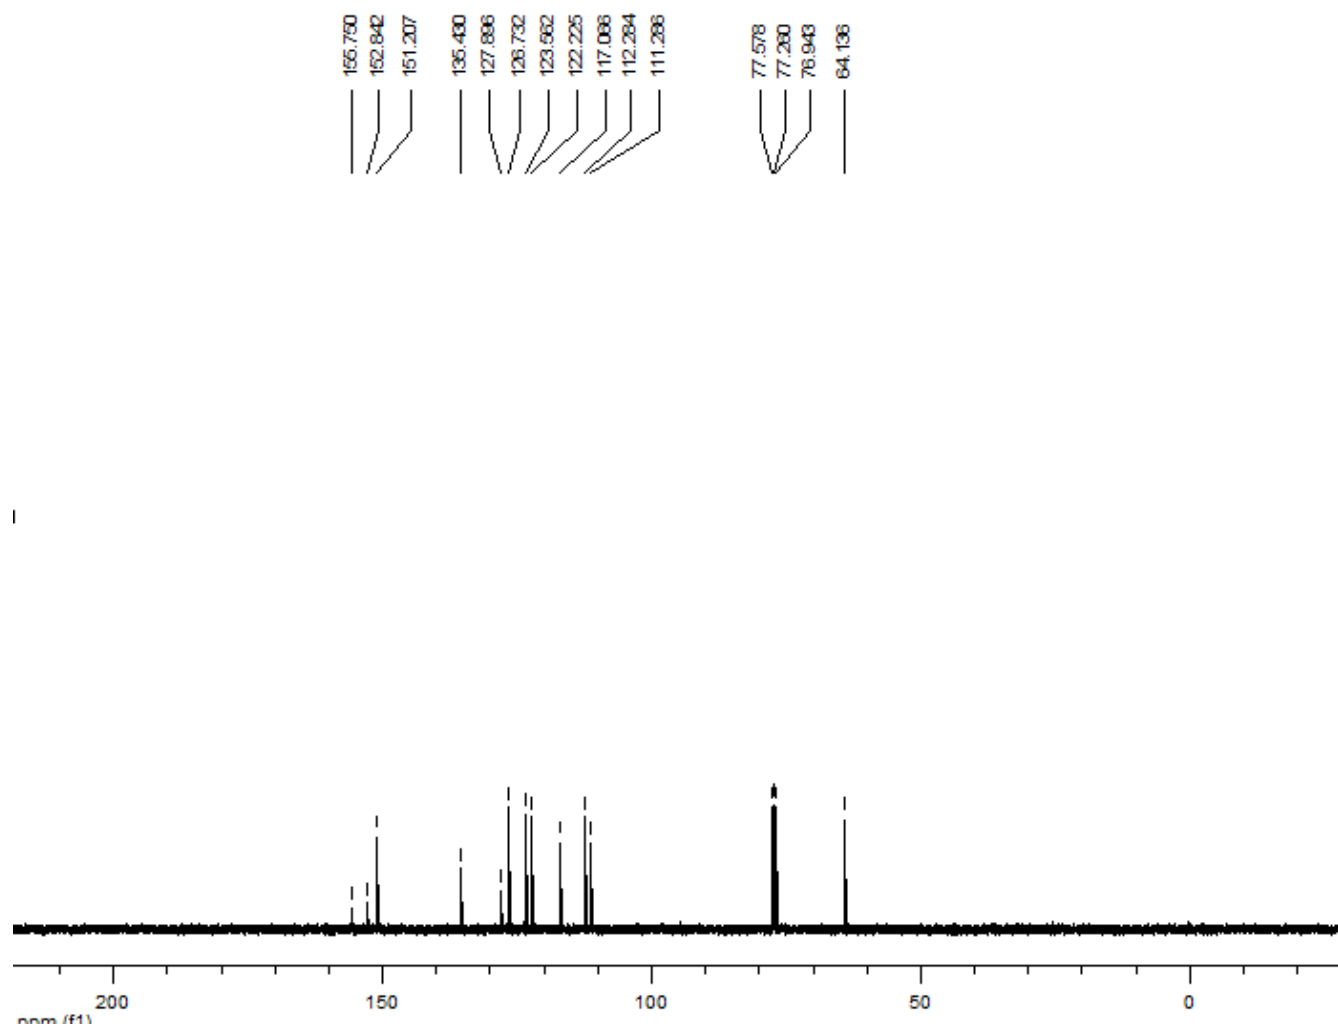



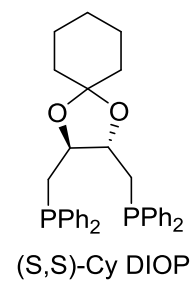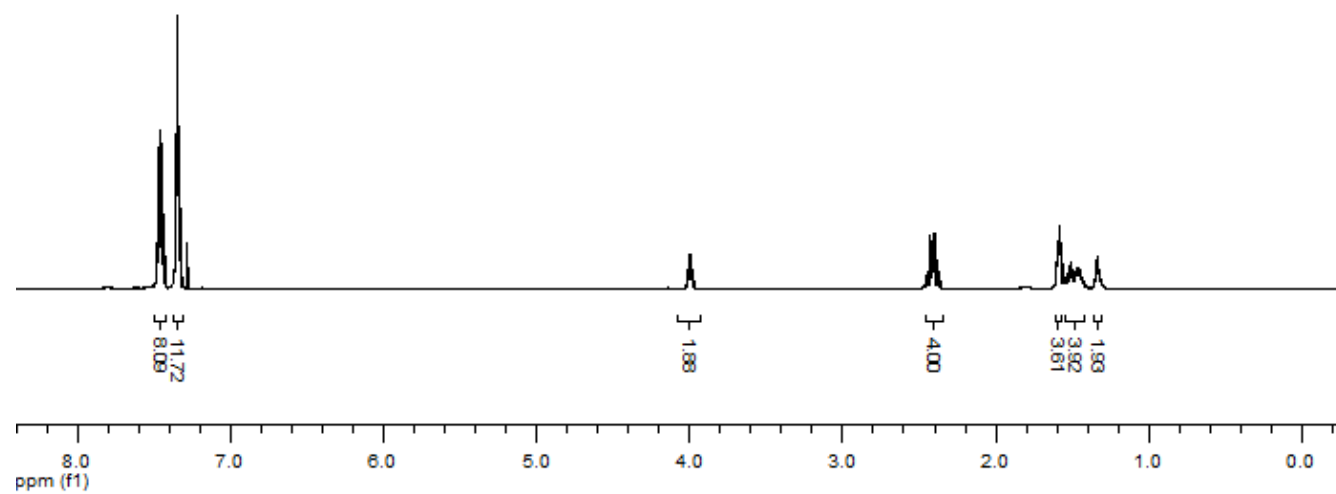



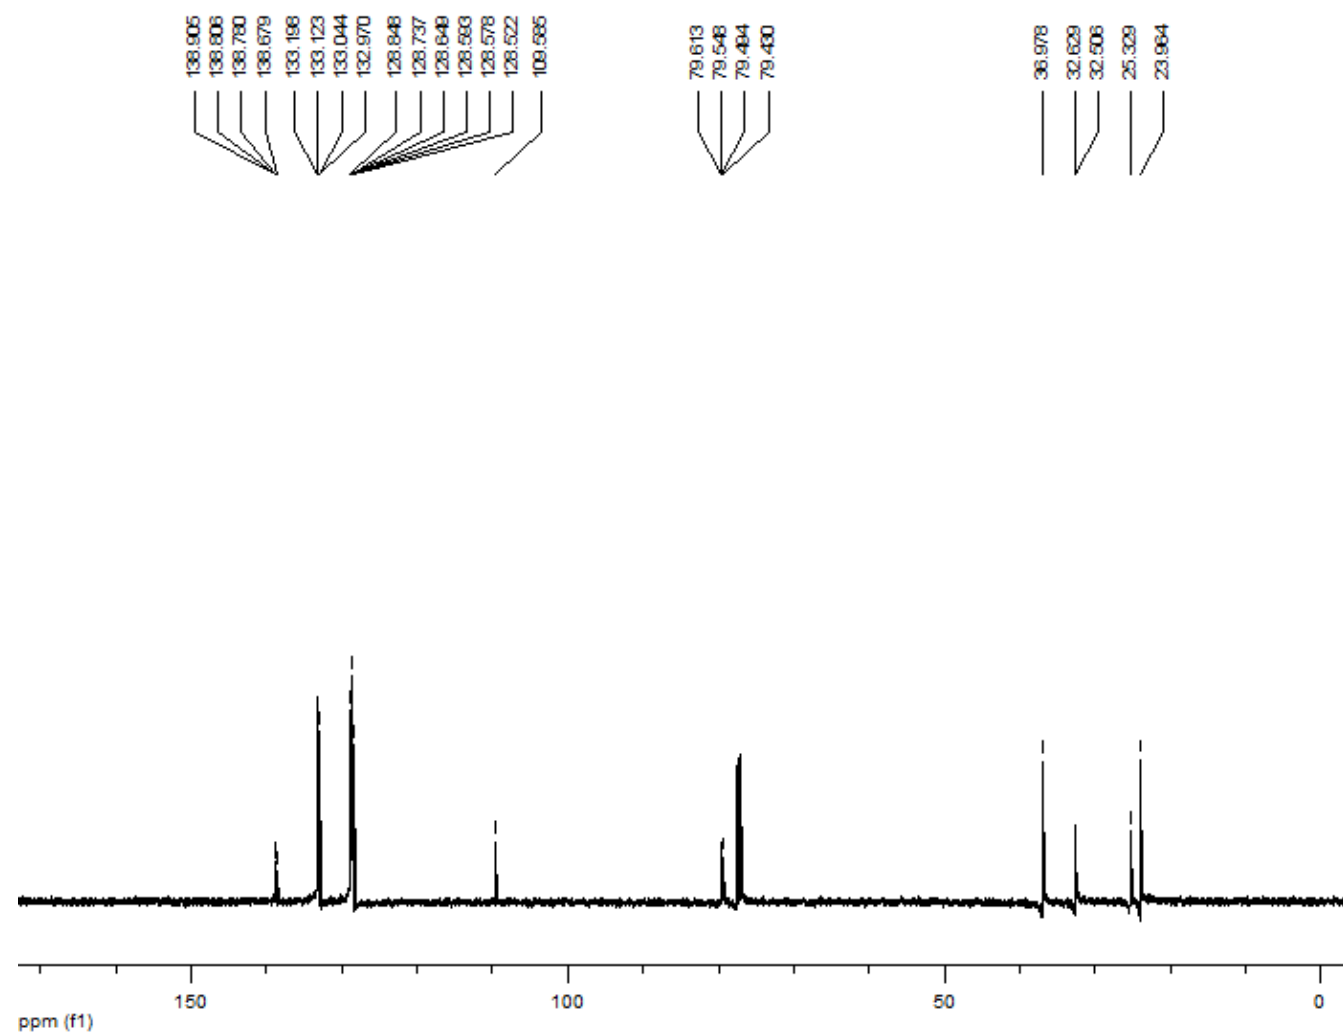



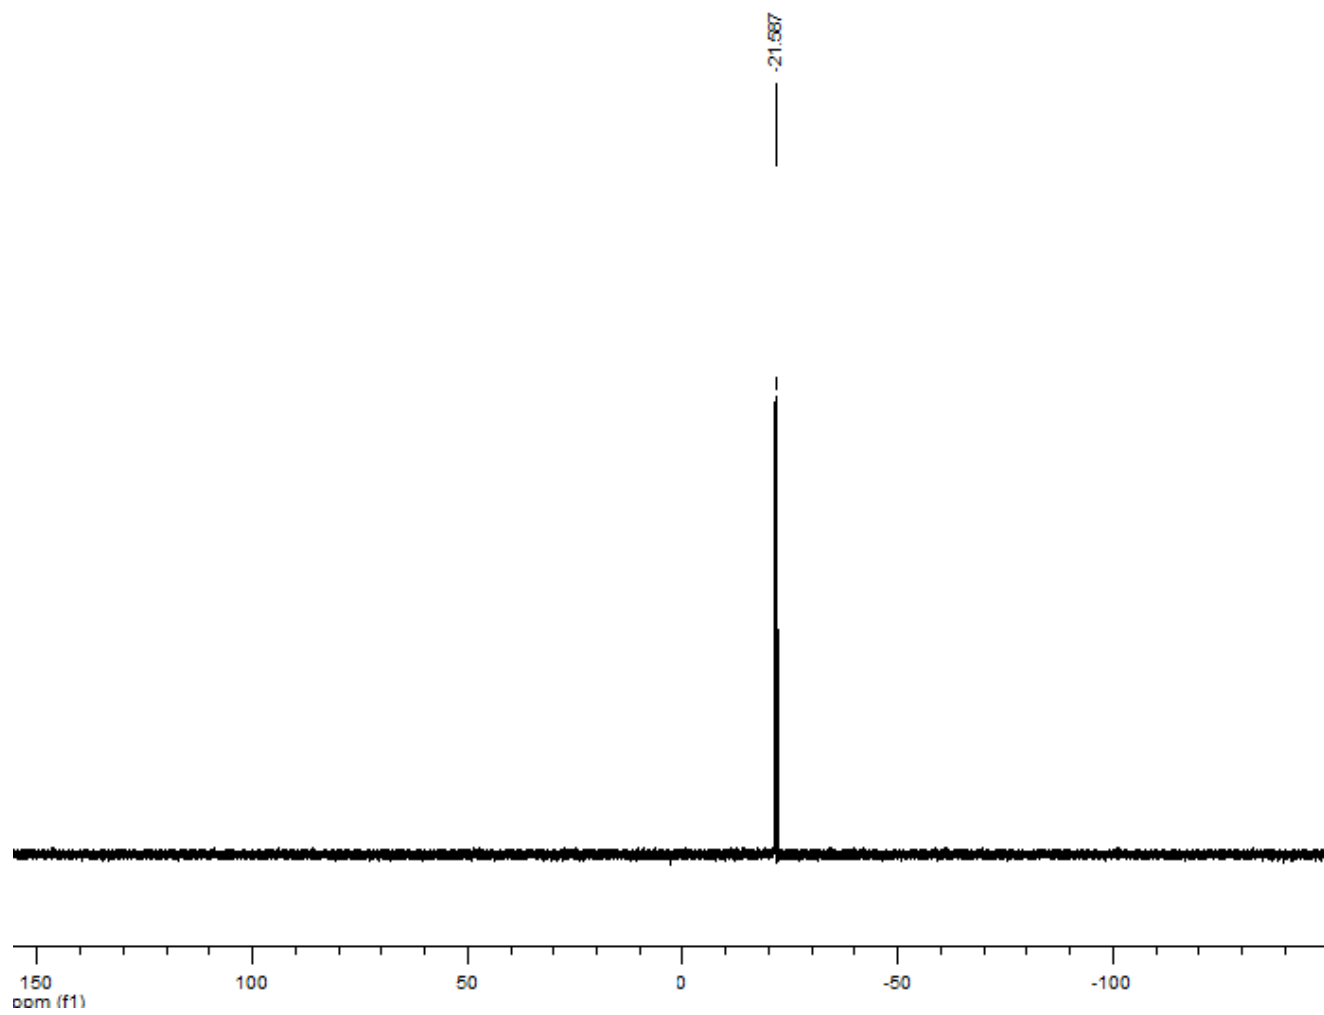



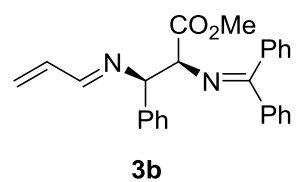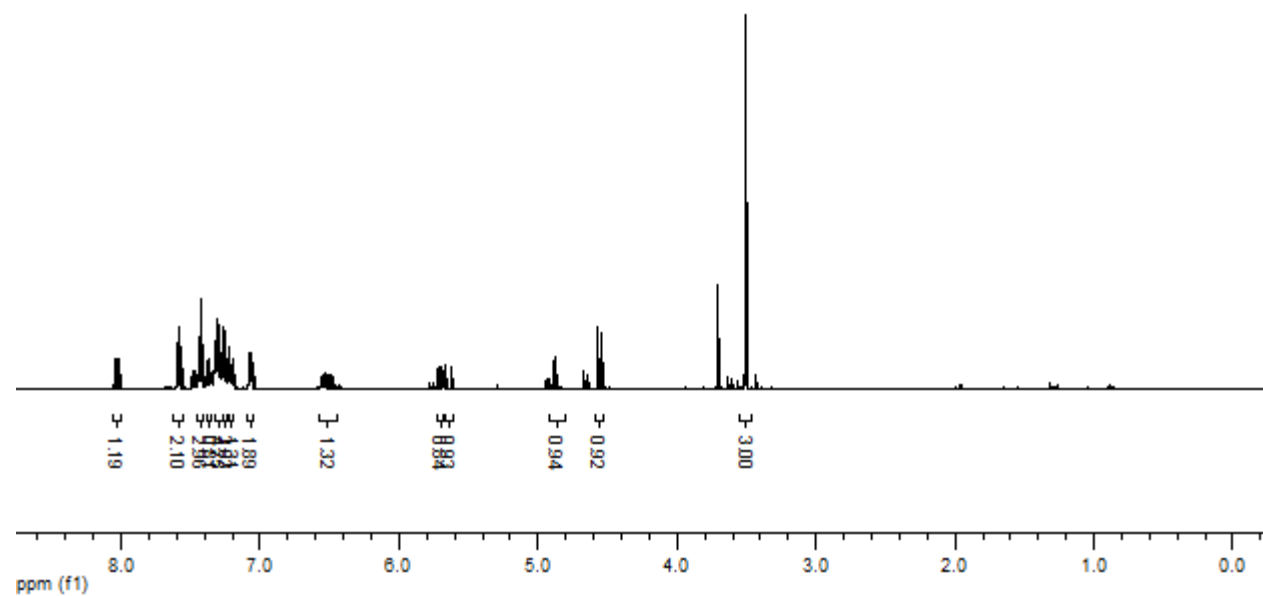



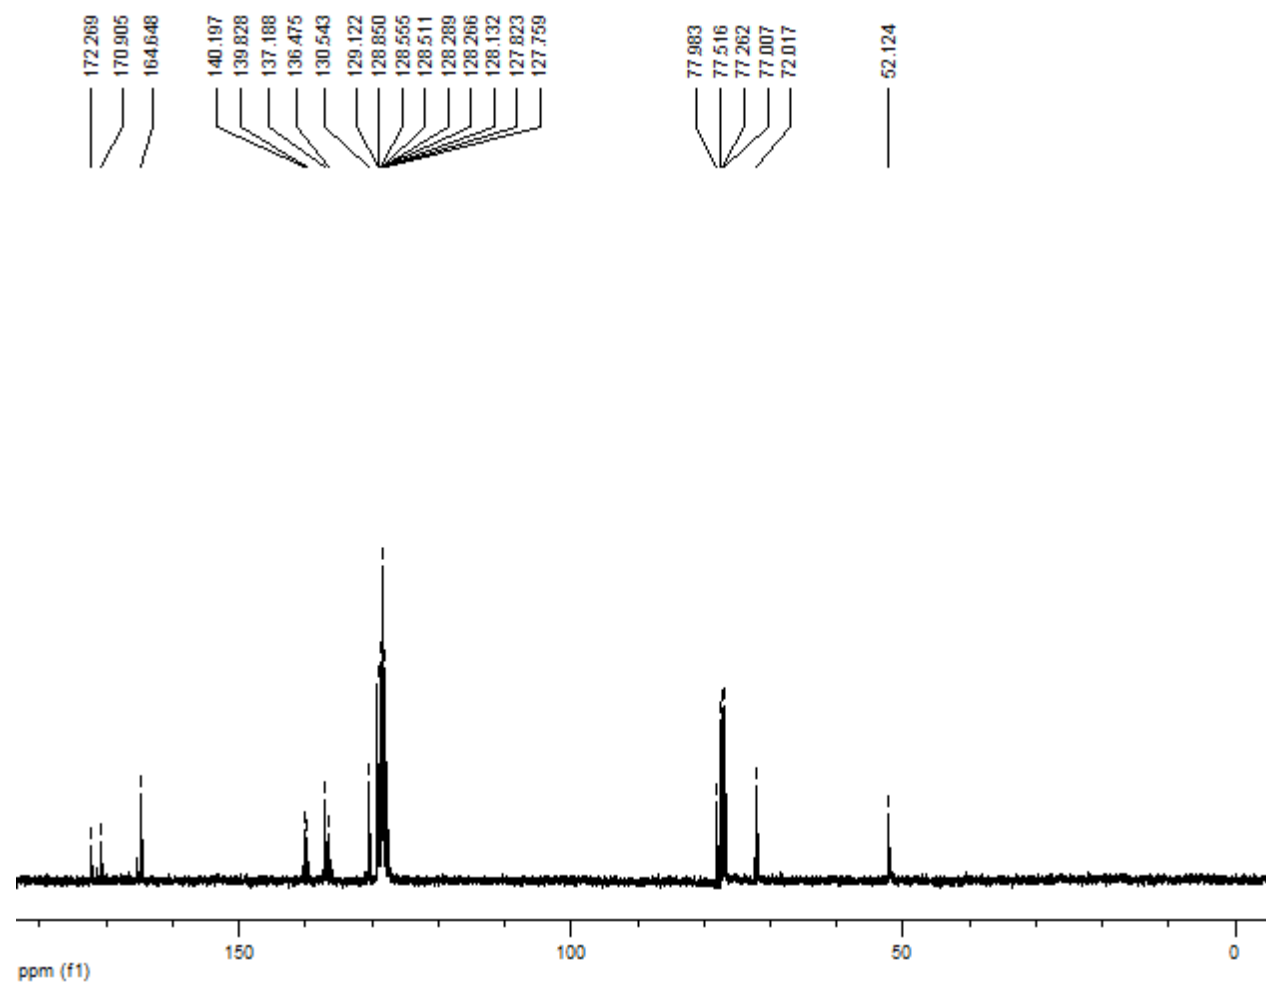



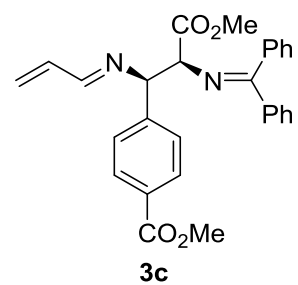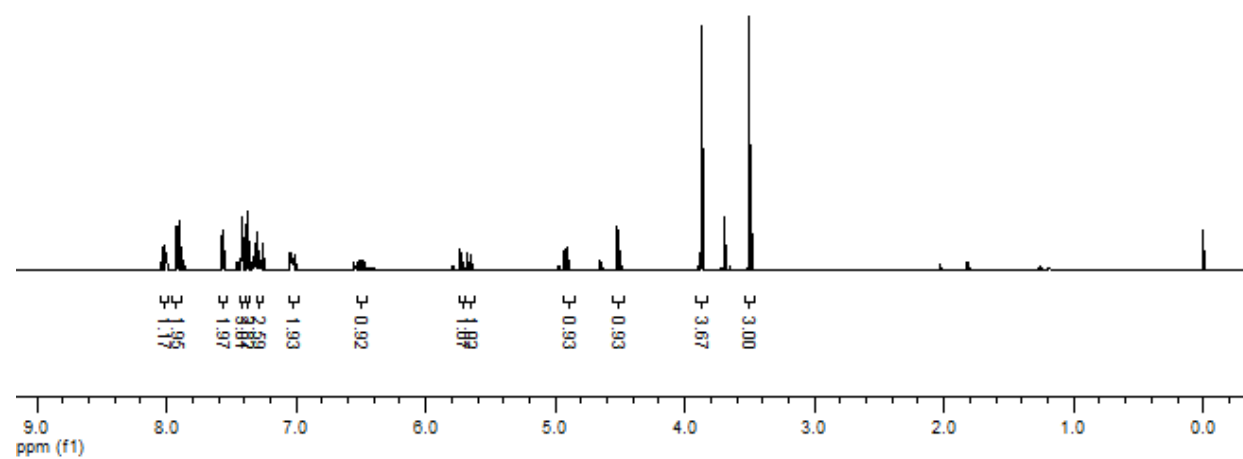



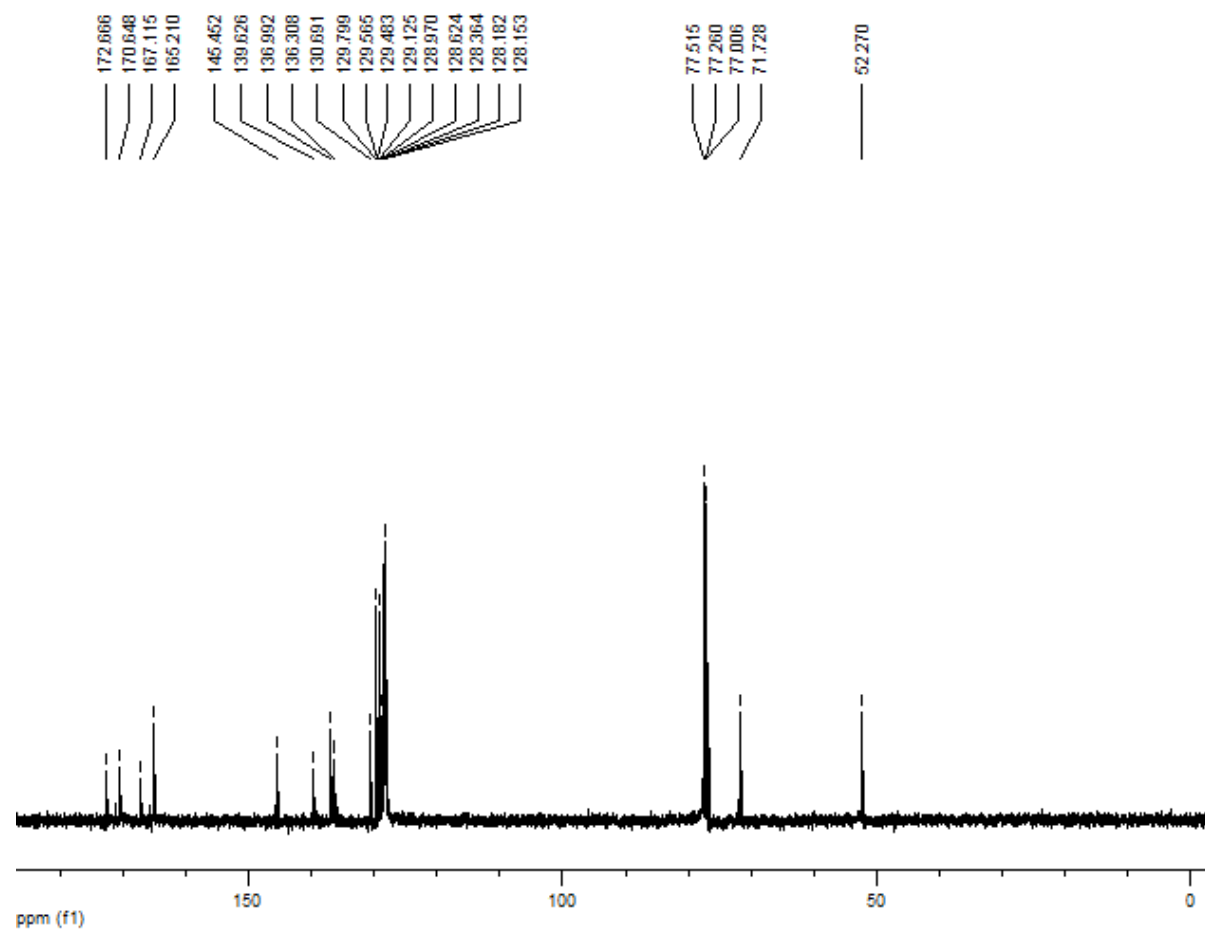



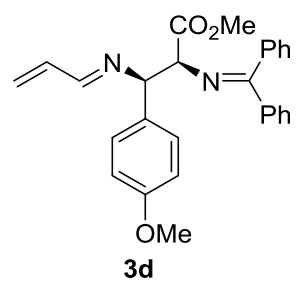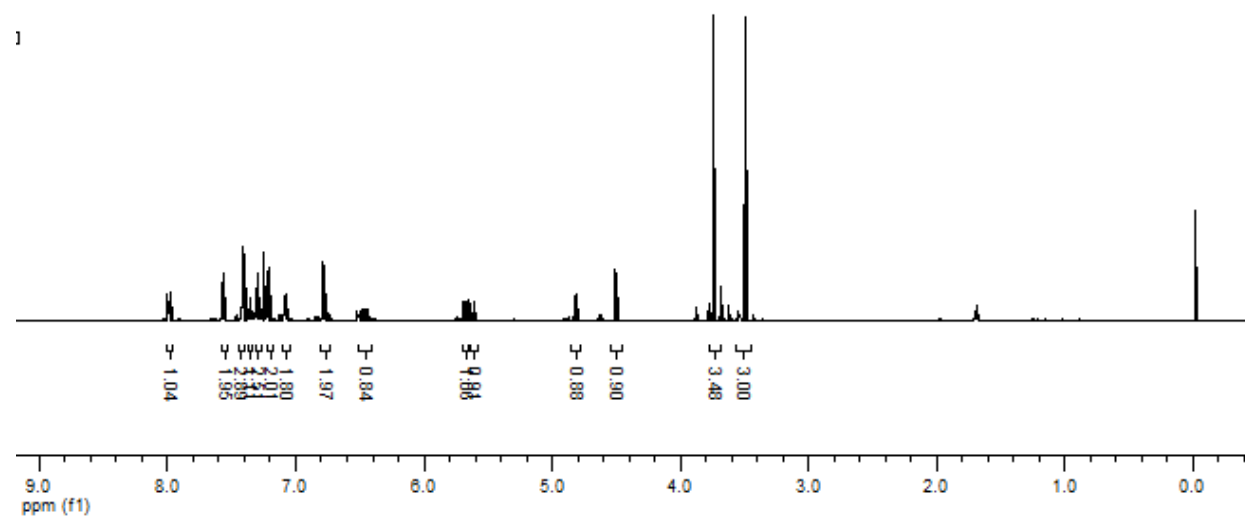



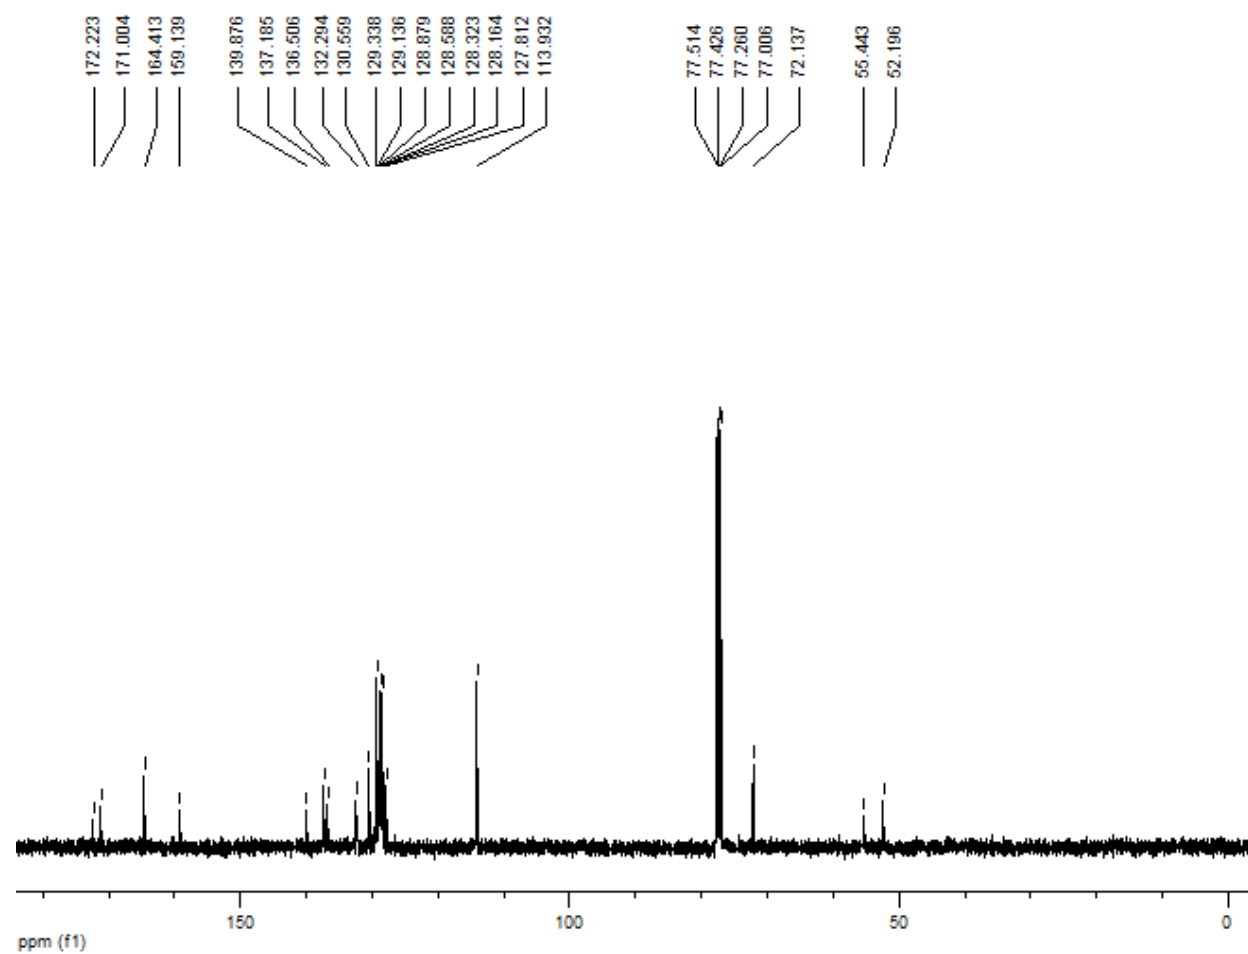



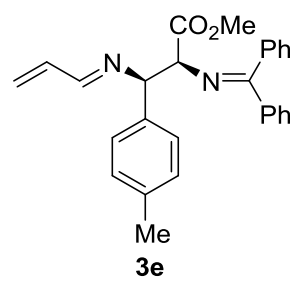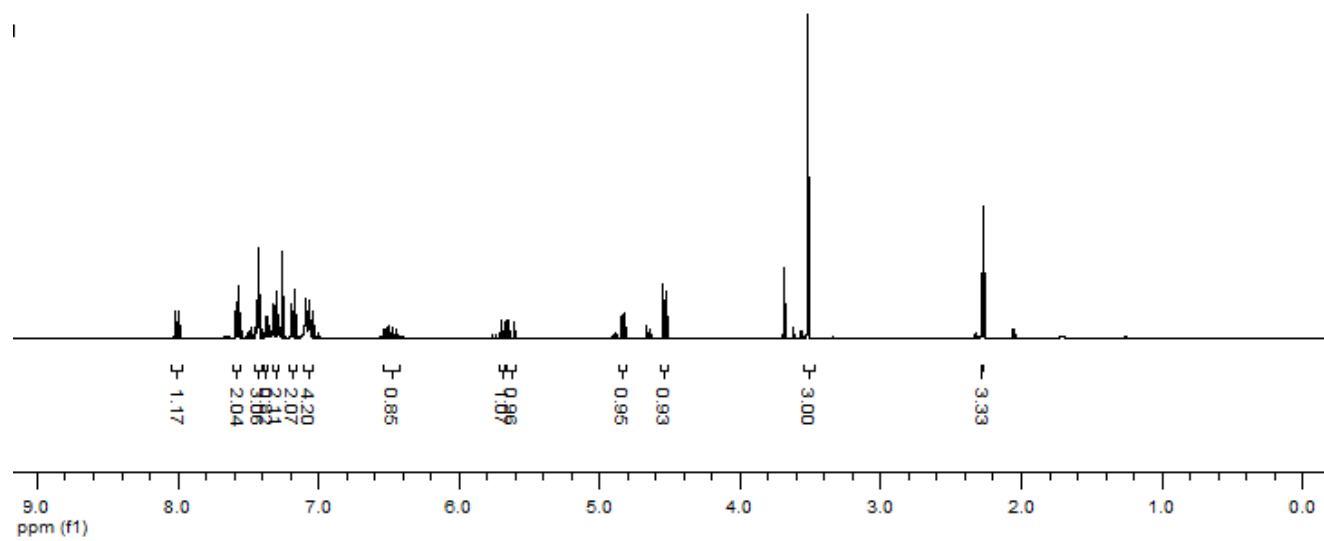



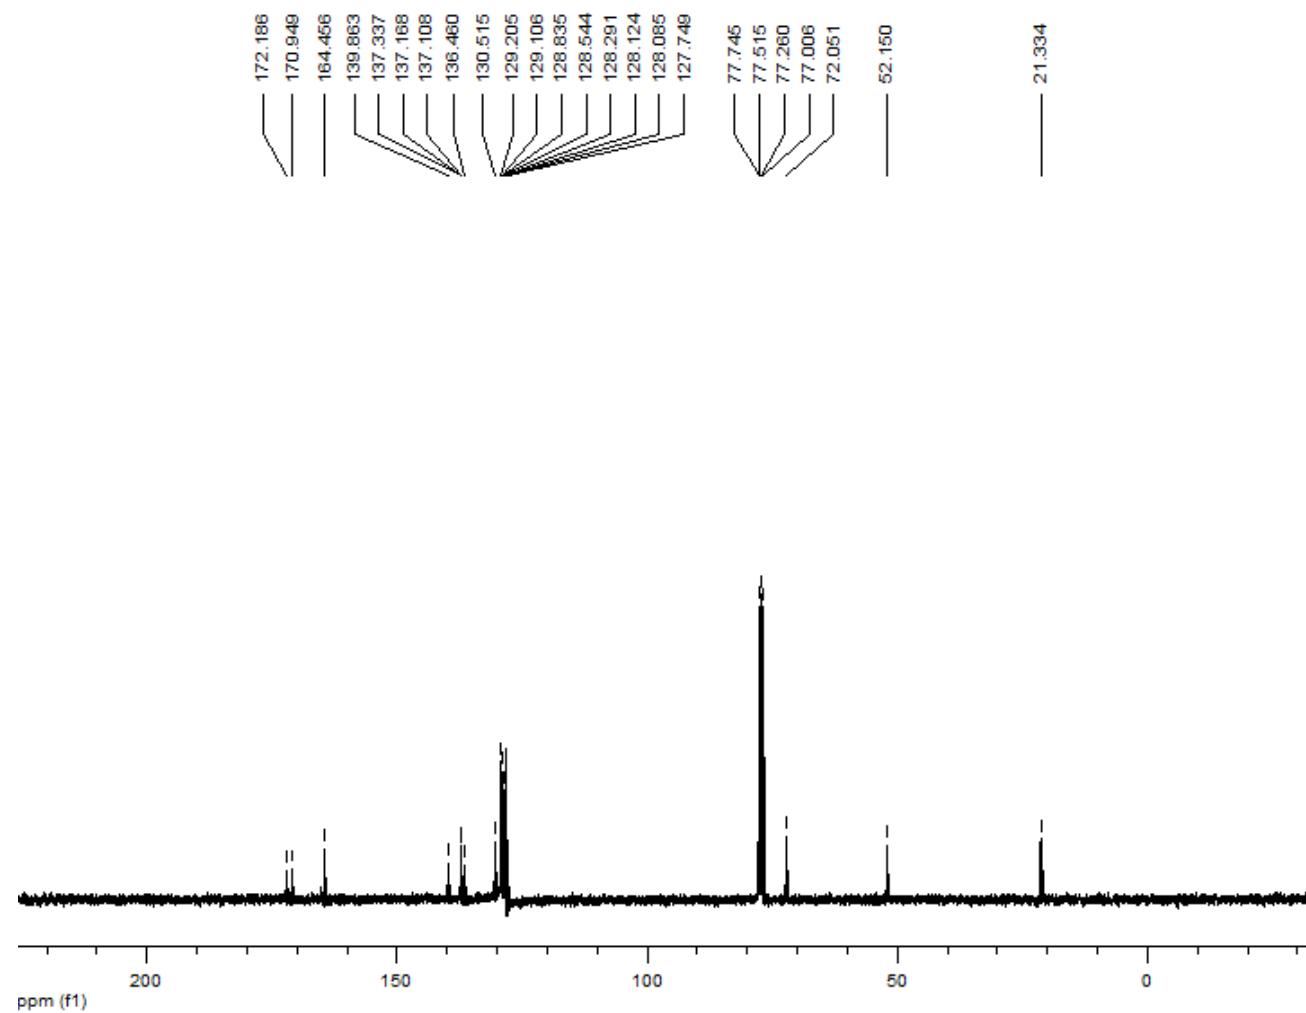



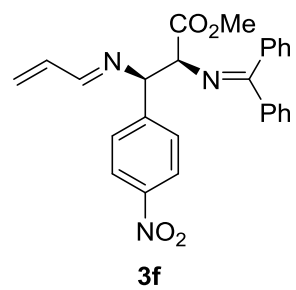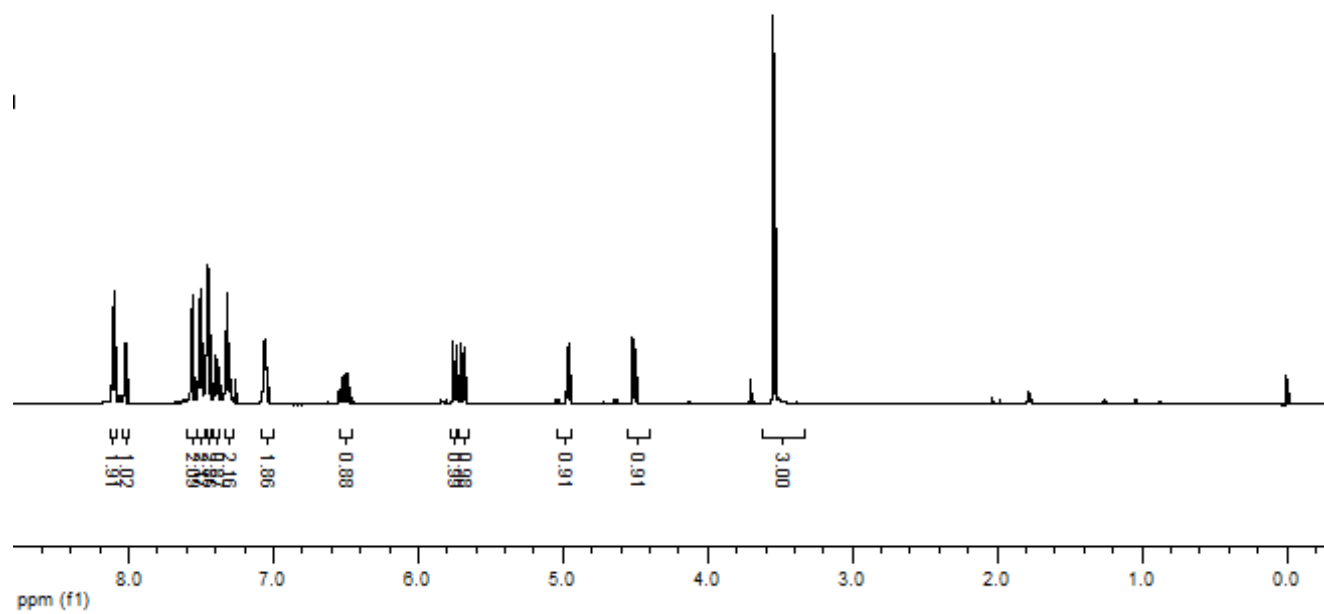



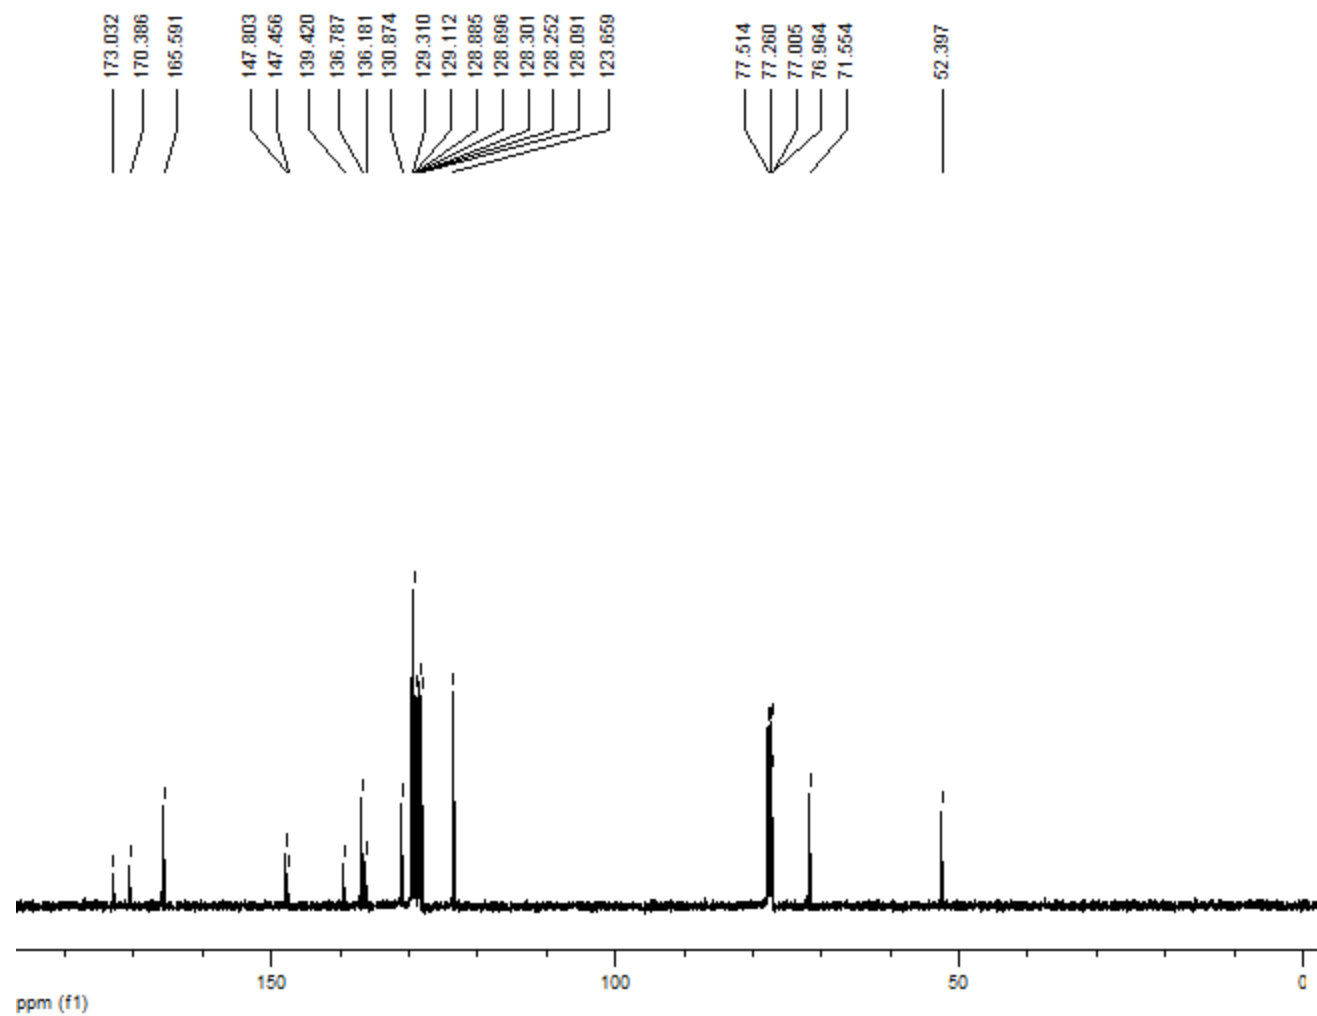



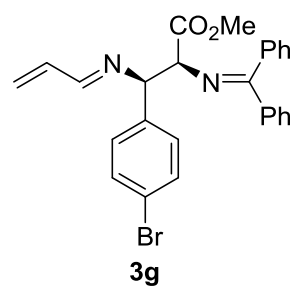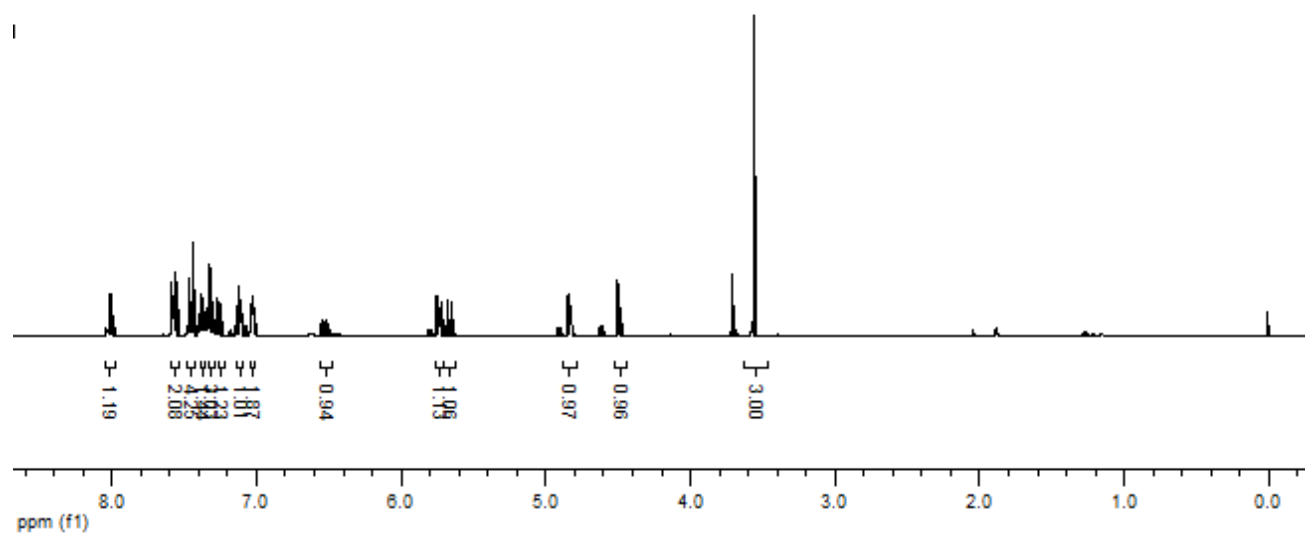



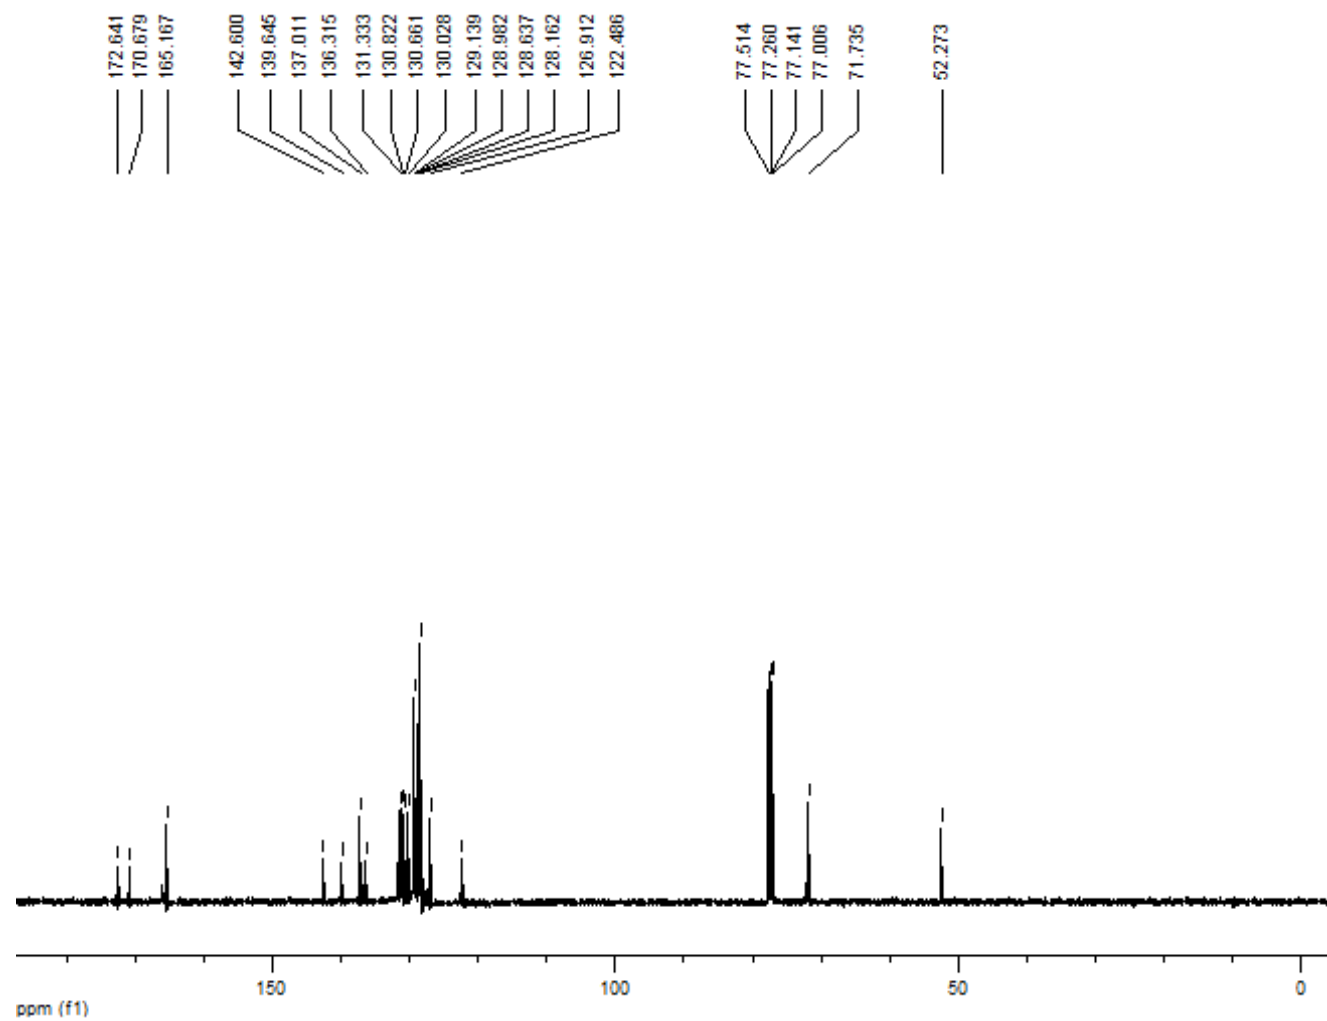



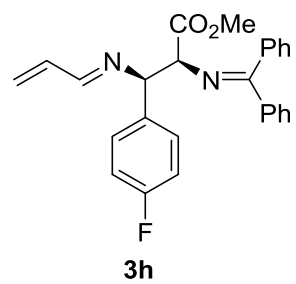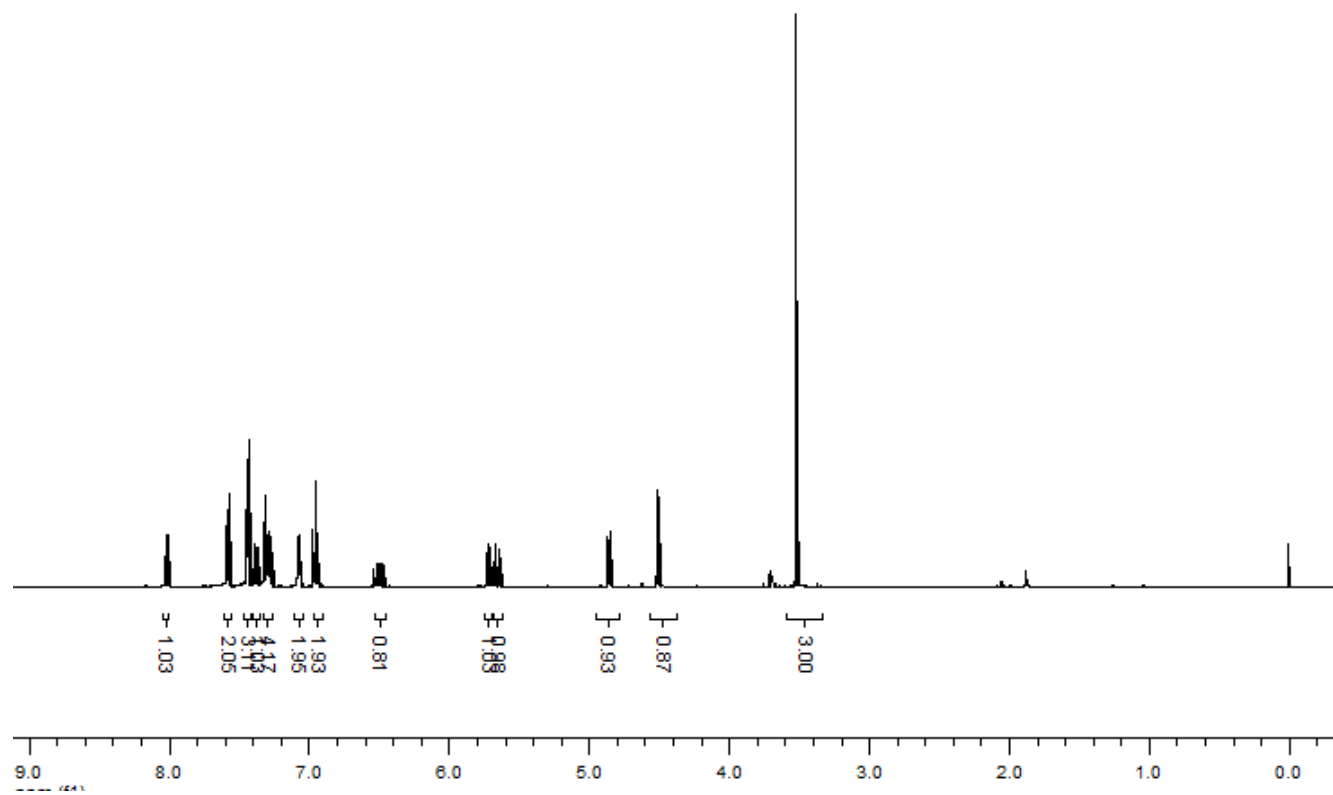



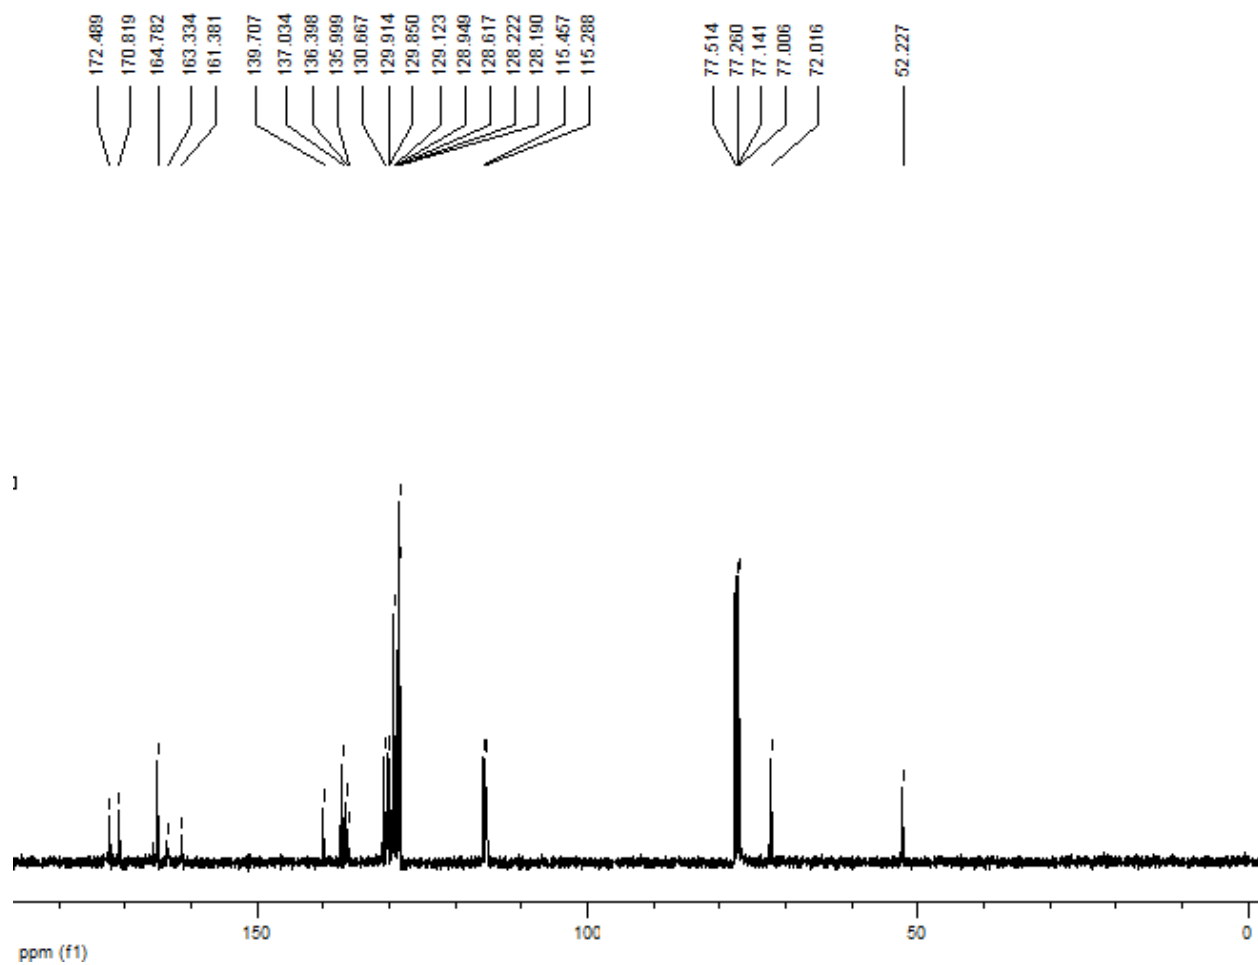



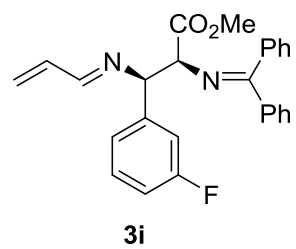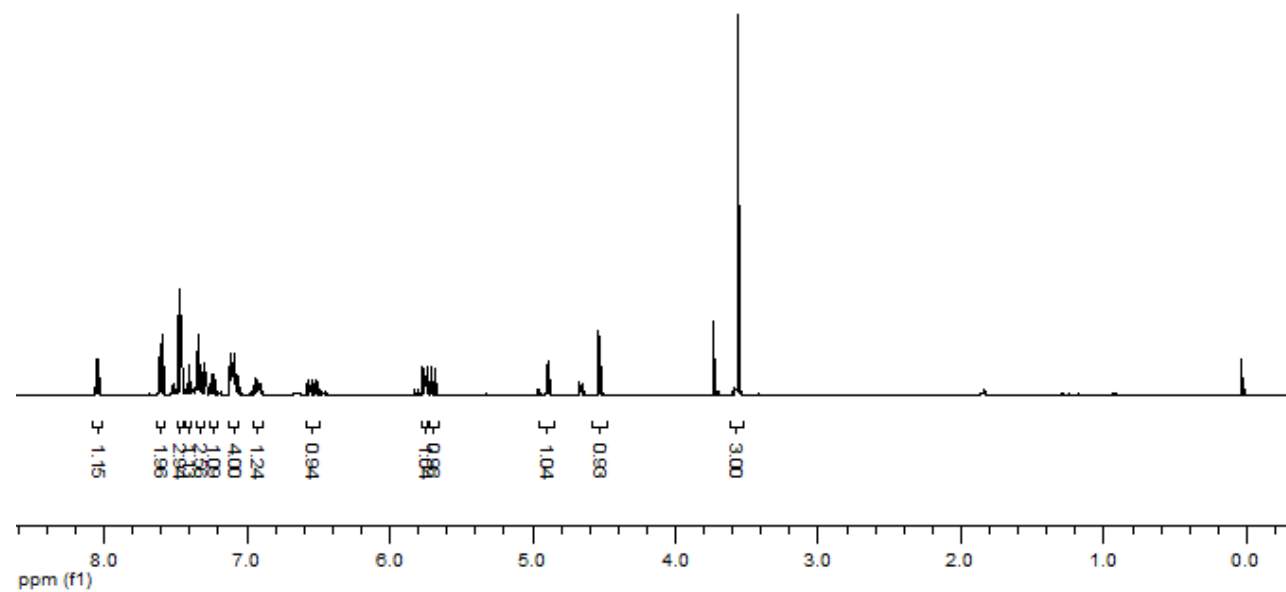



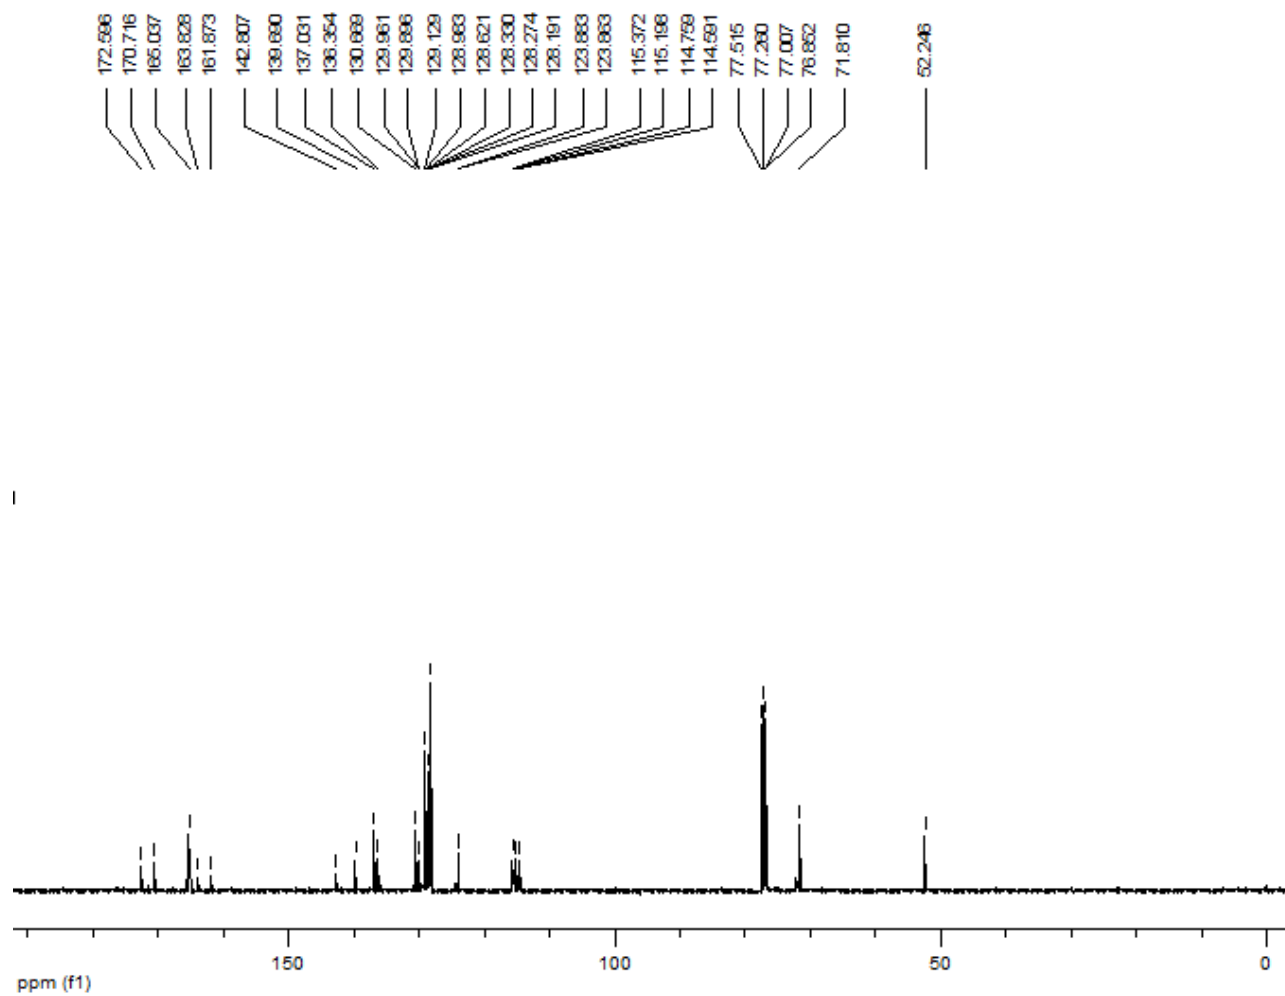



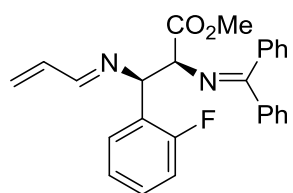

3j

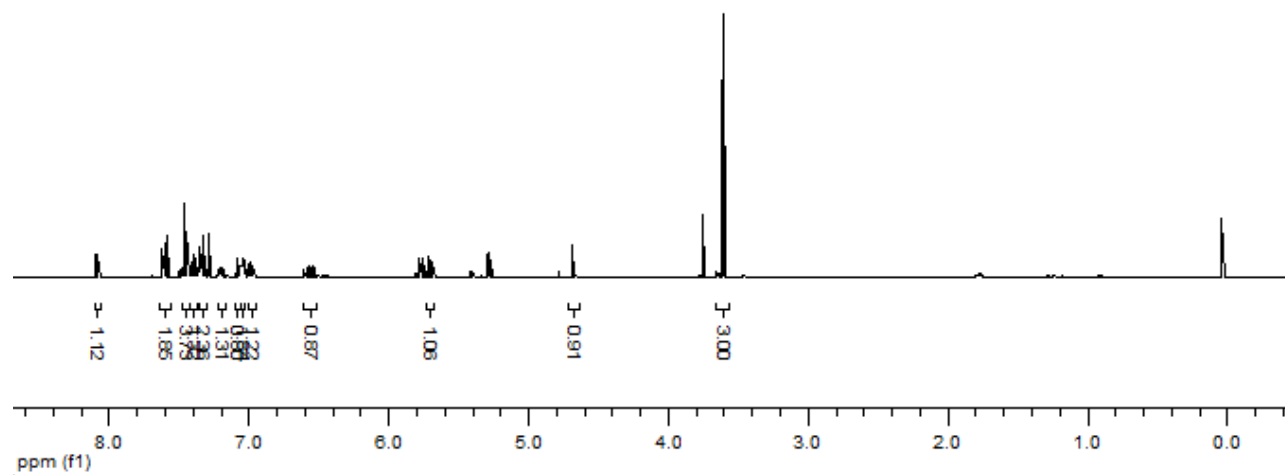



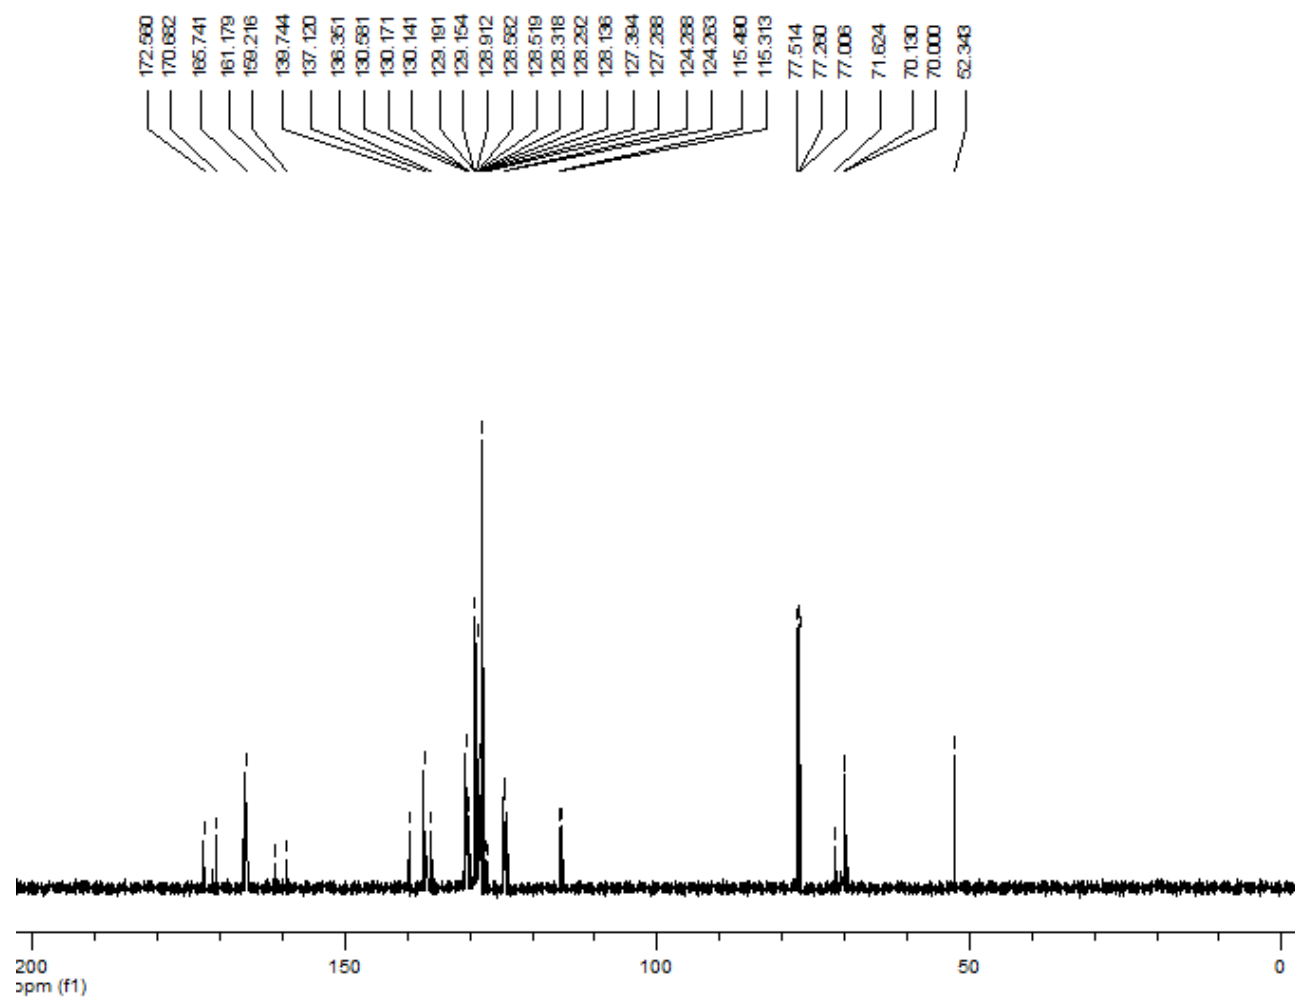



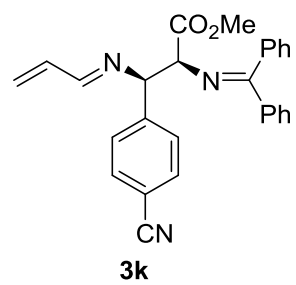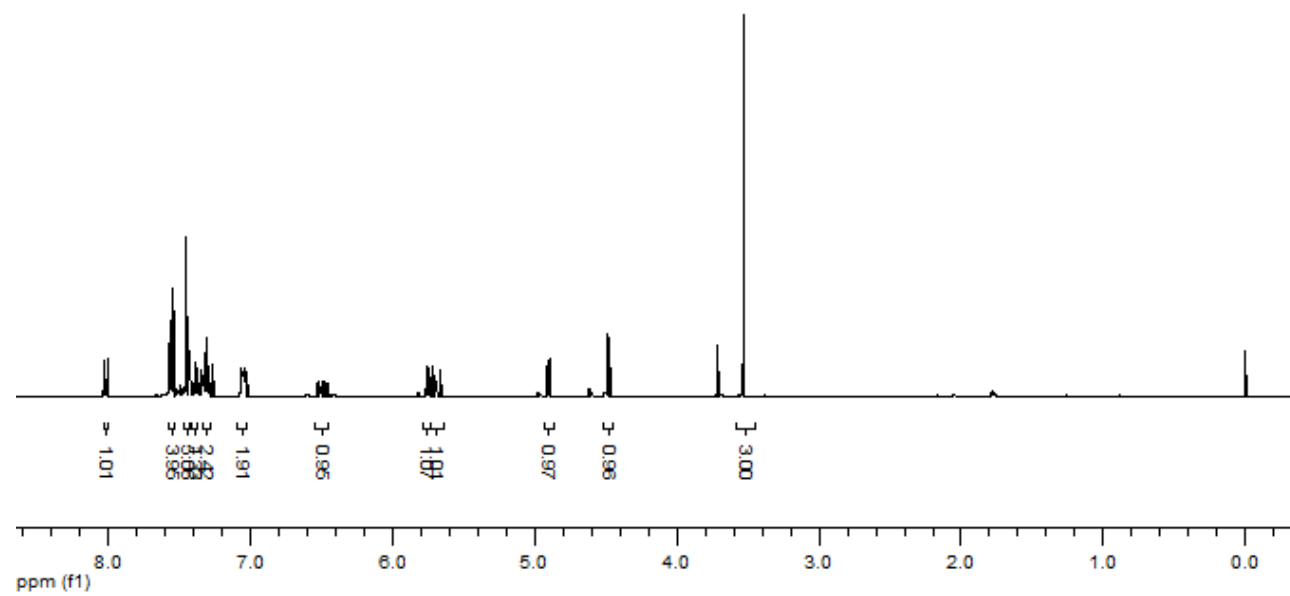



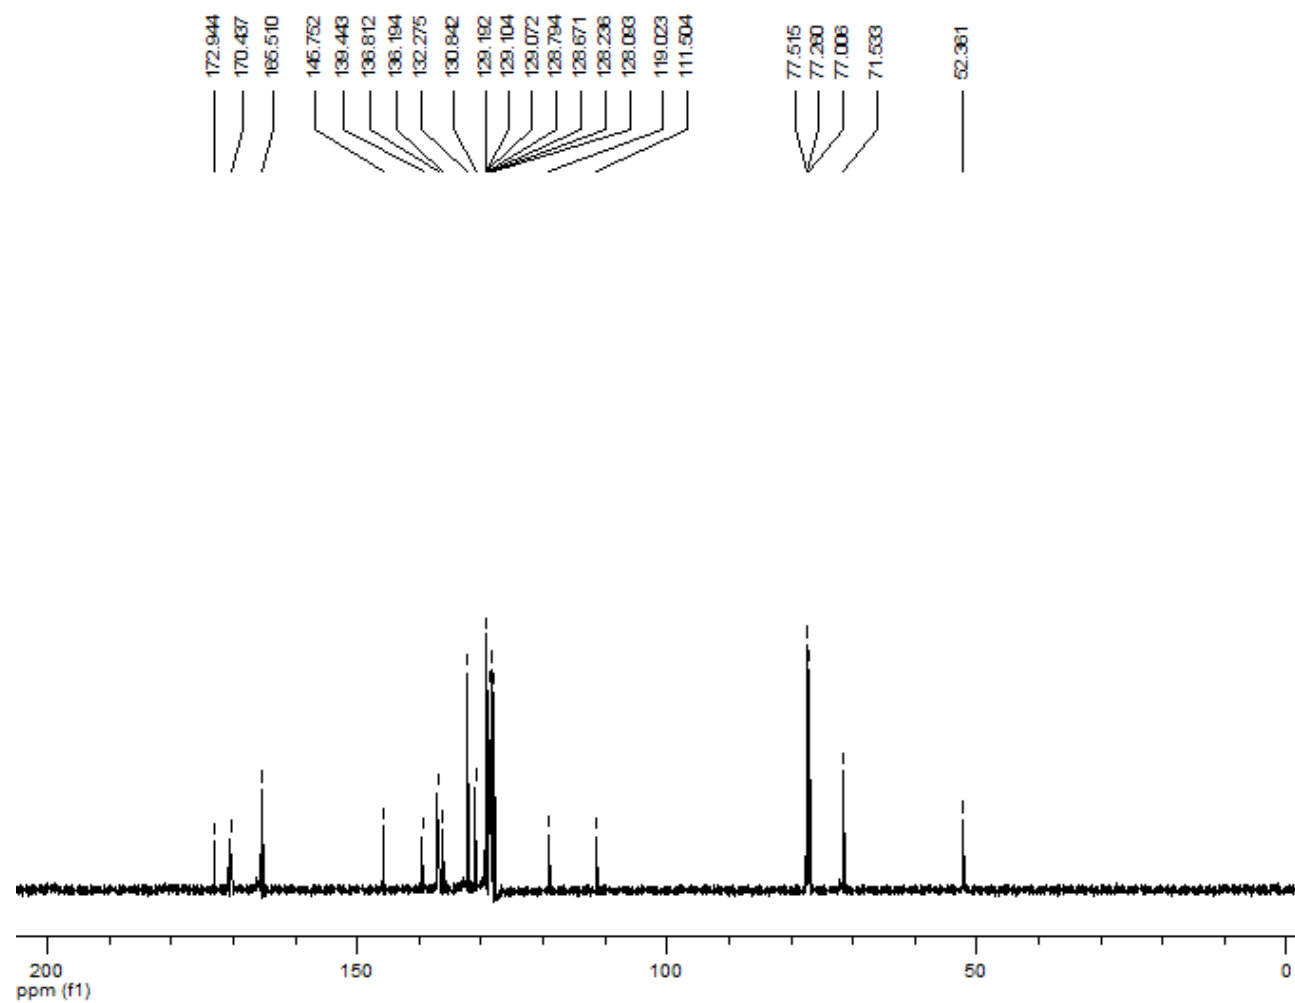



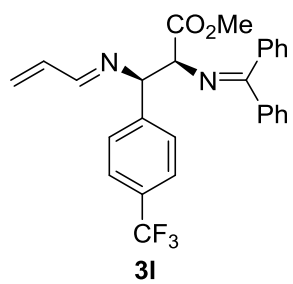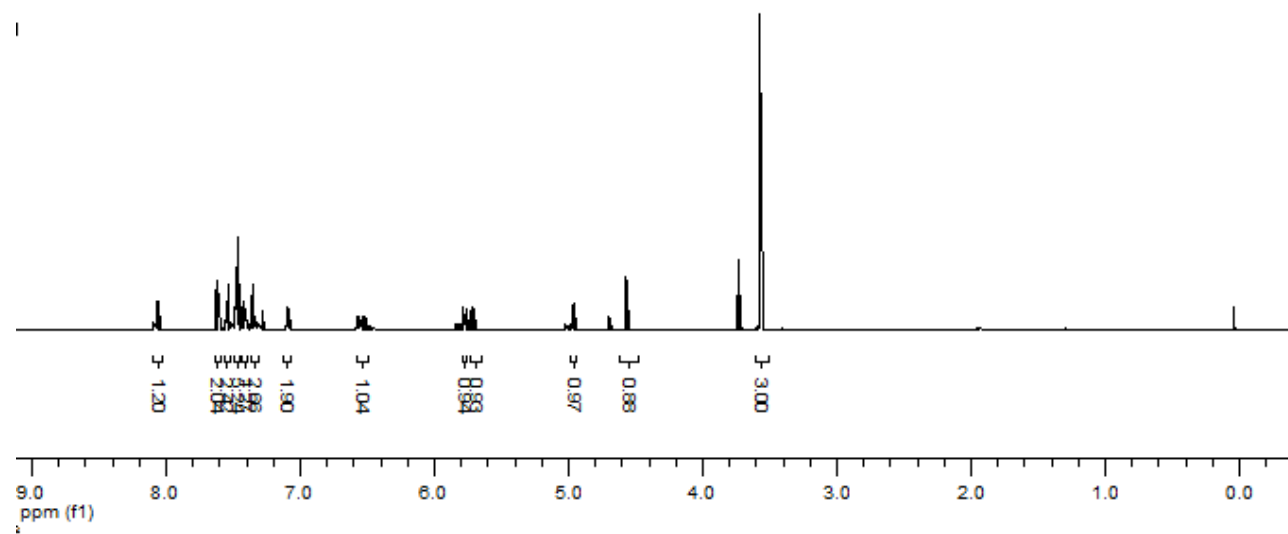



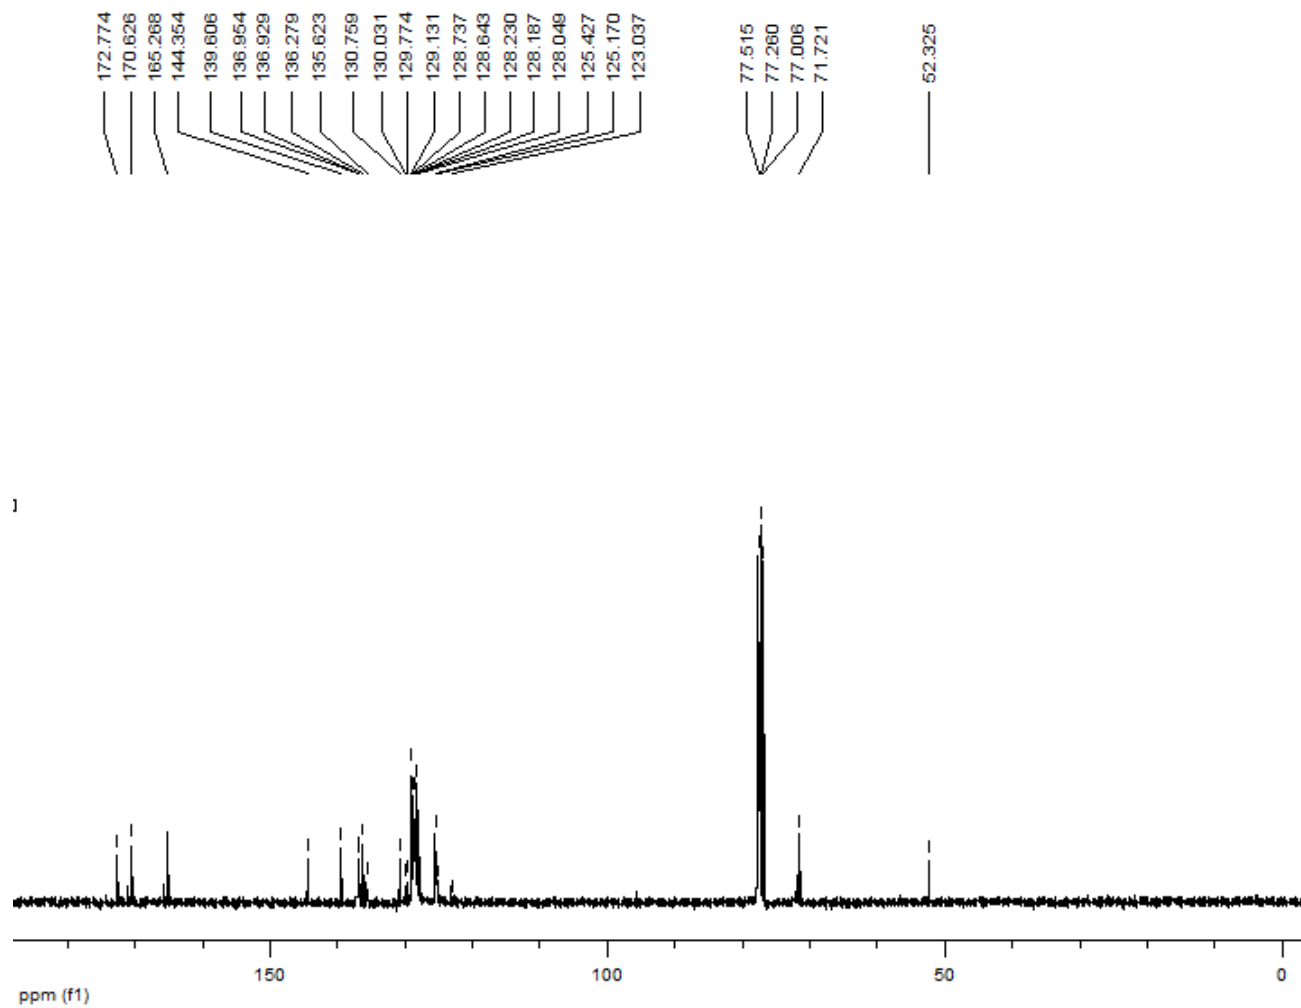



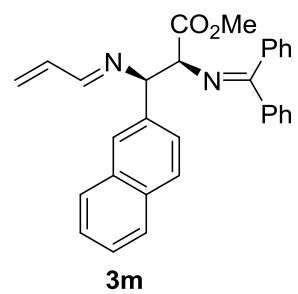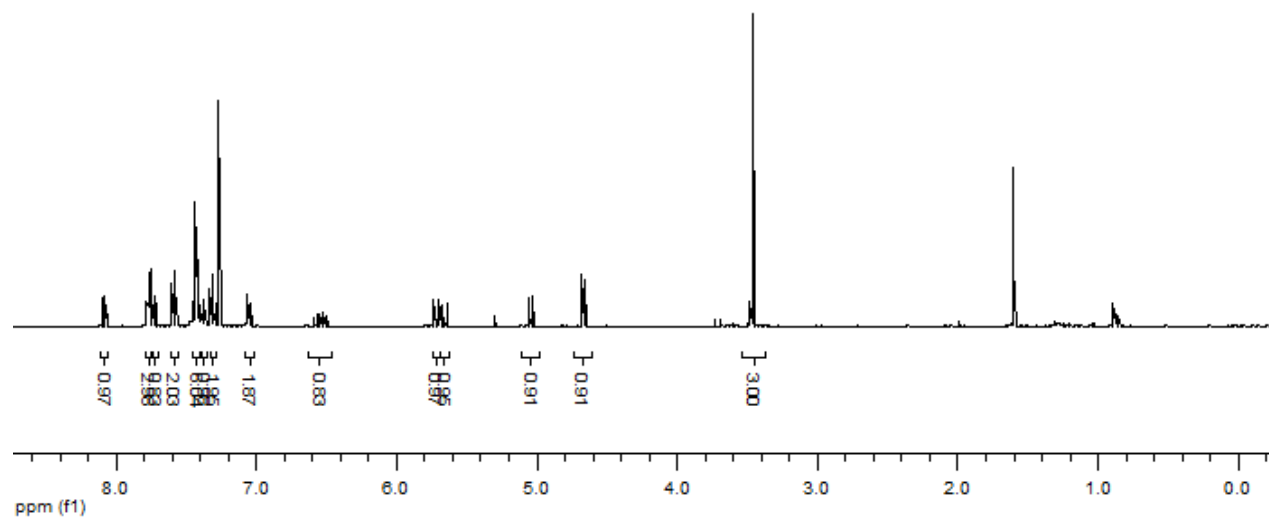



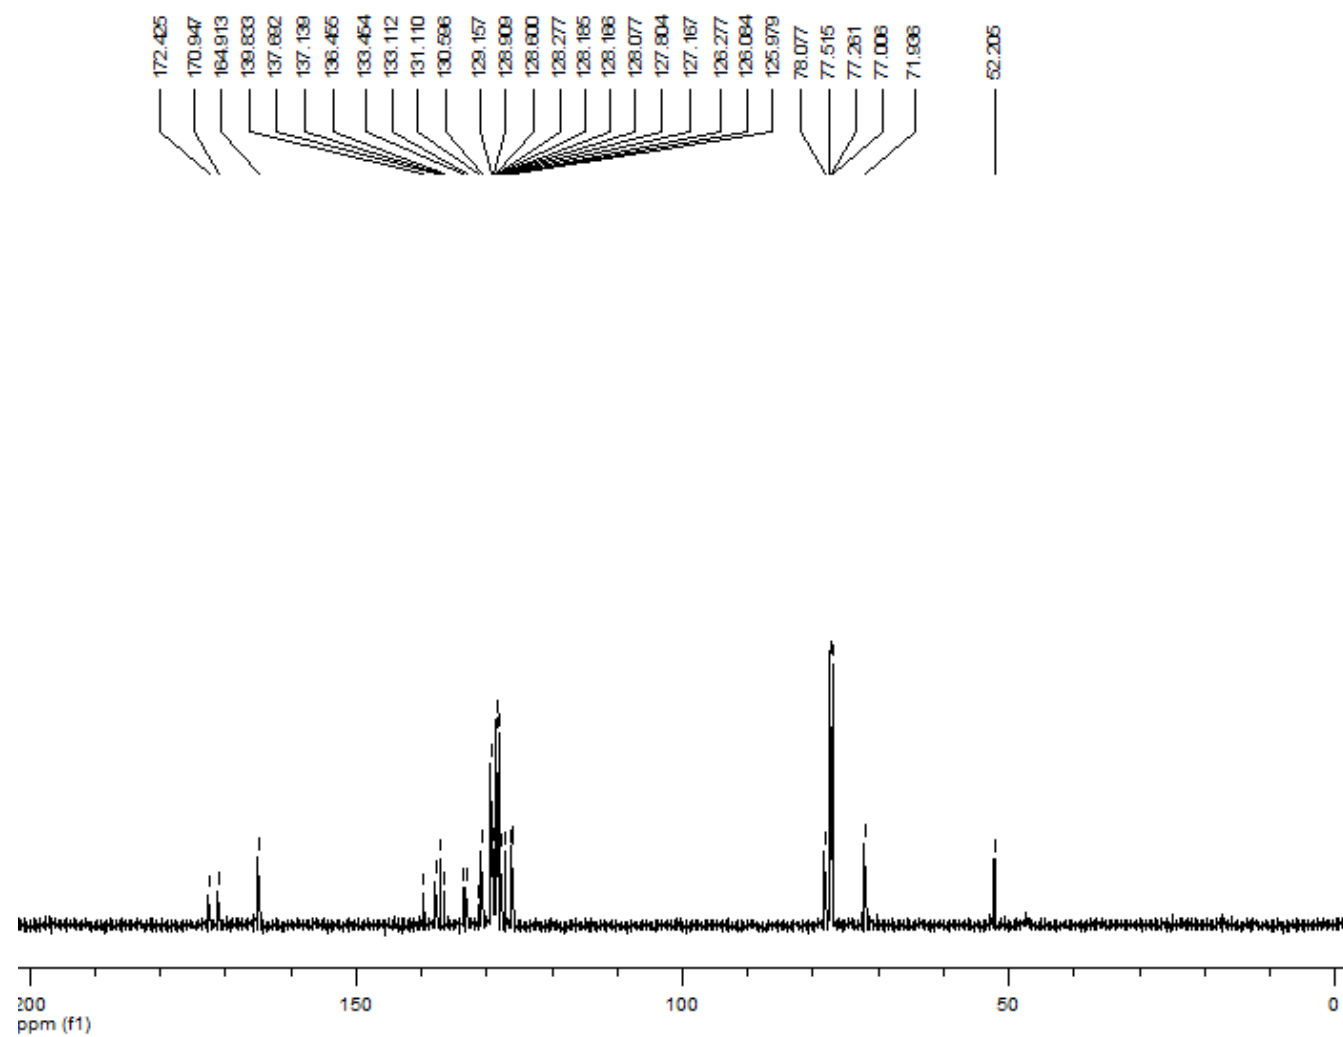



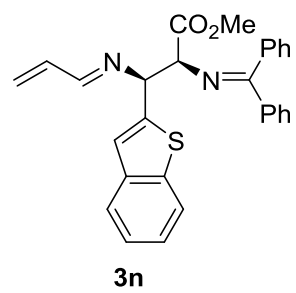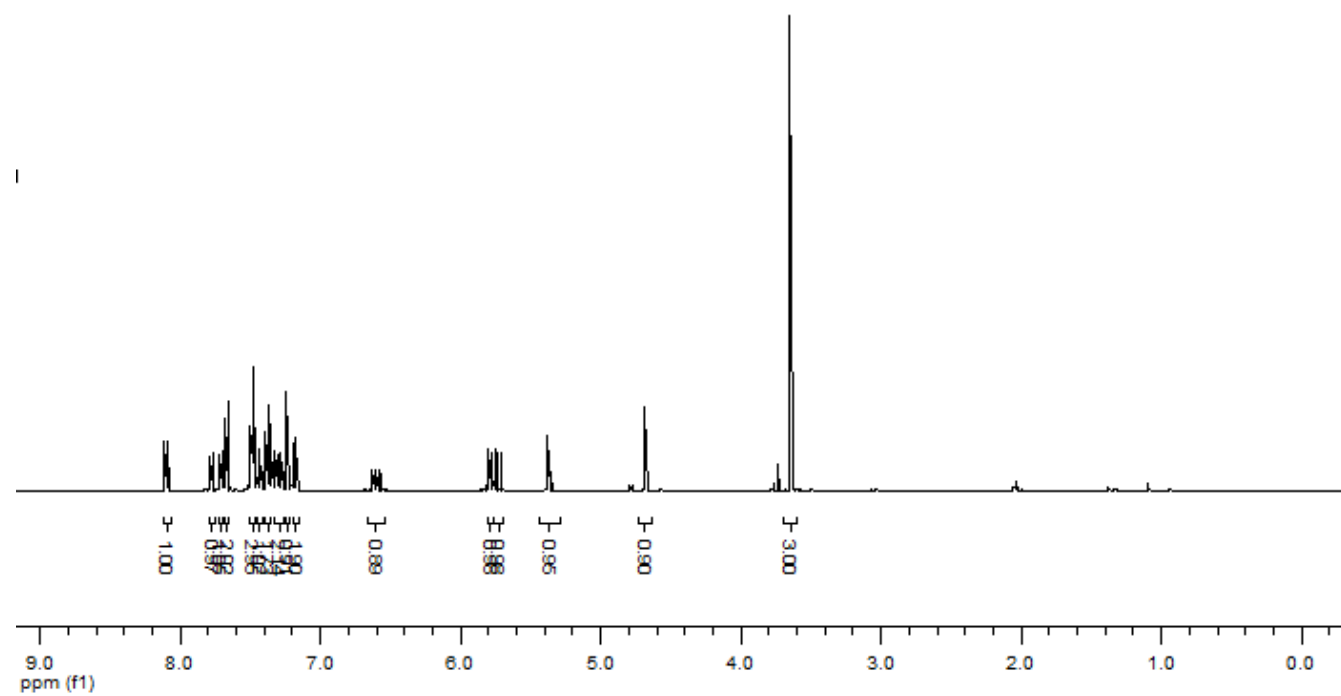



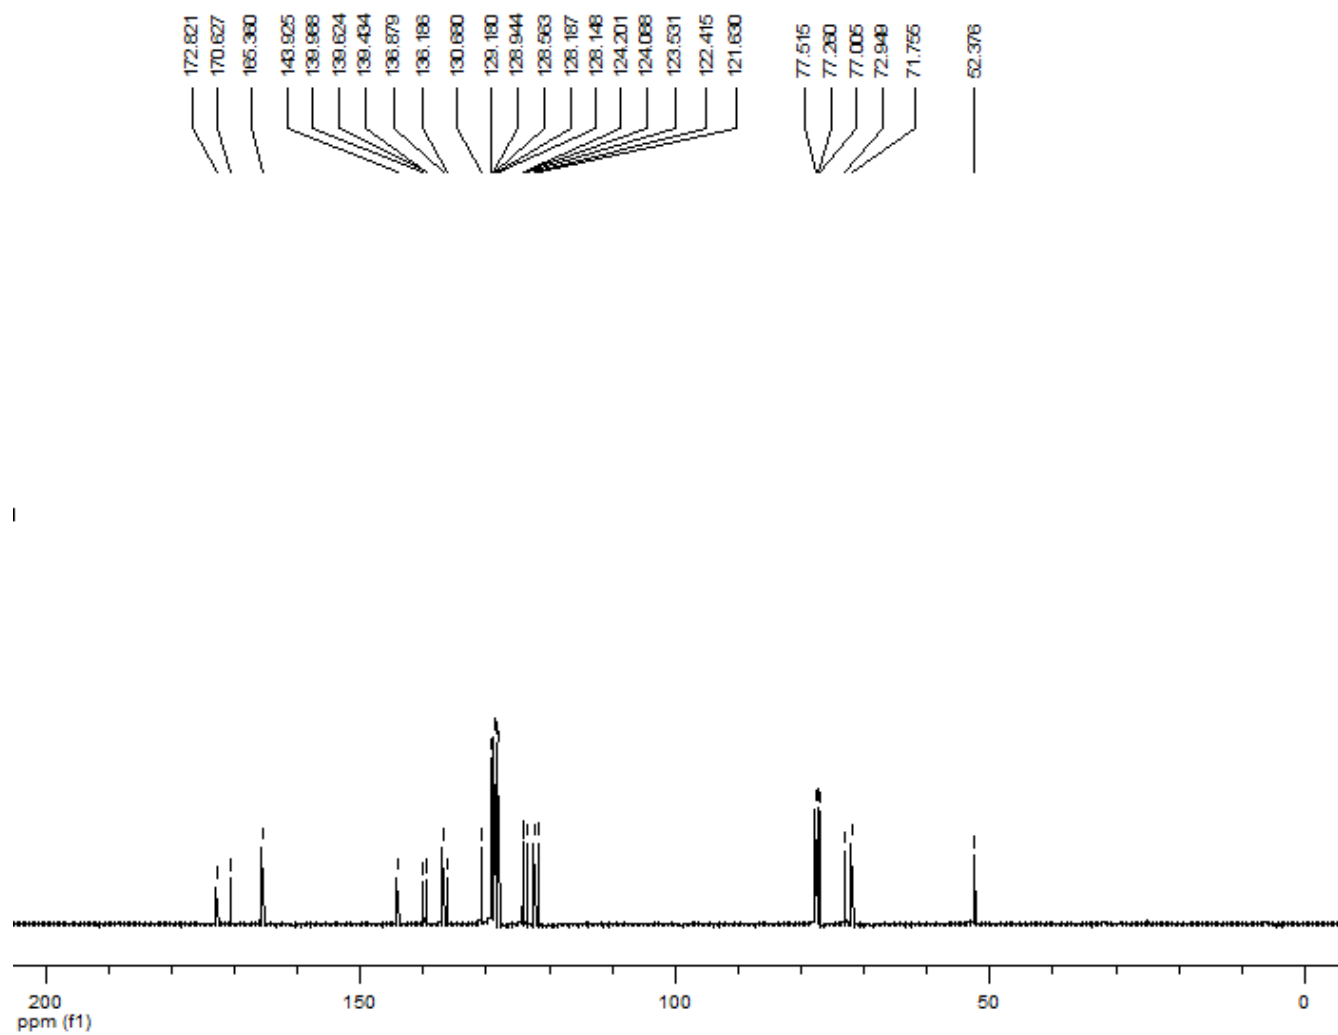



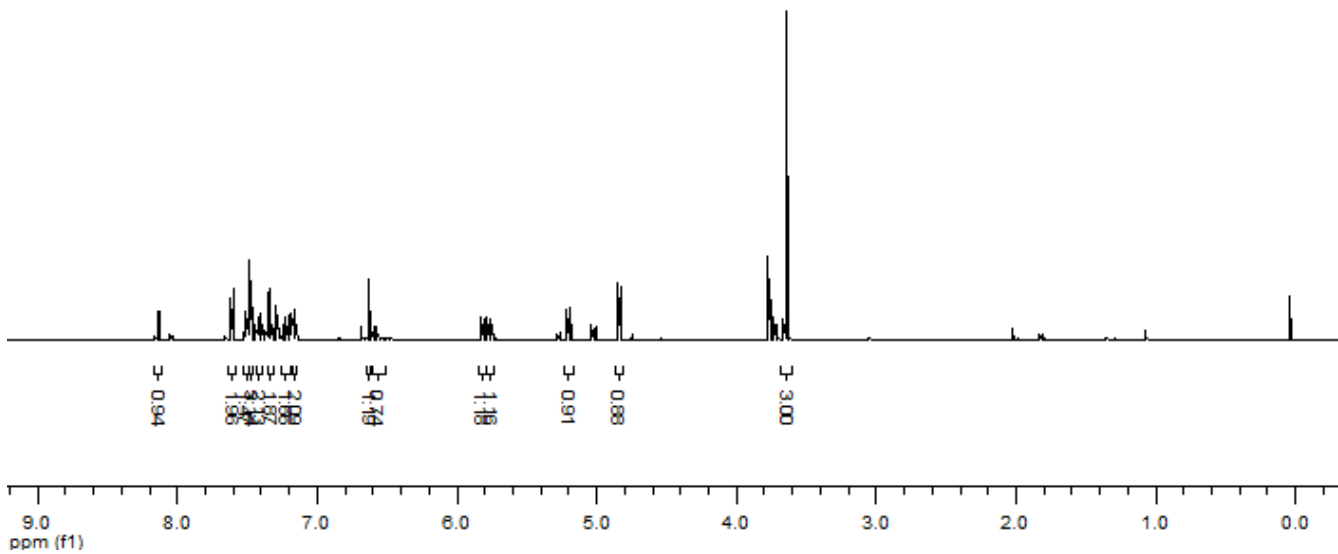



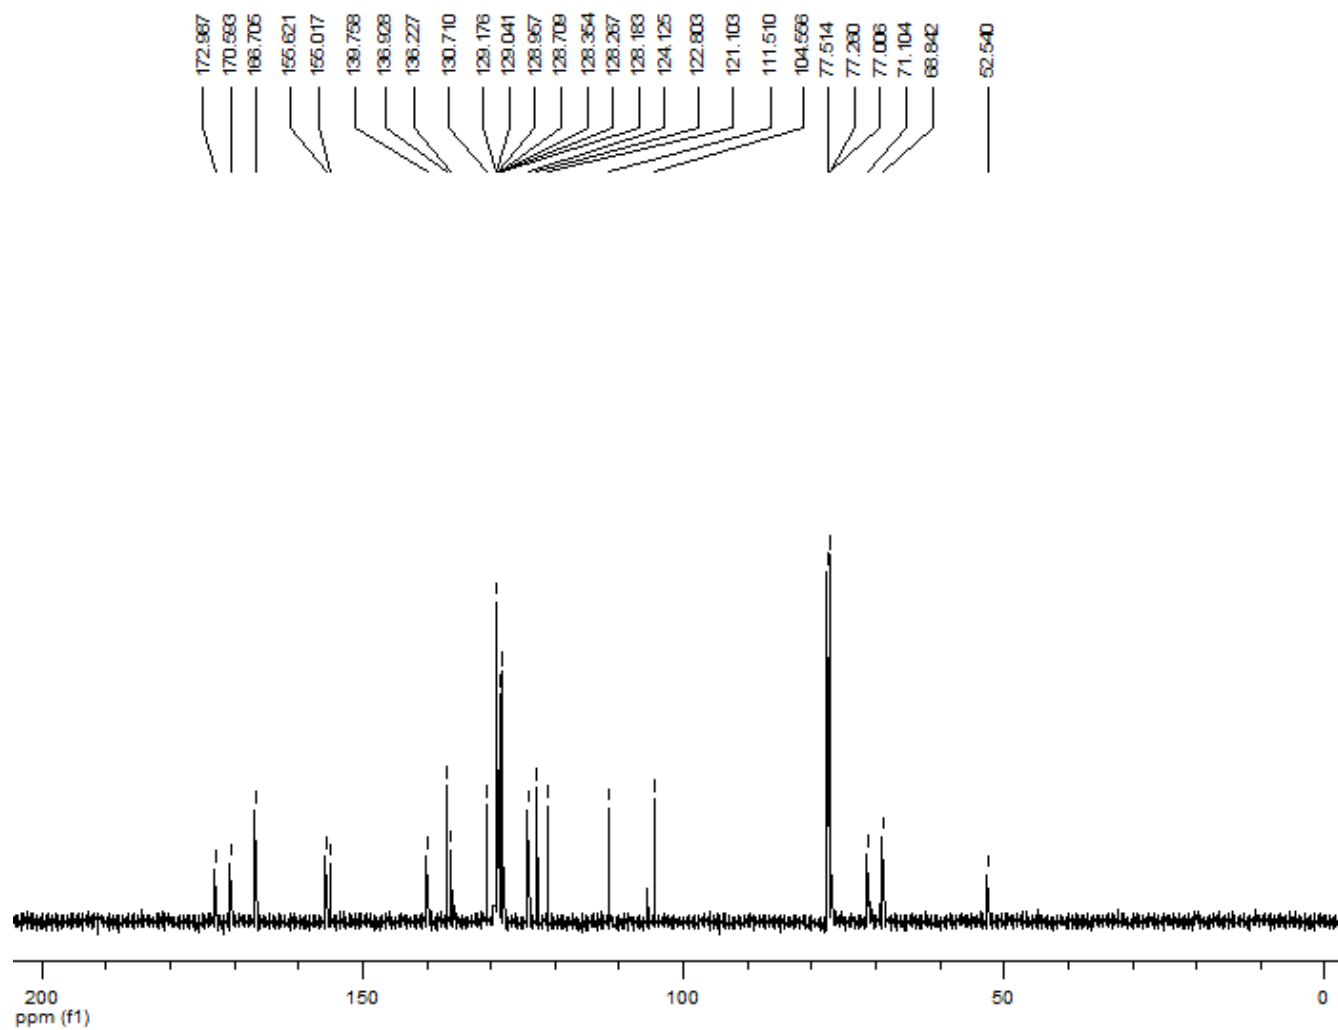



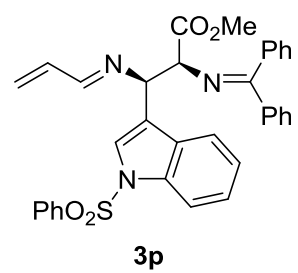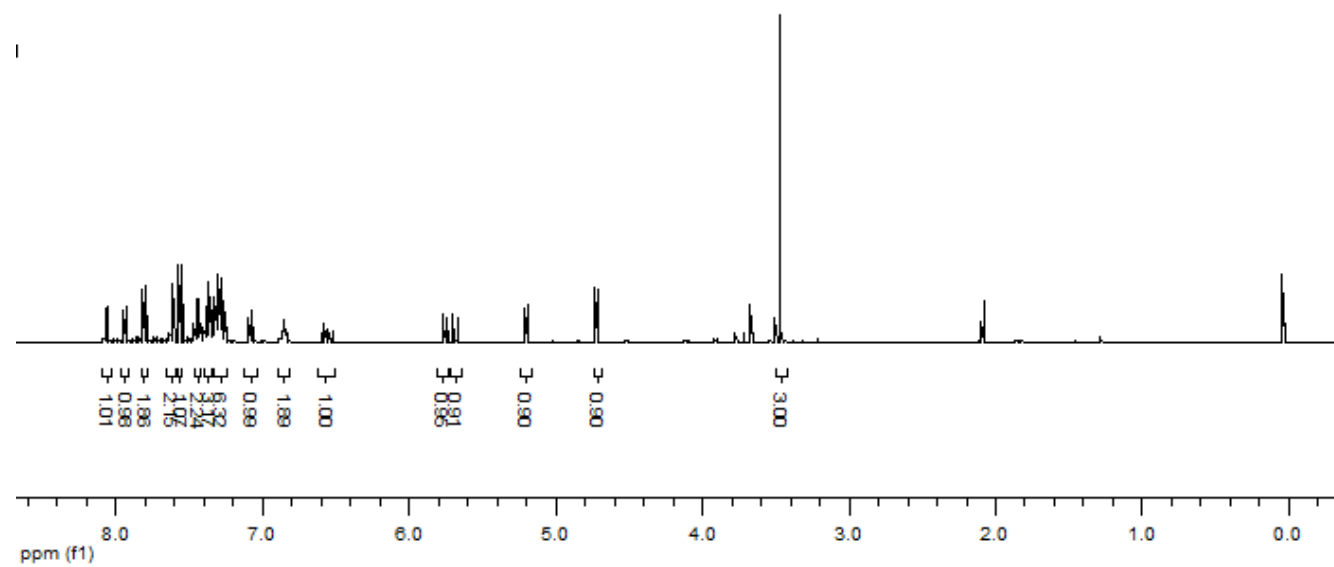



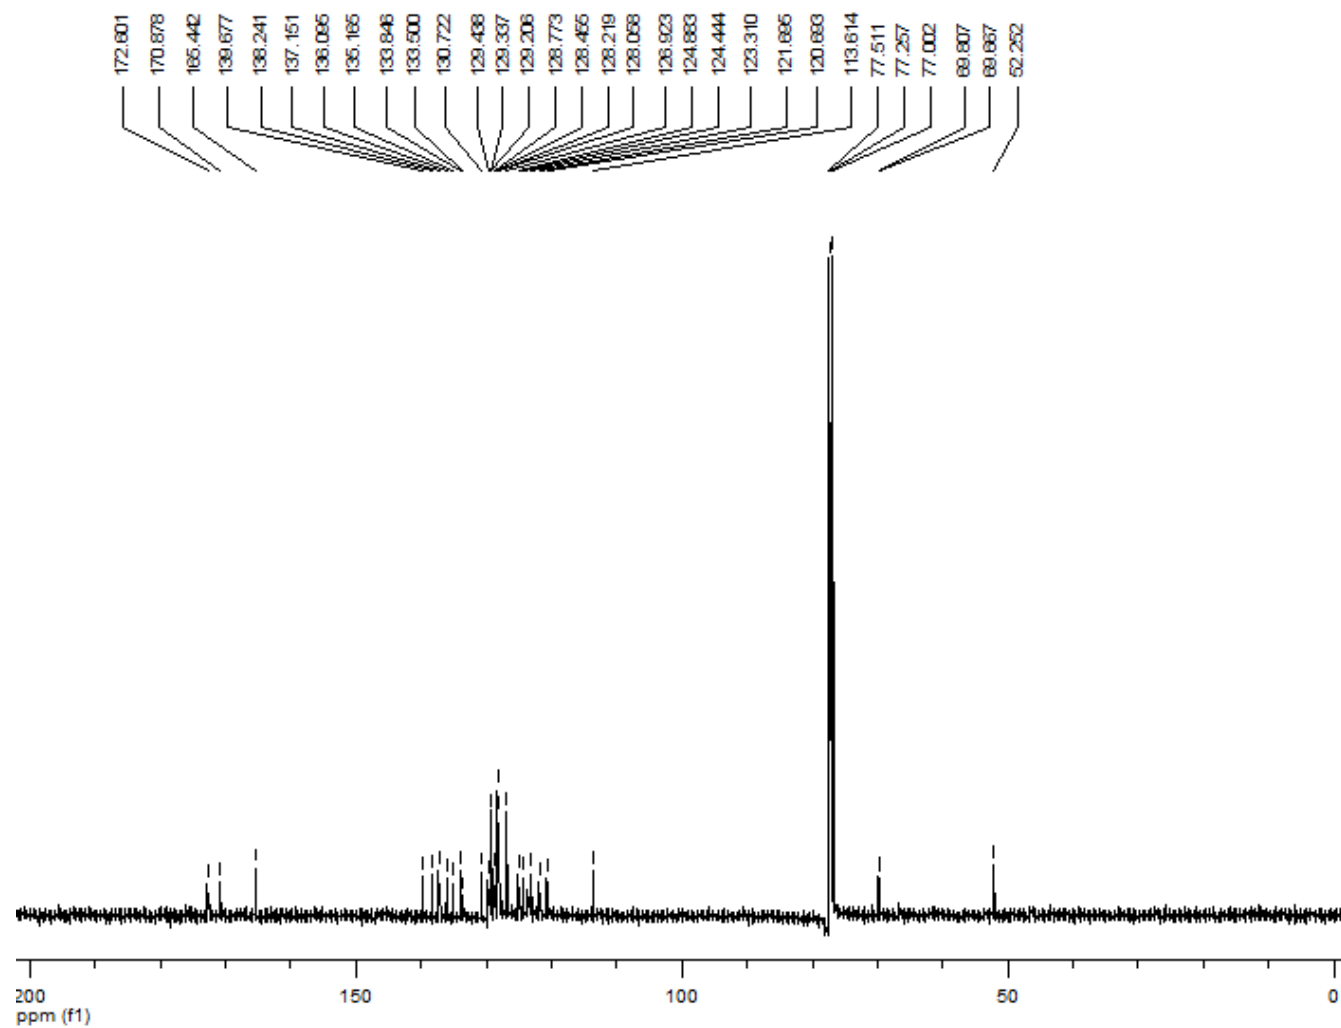



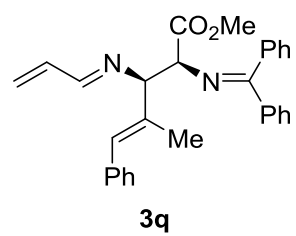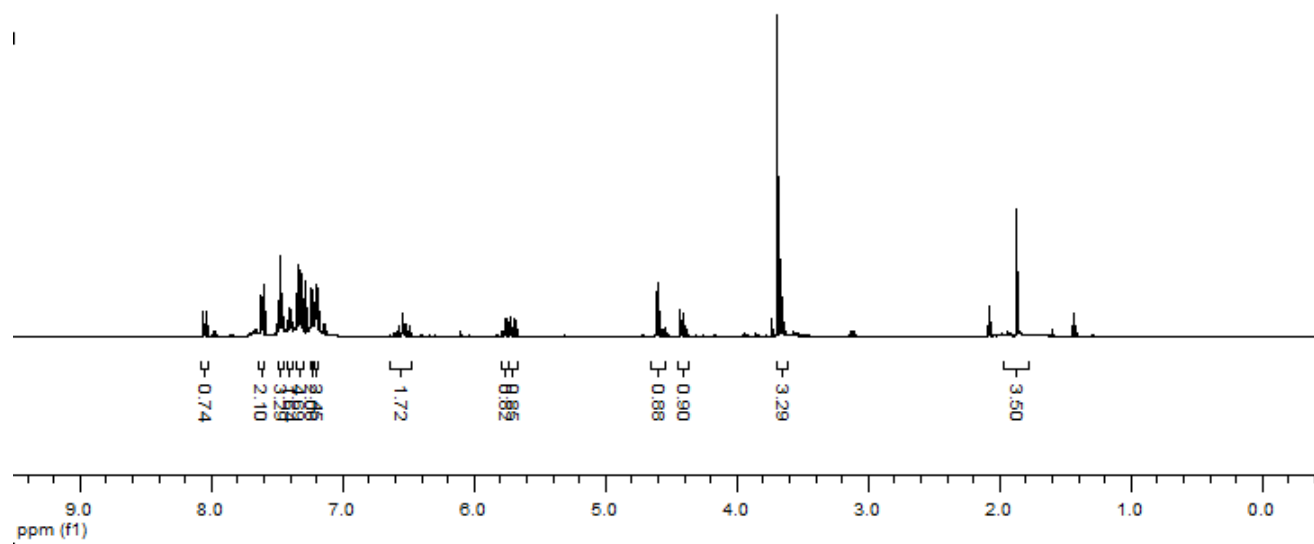



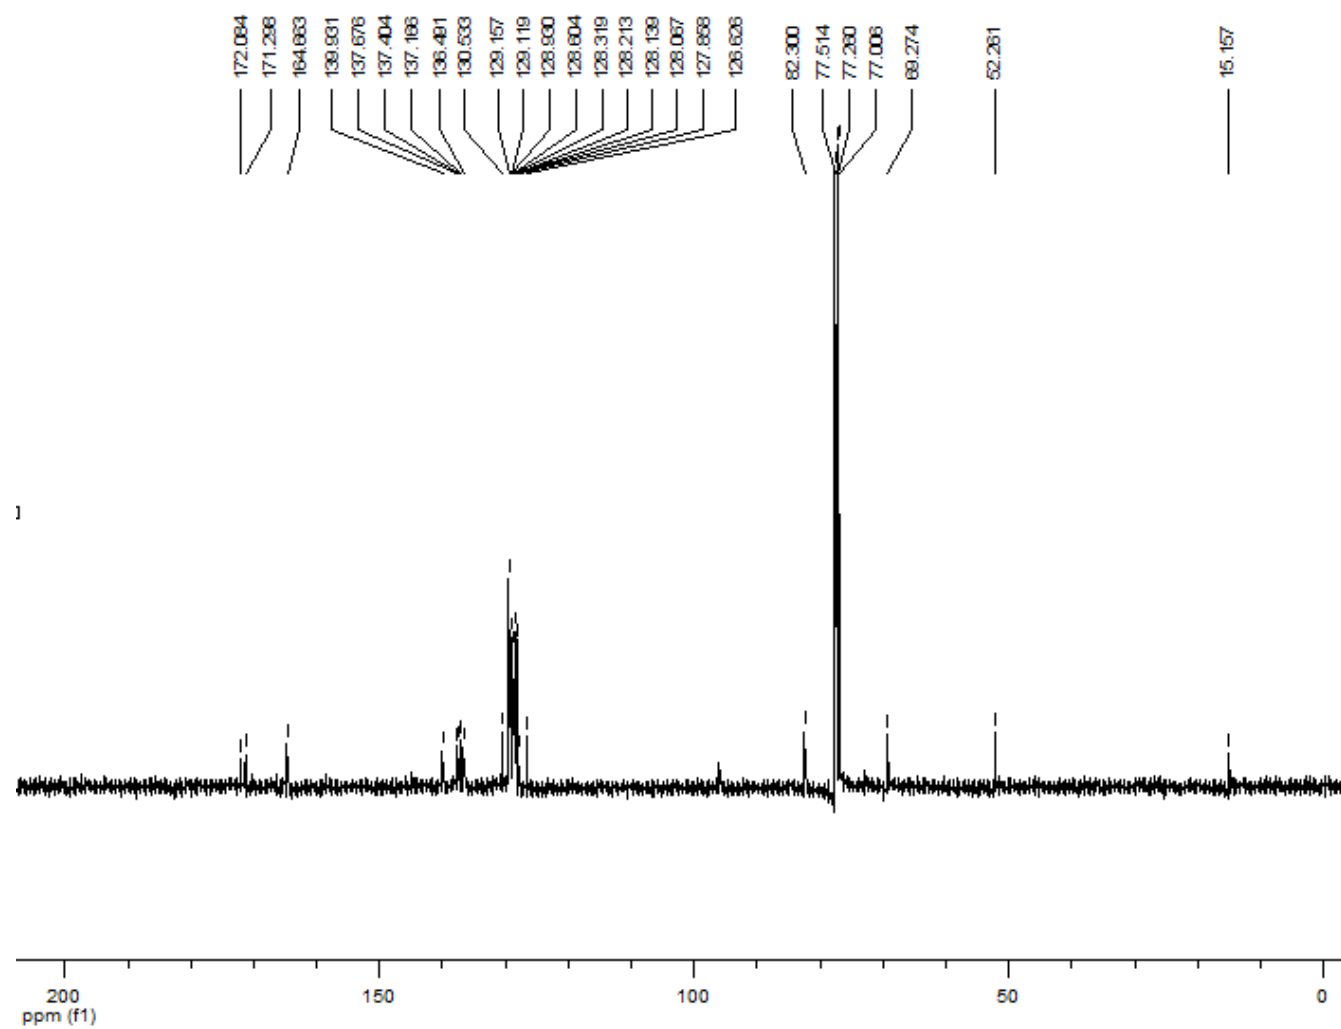



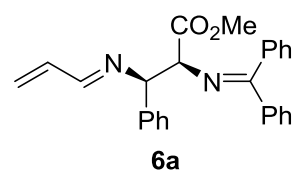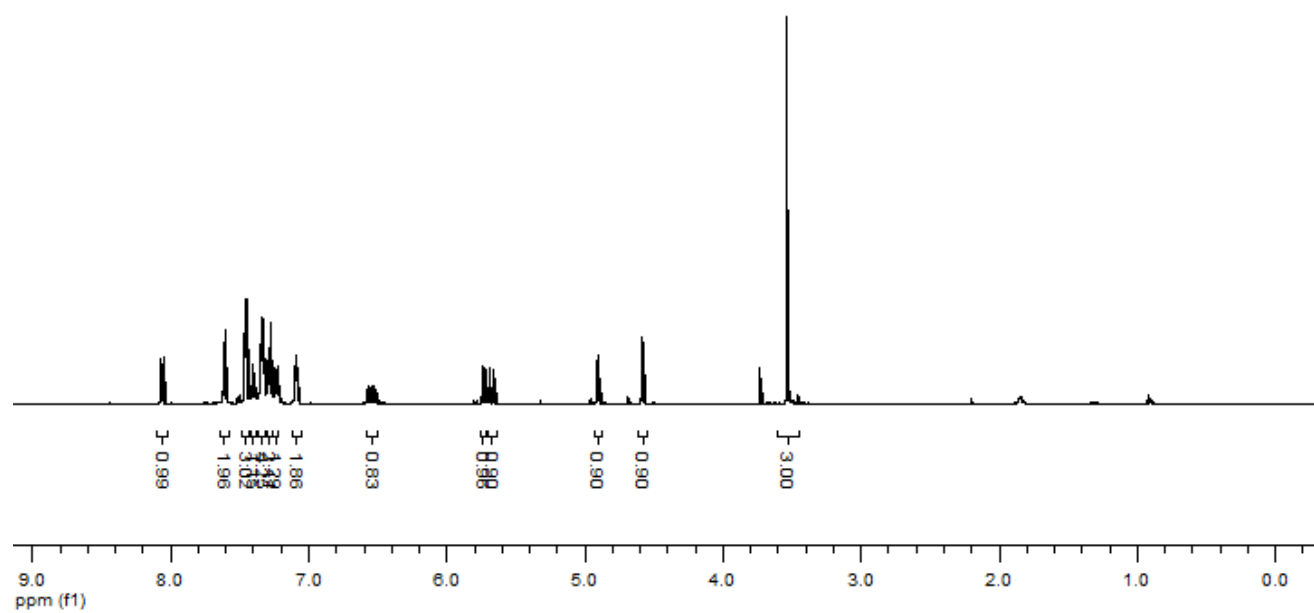



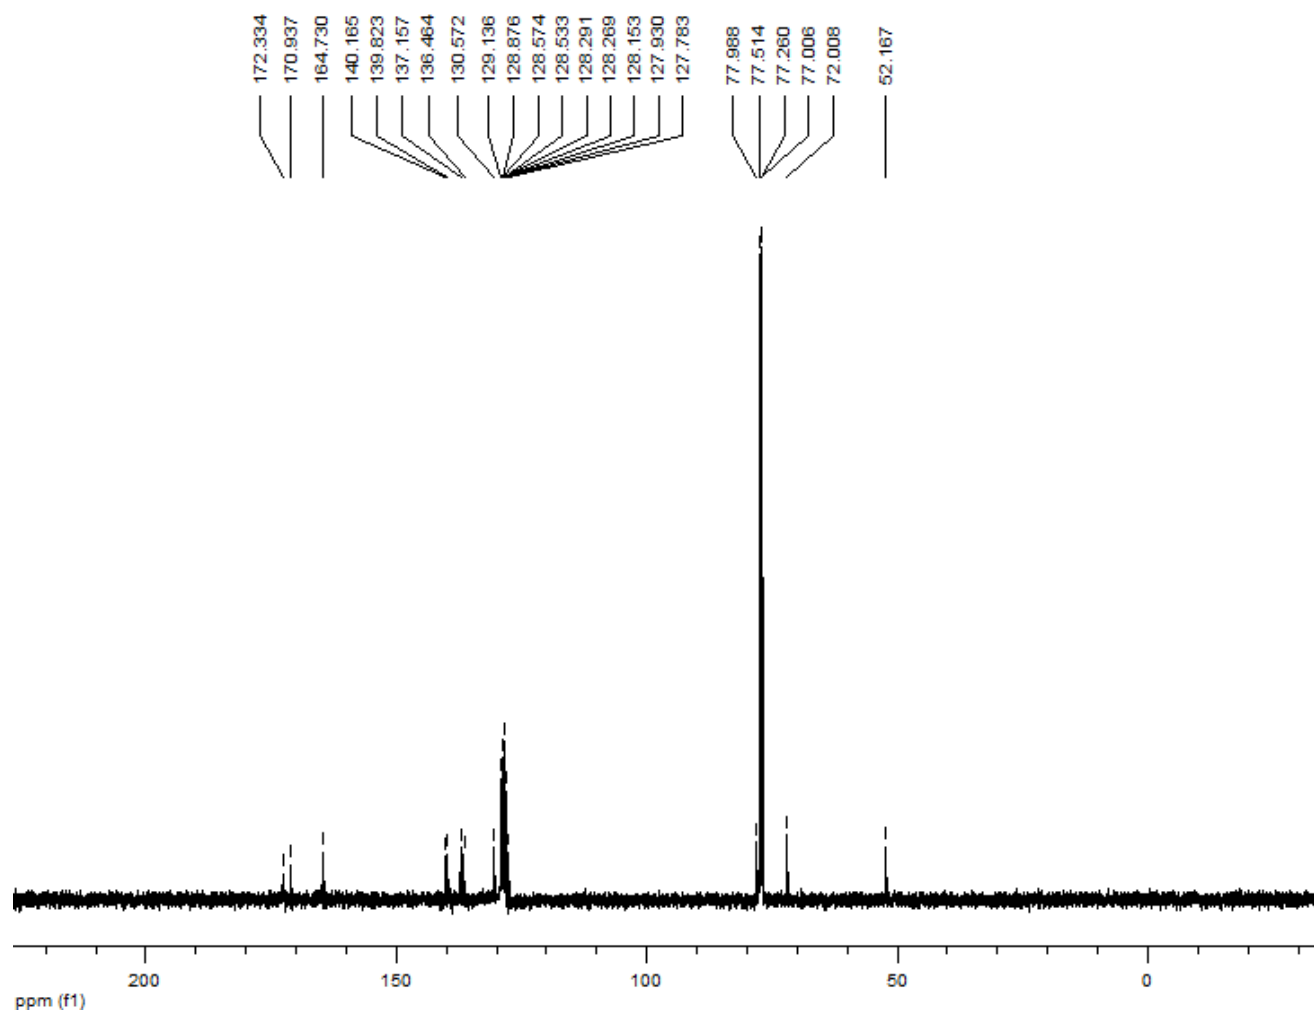



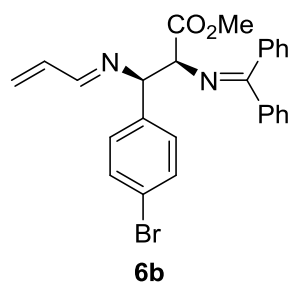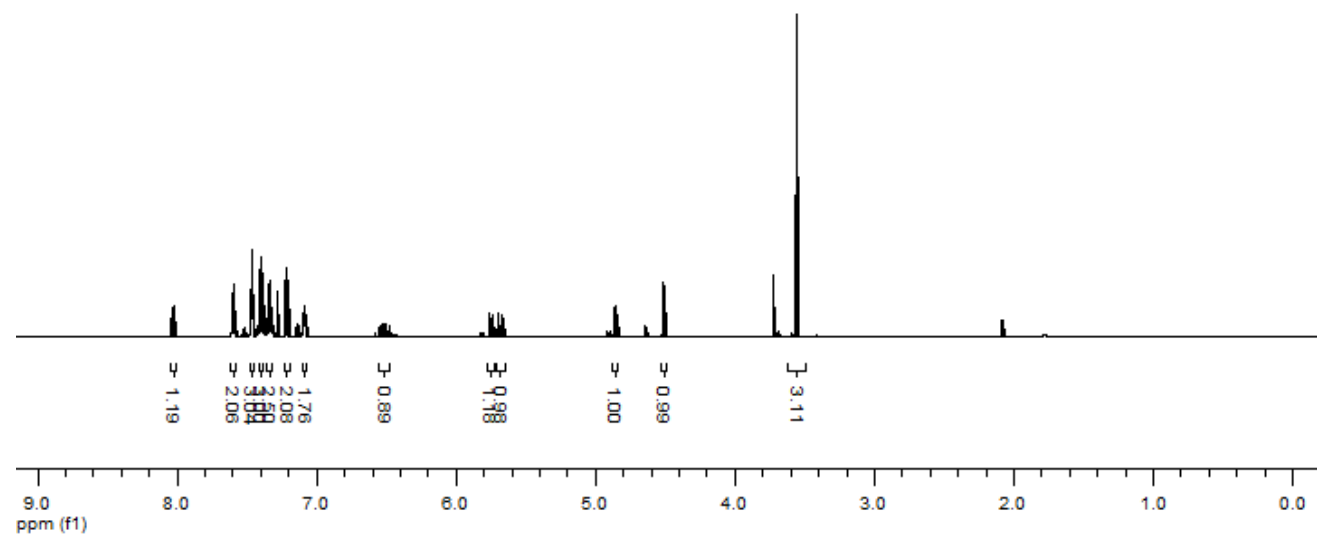



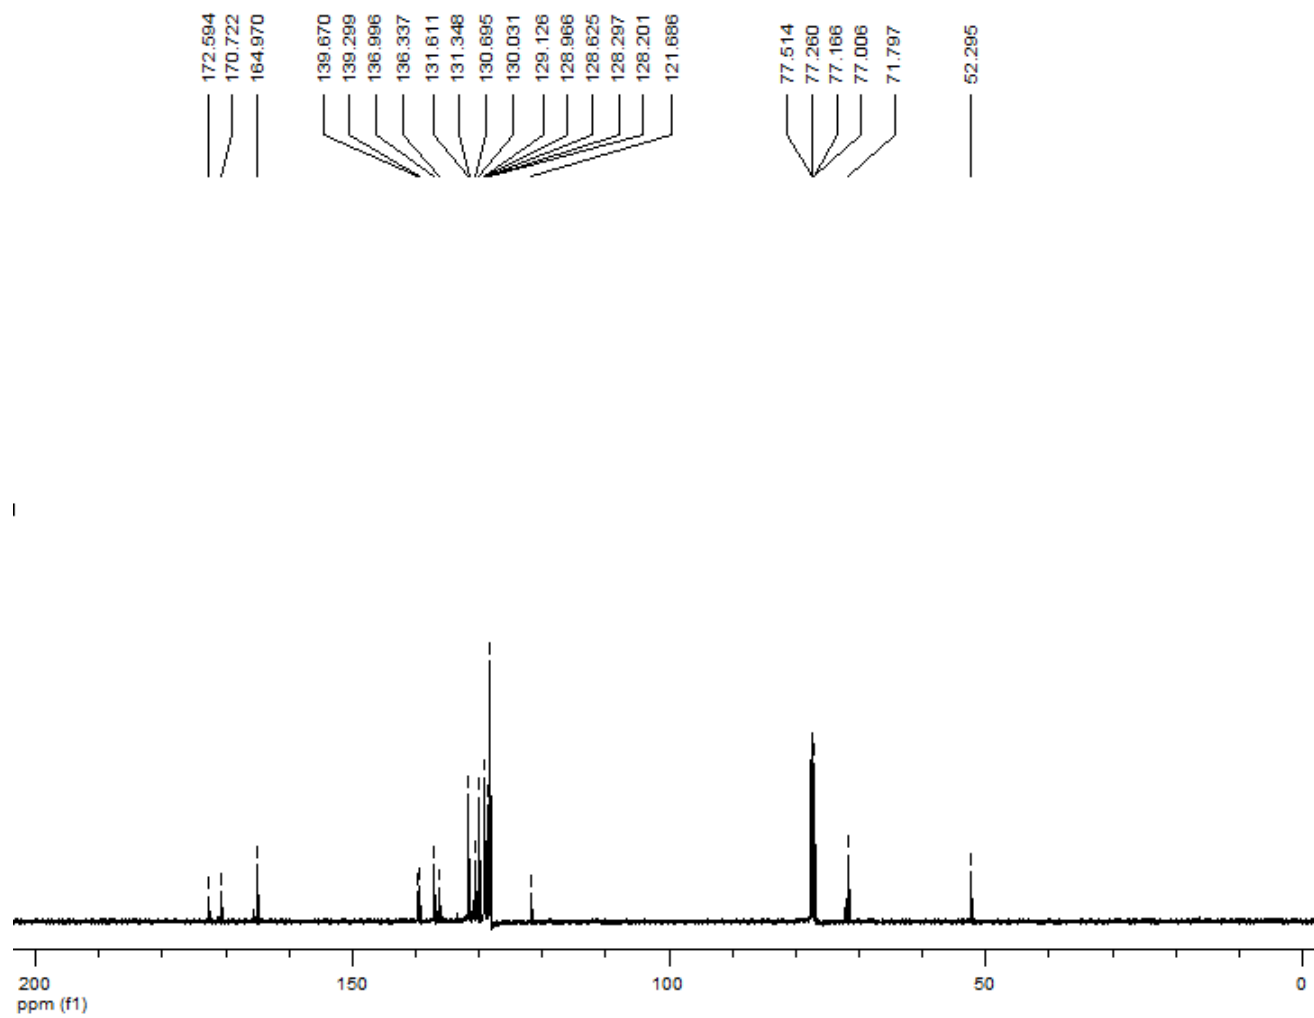



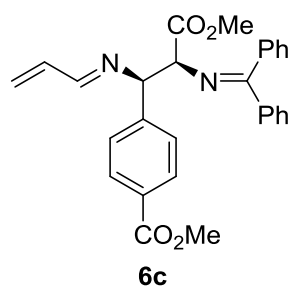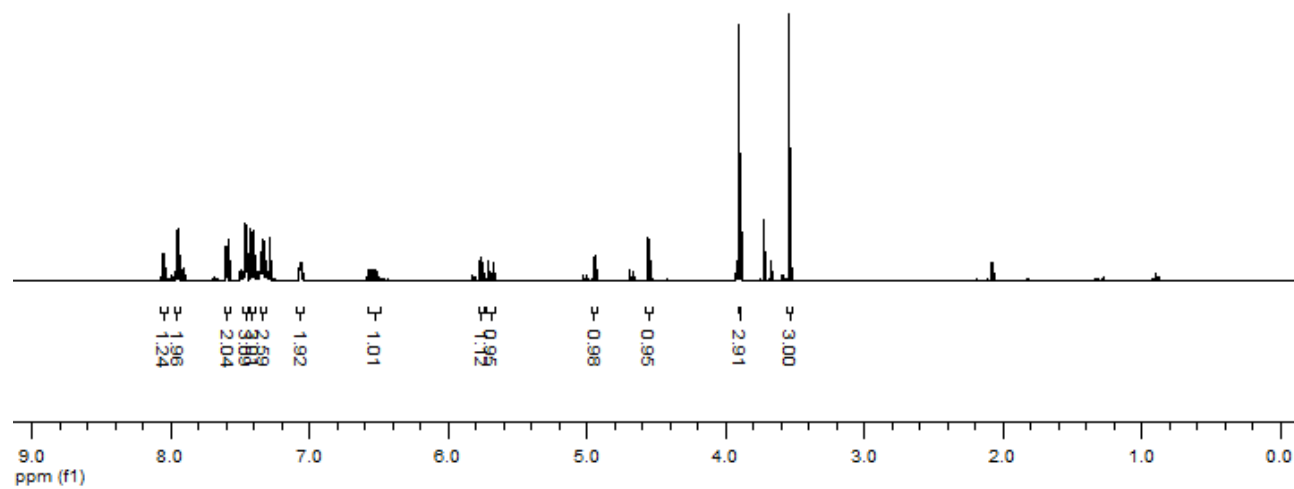



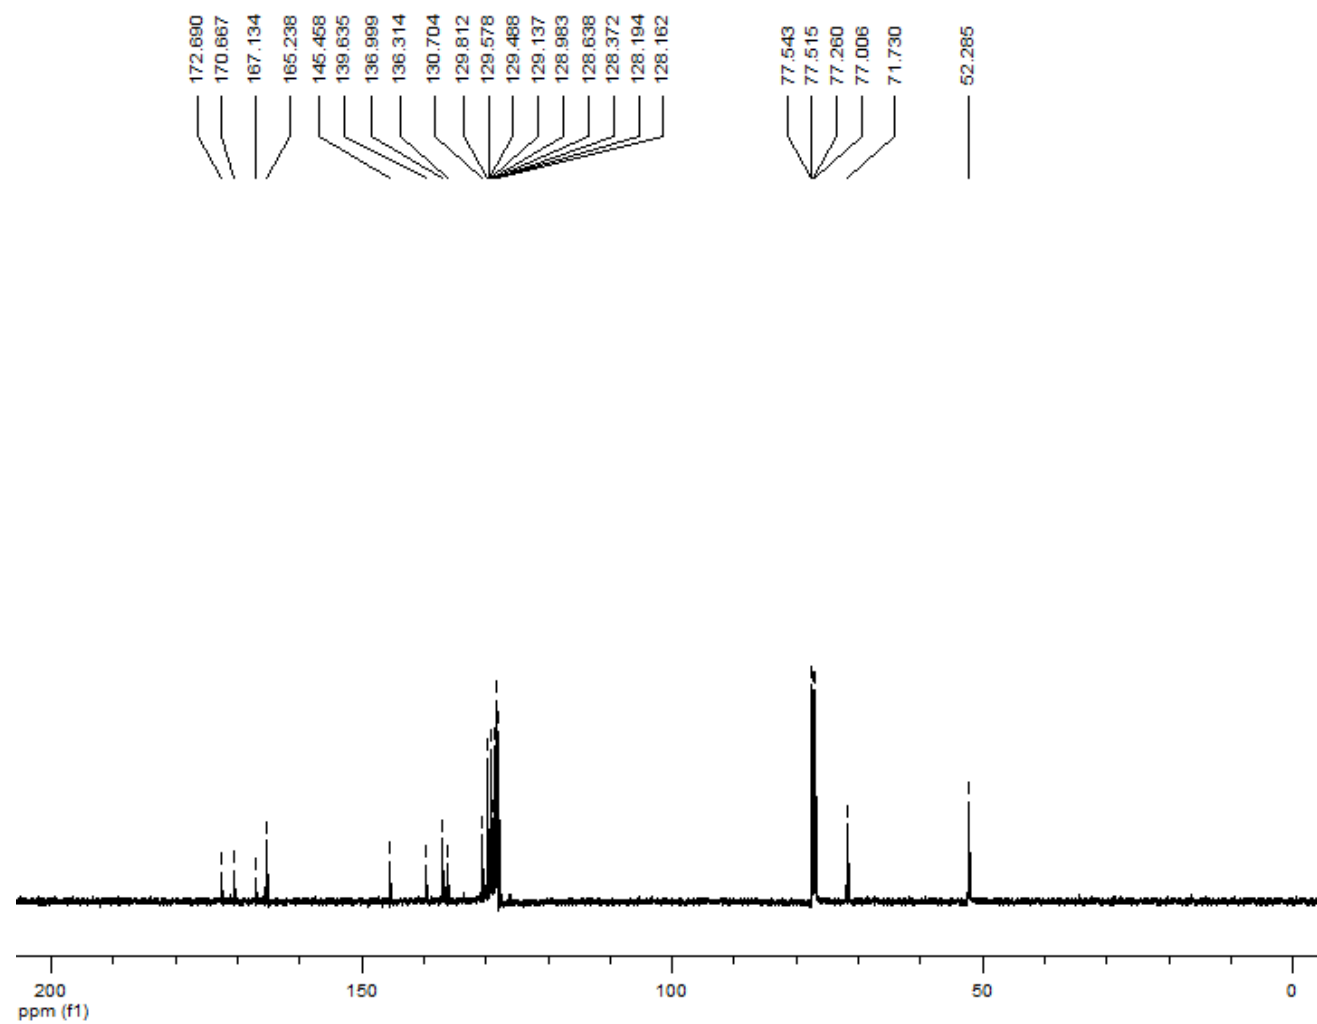



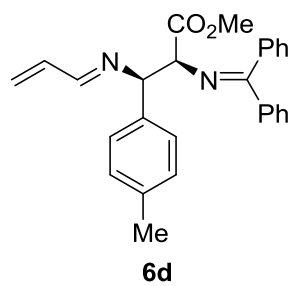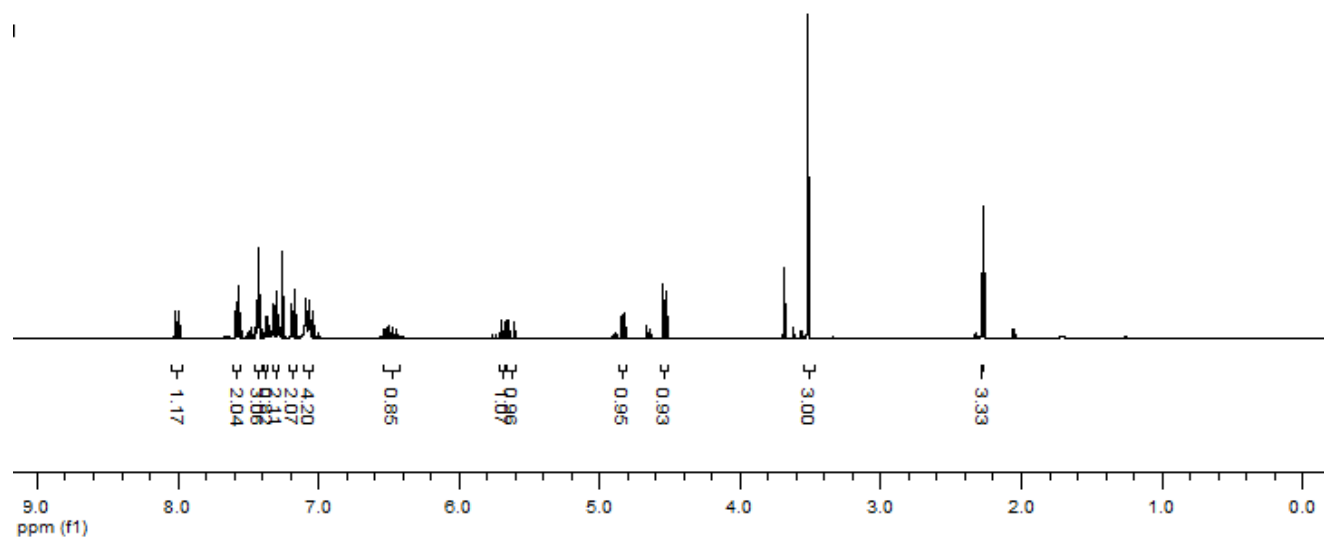



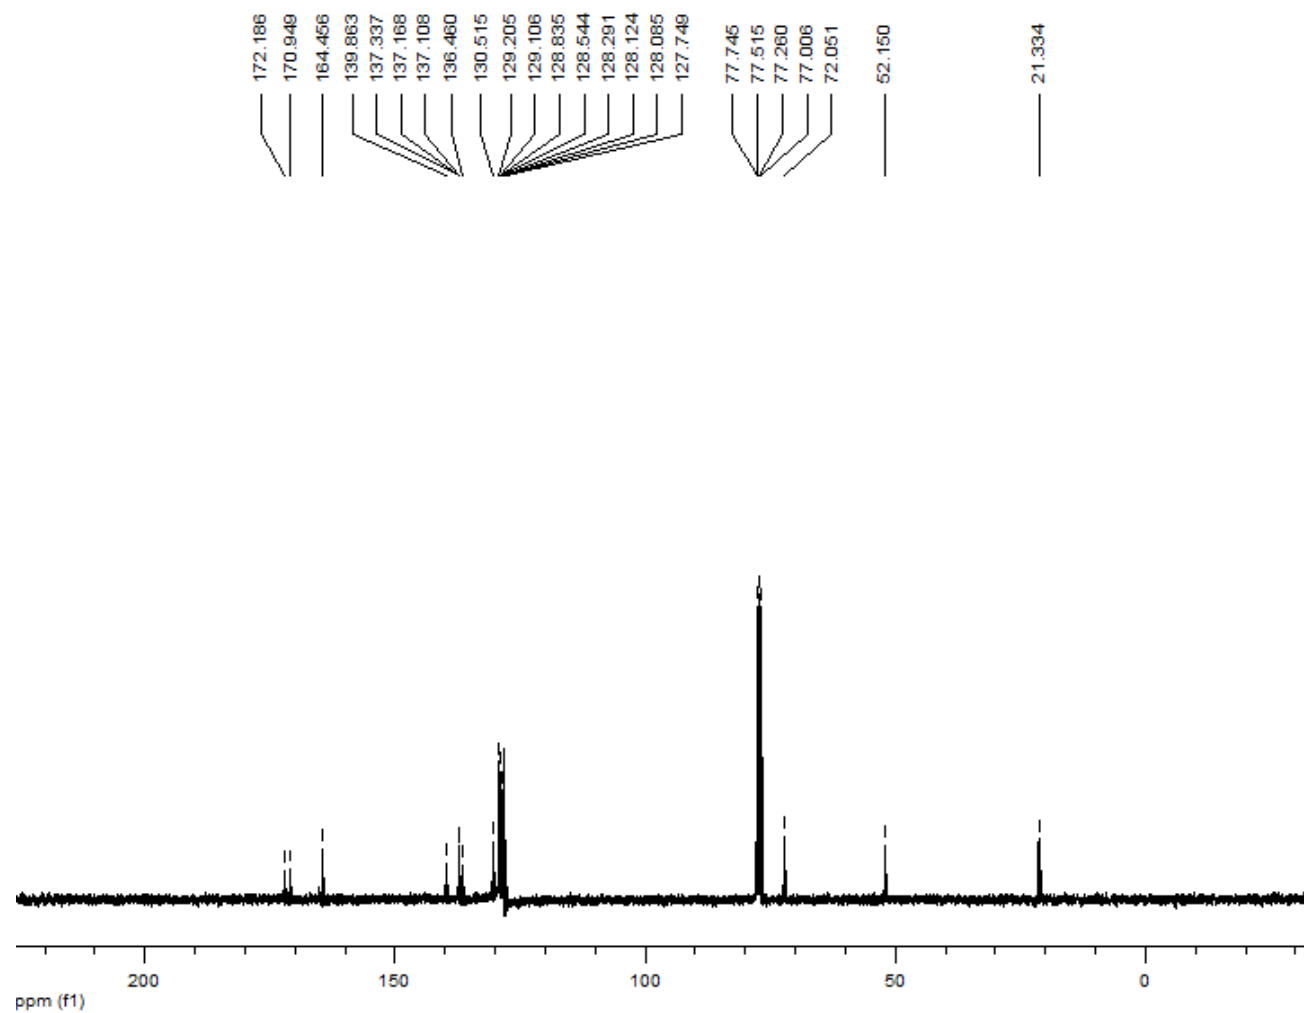



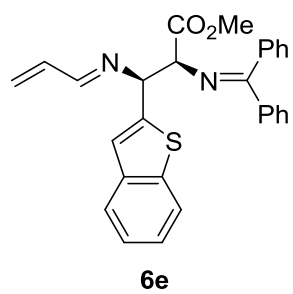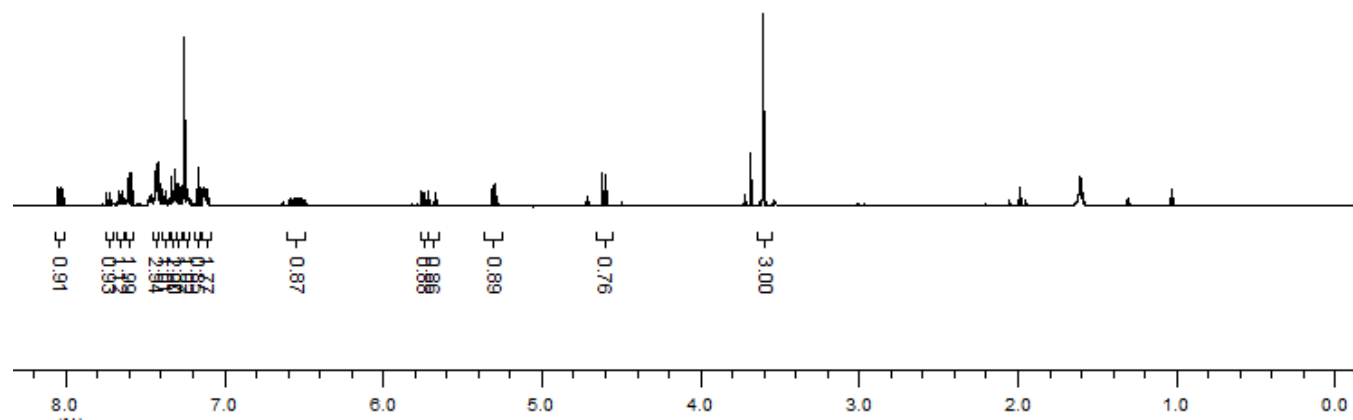



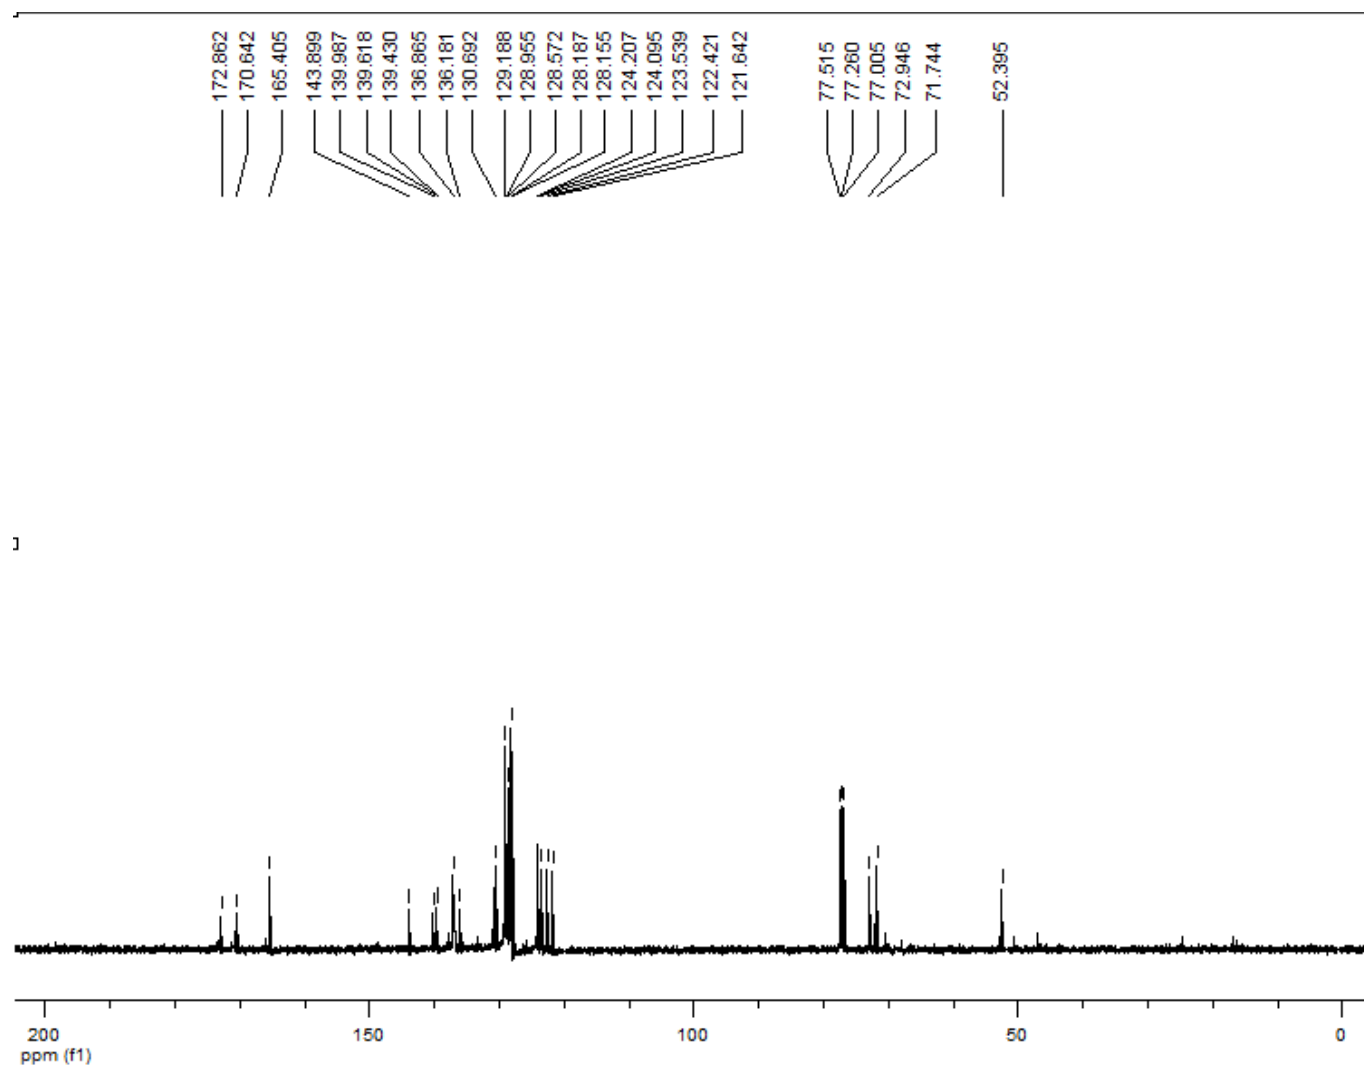



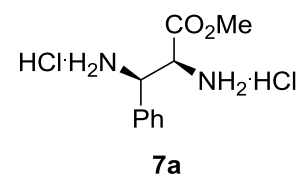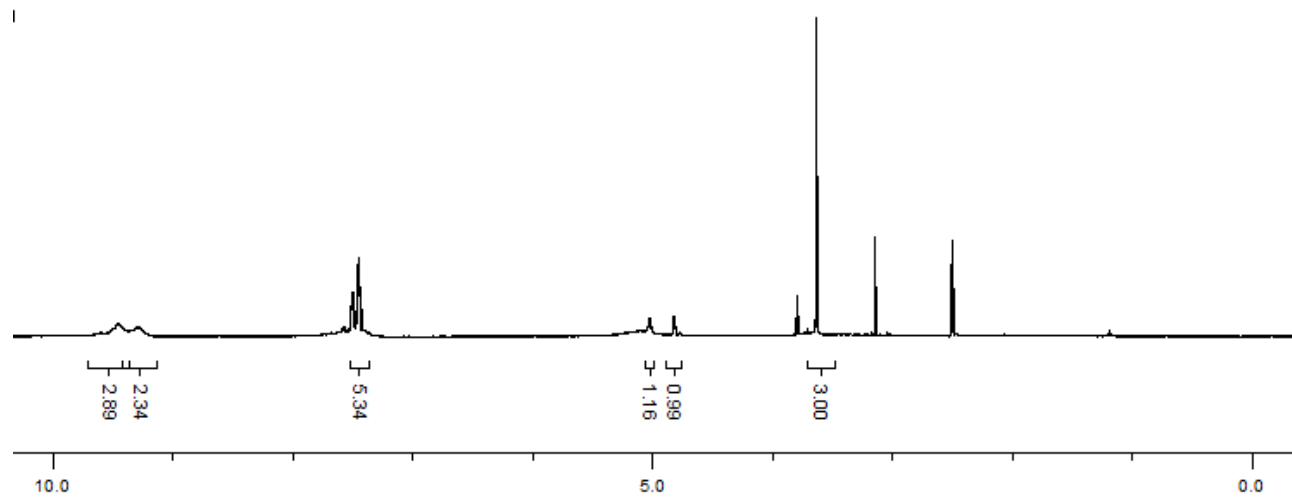



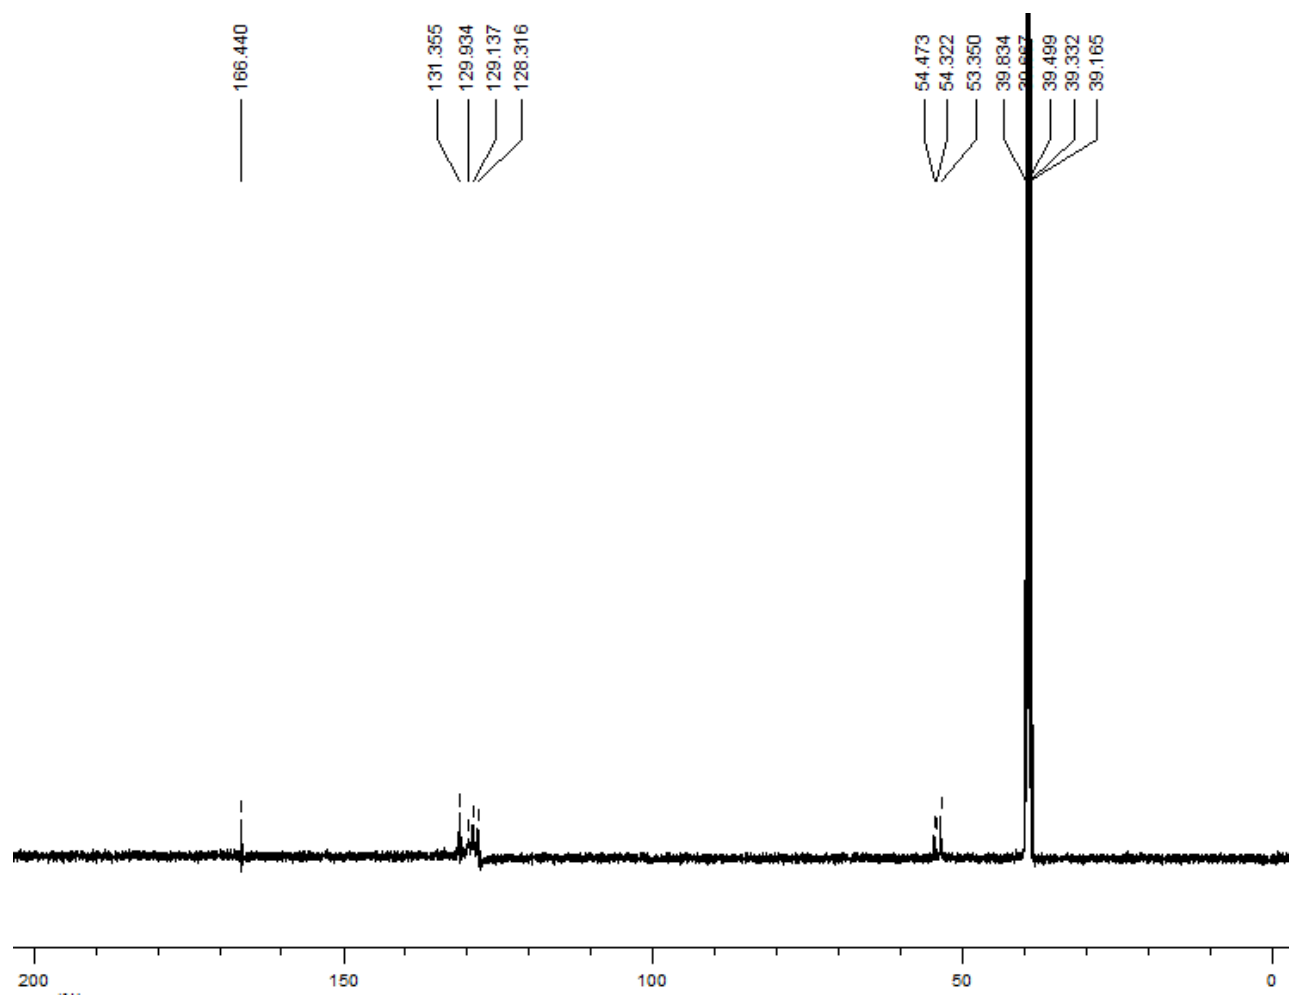



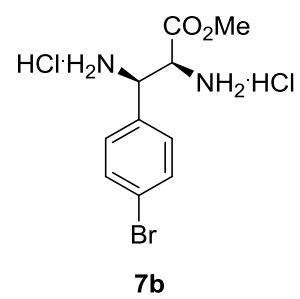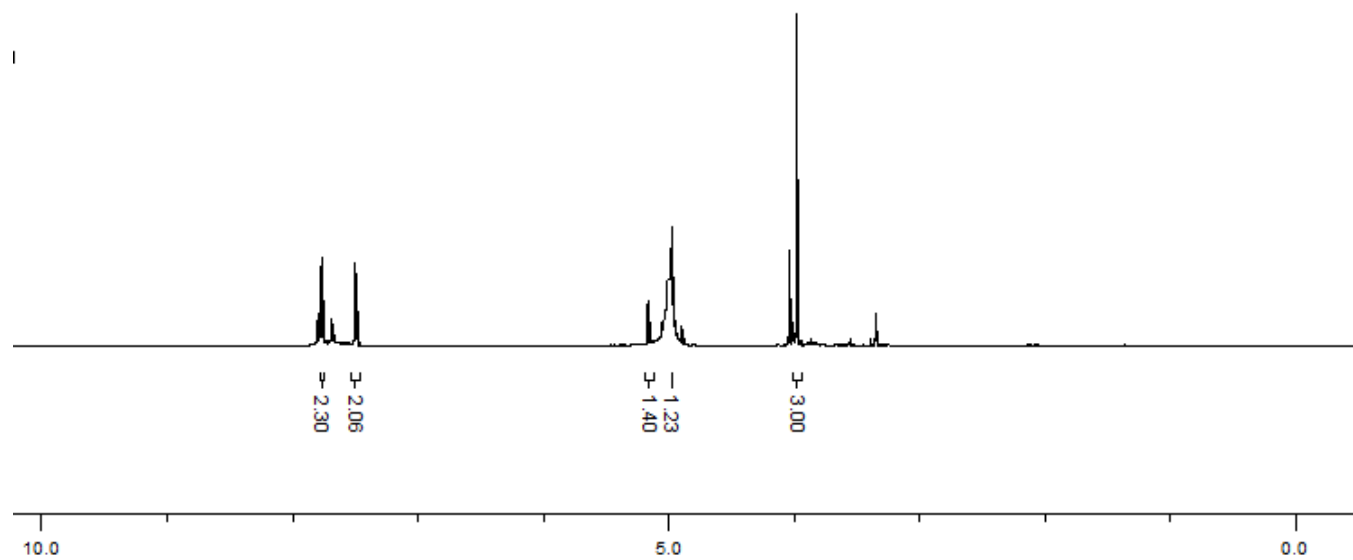



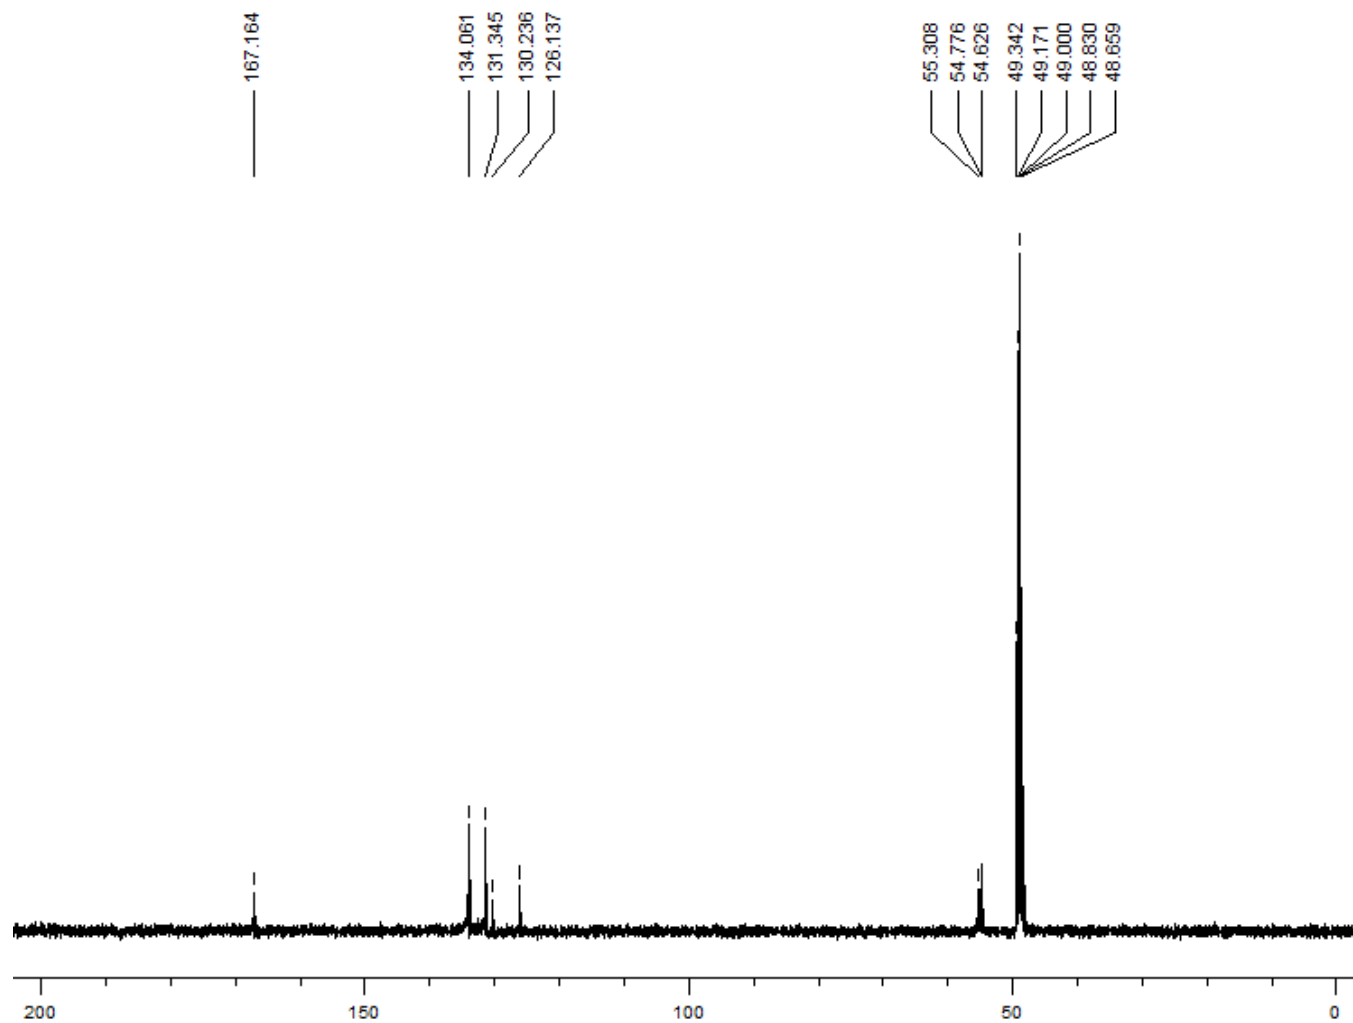



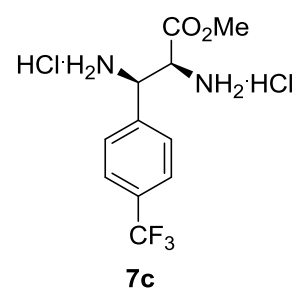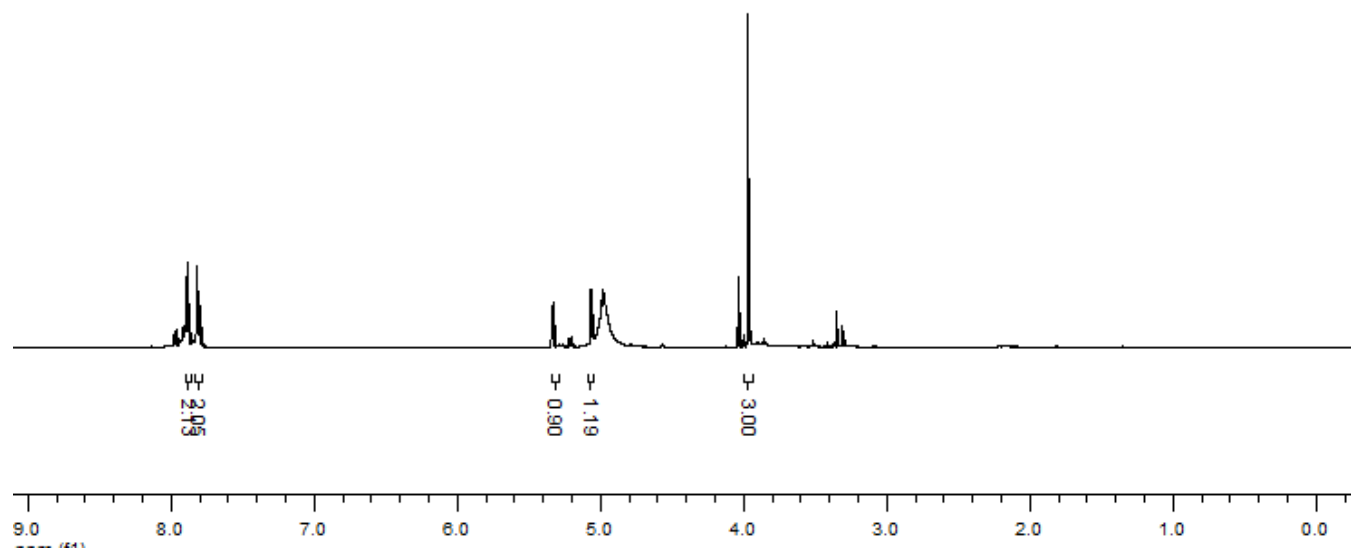



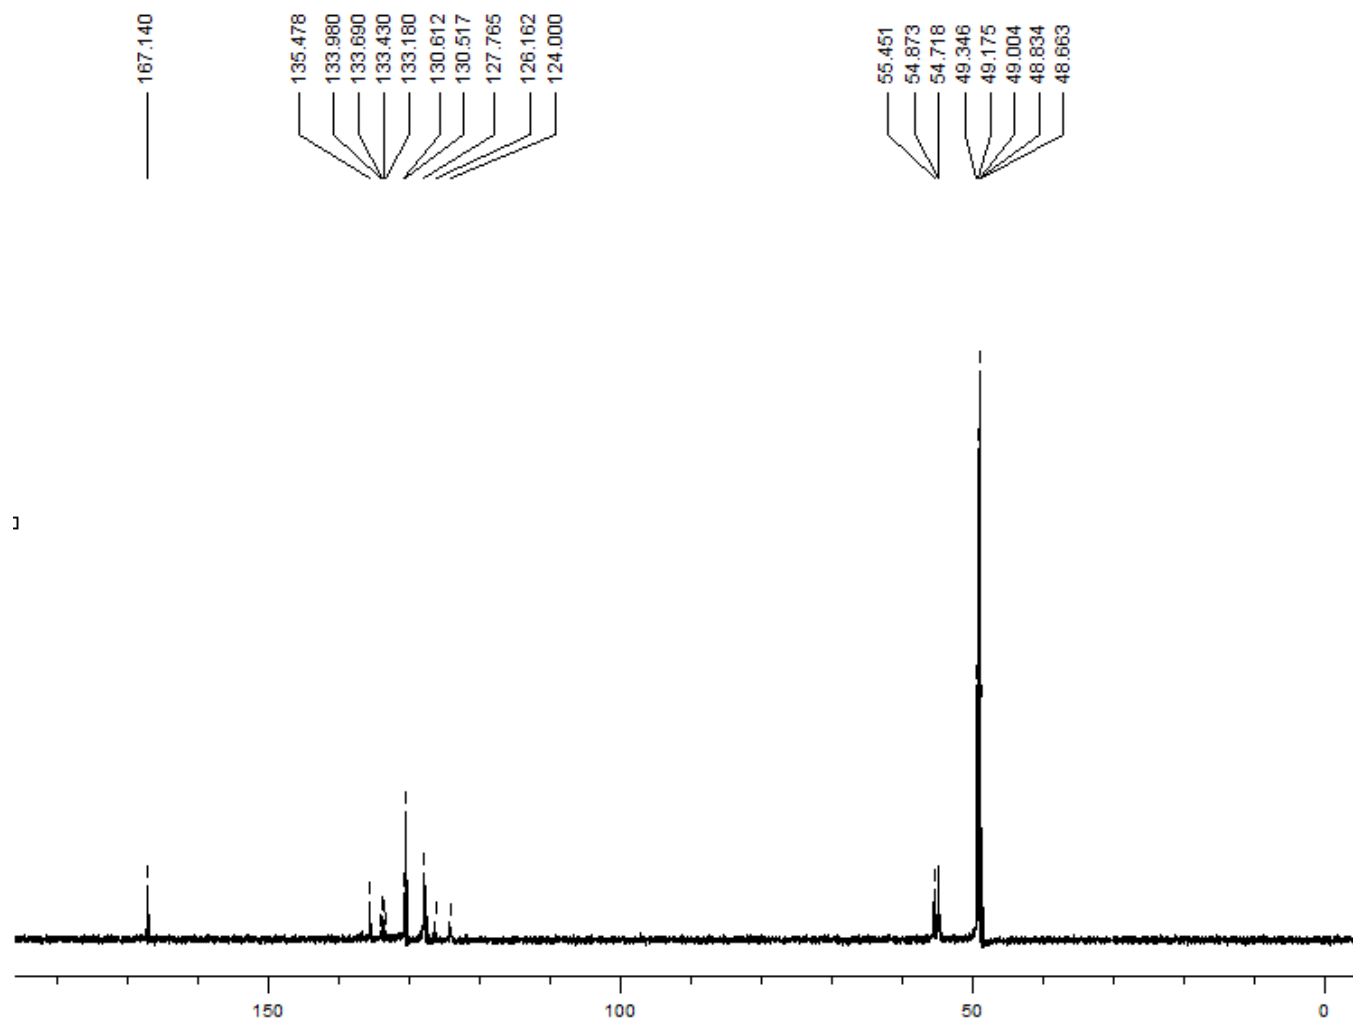



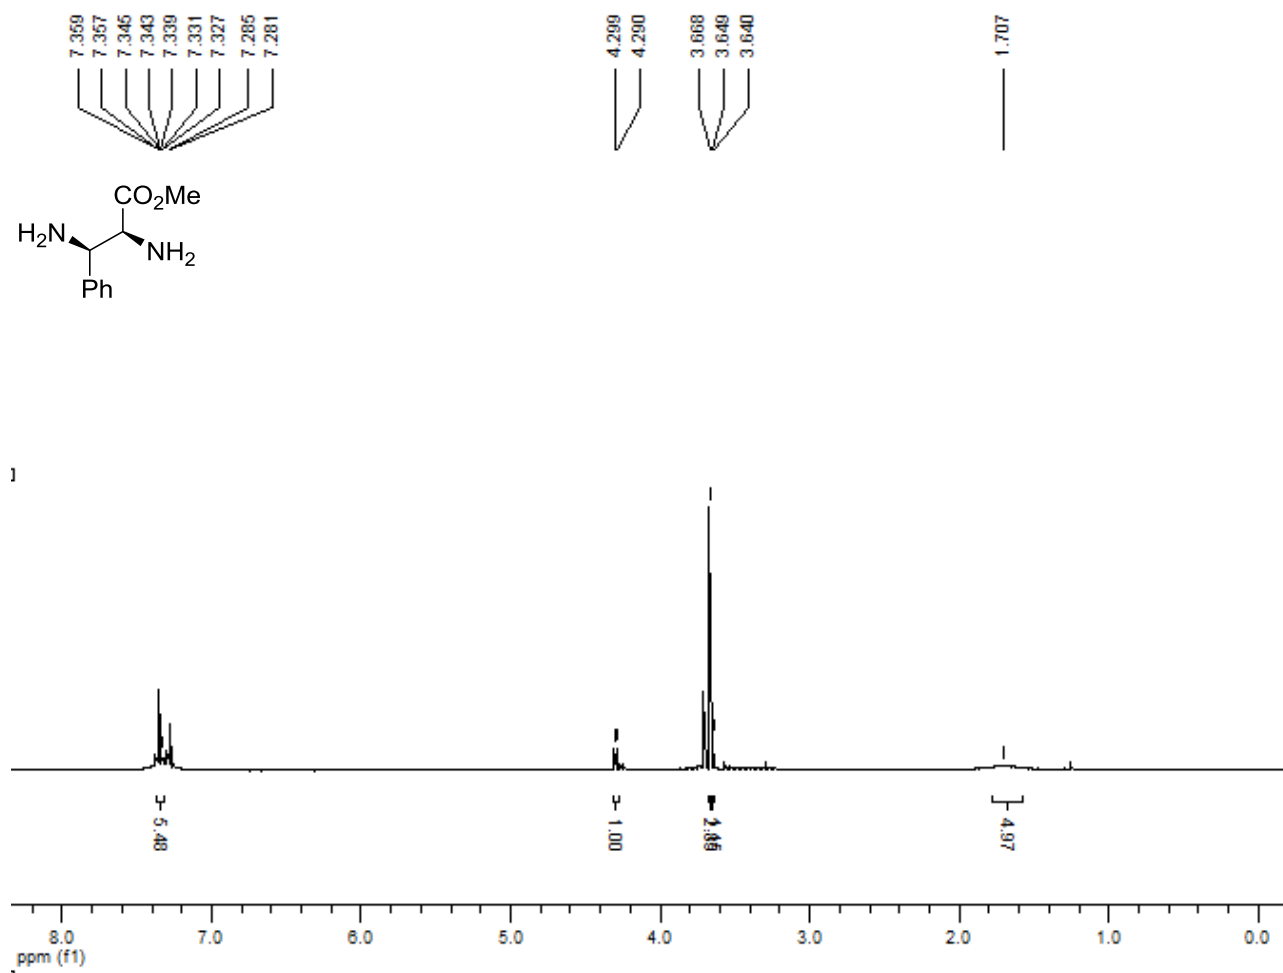



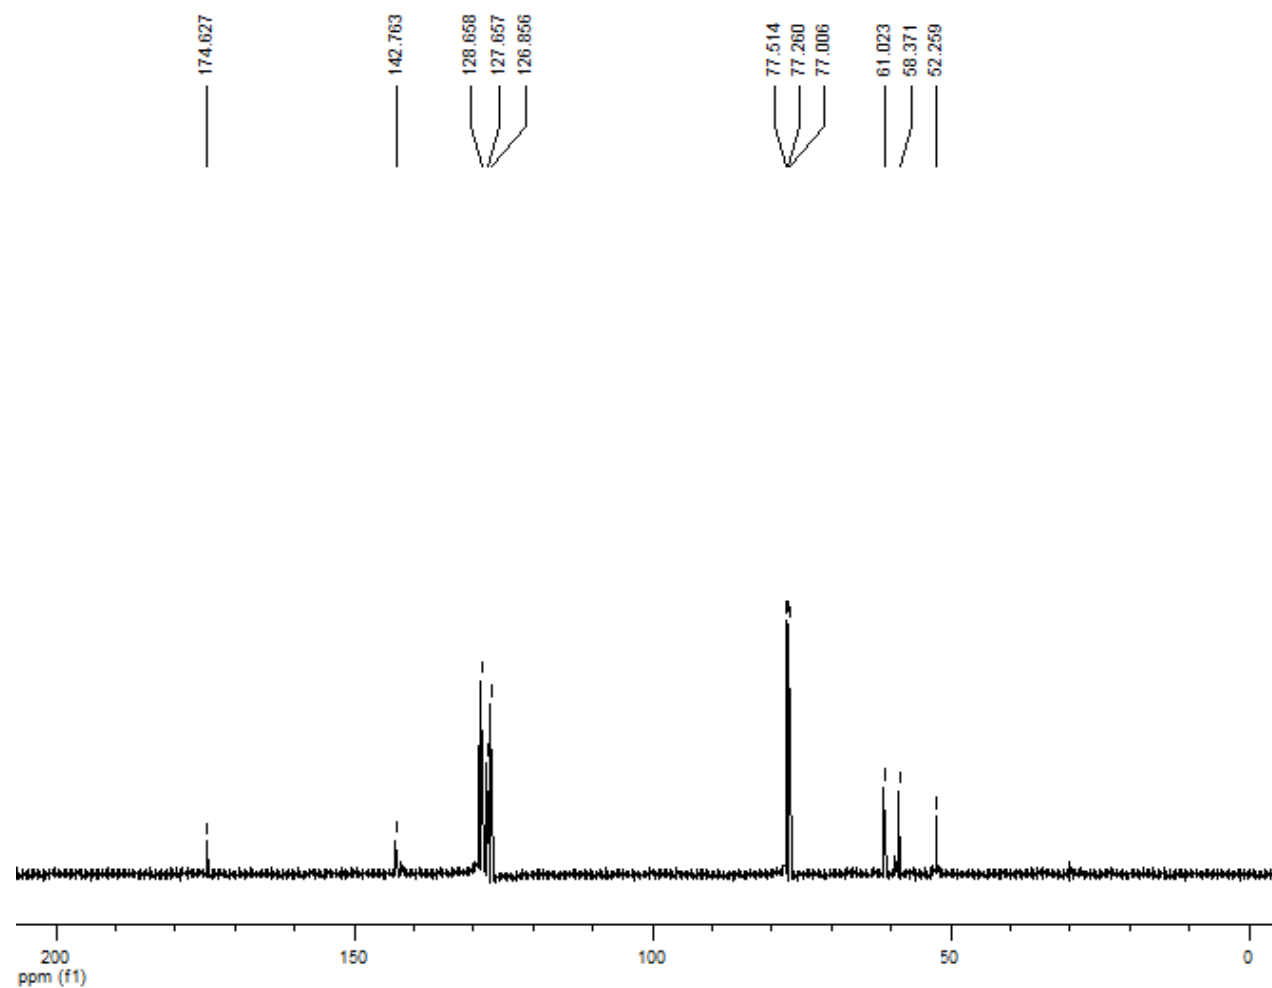



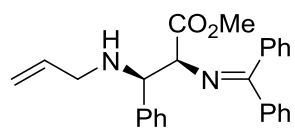

**8a**

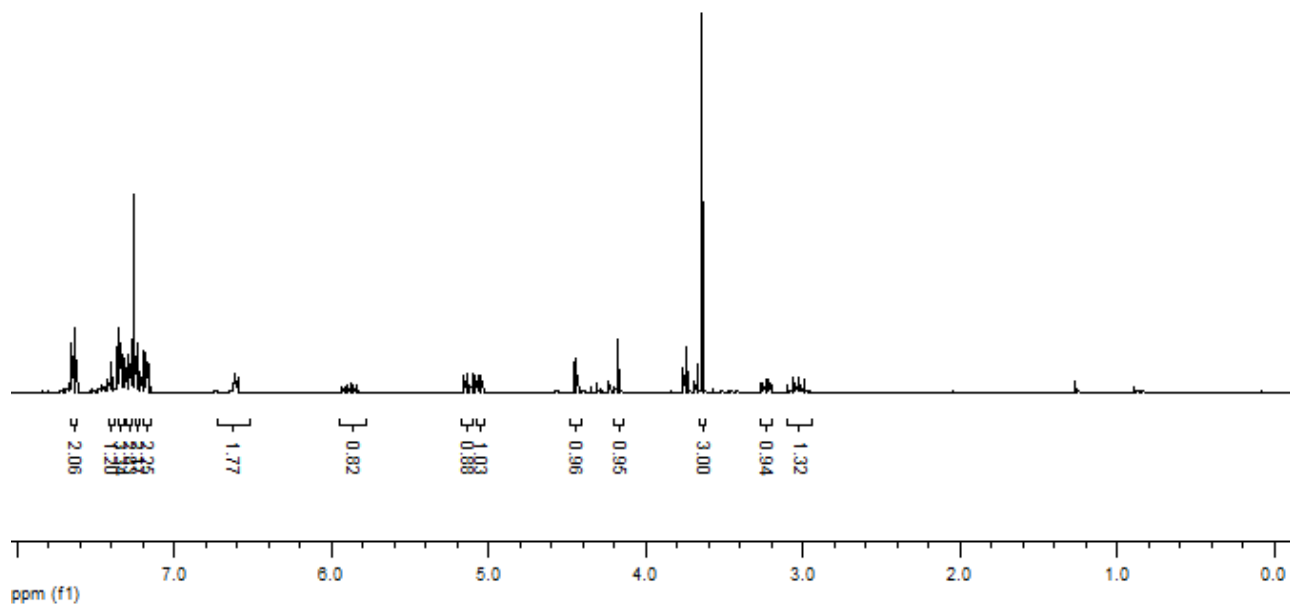



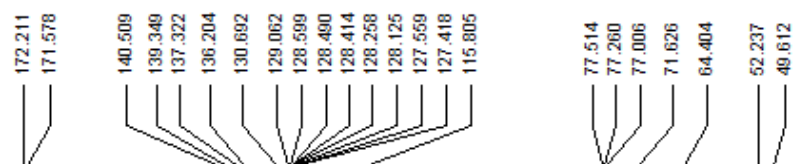

1

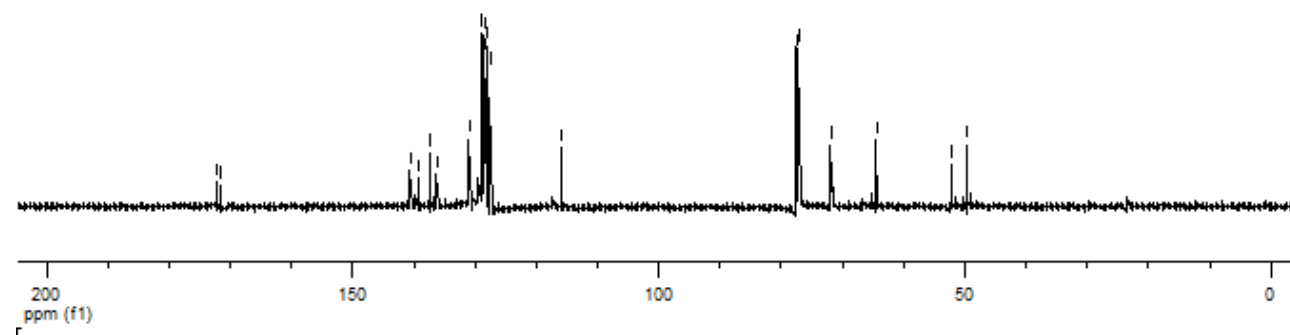



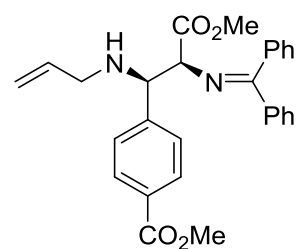

**8b**

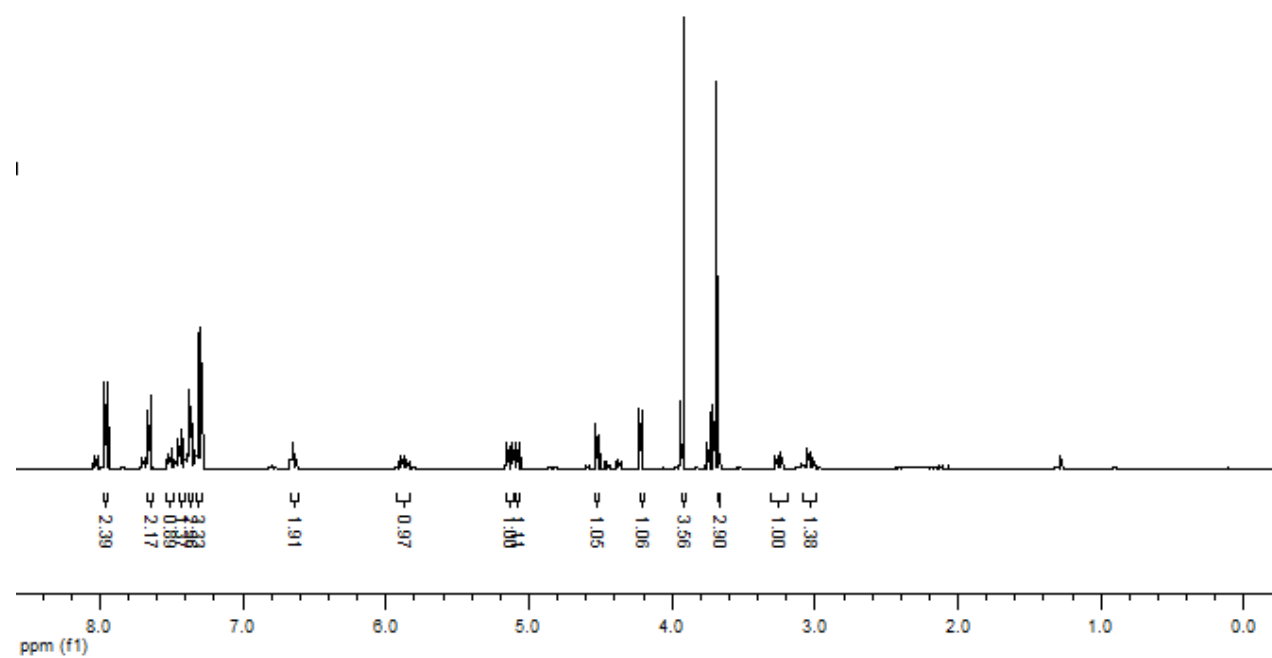



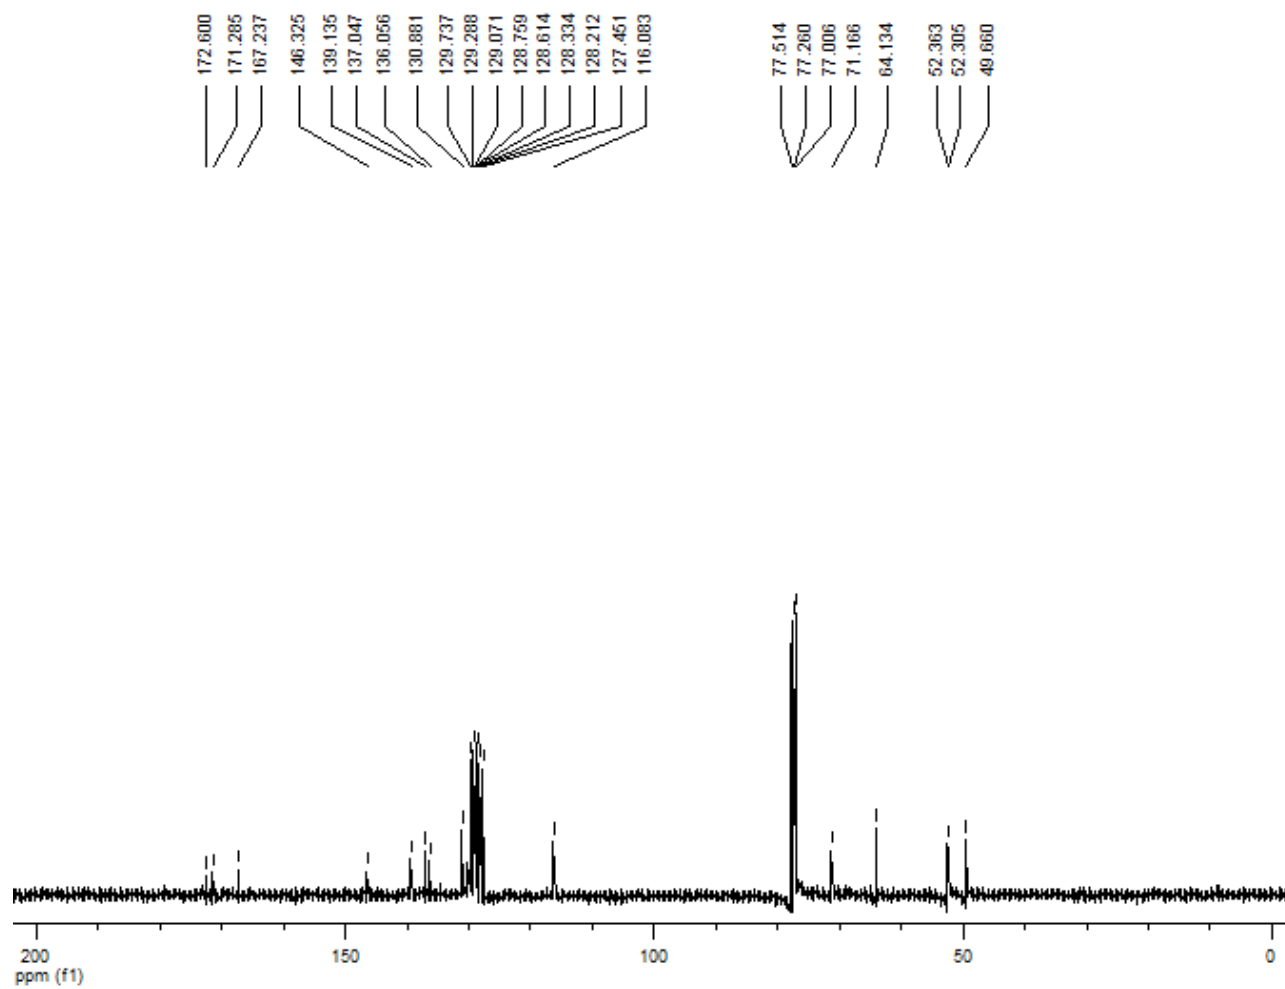



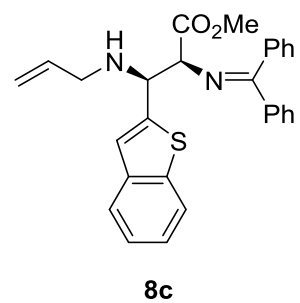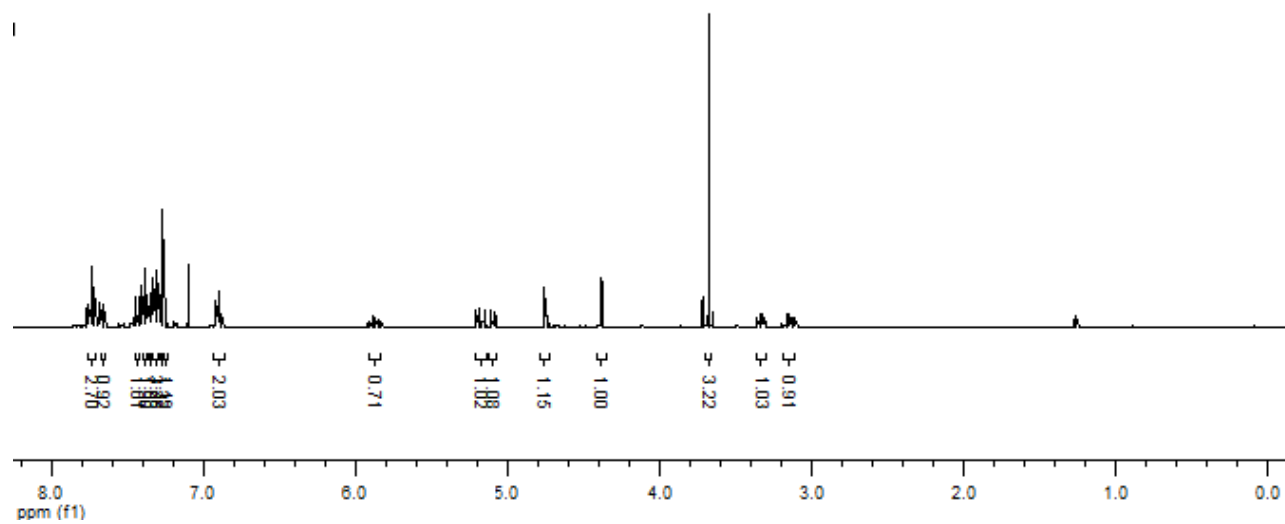



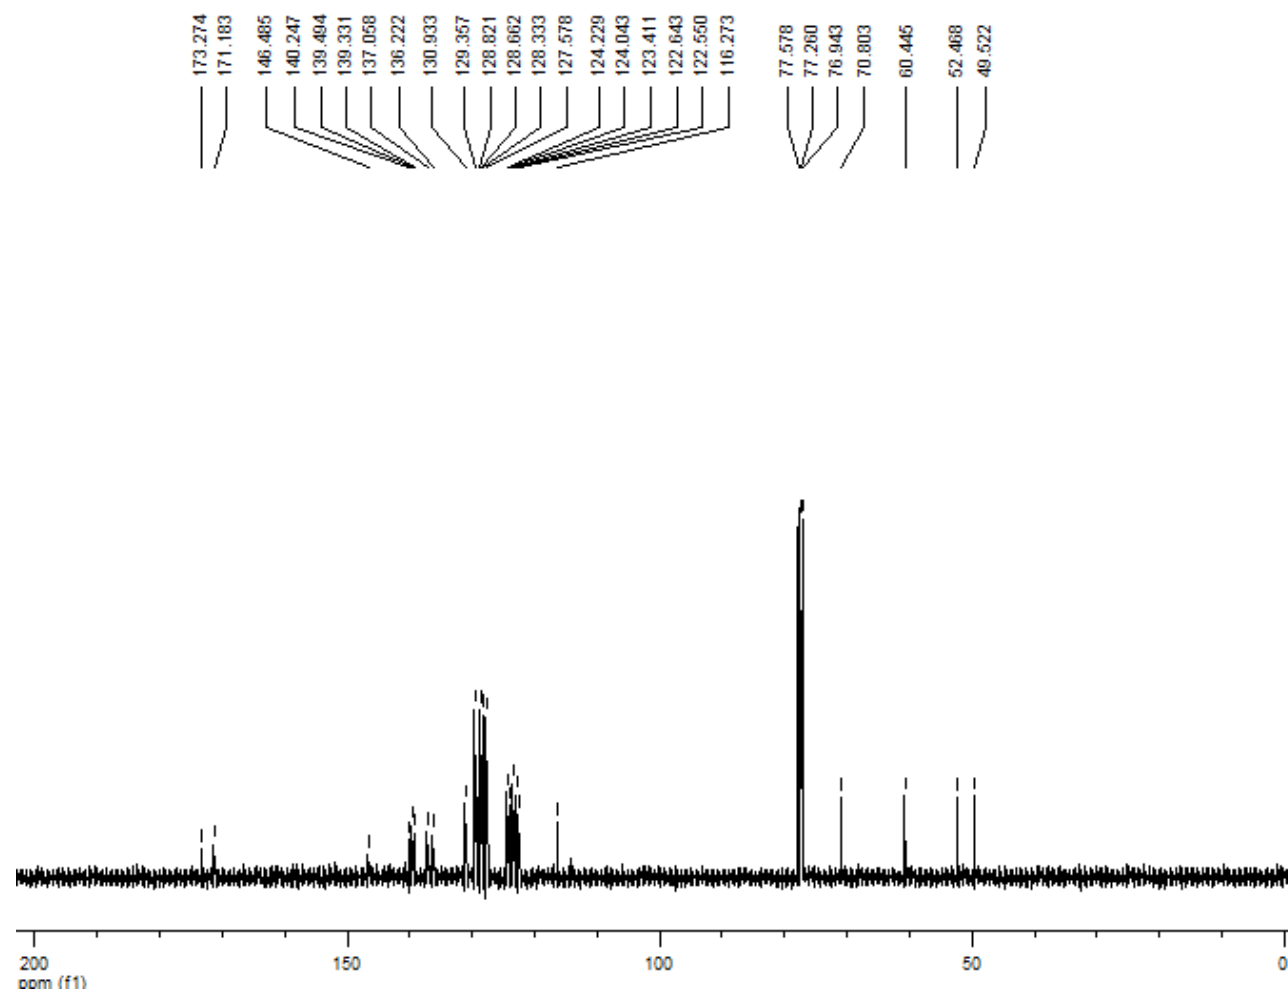



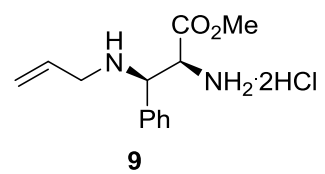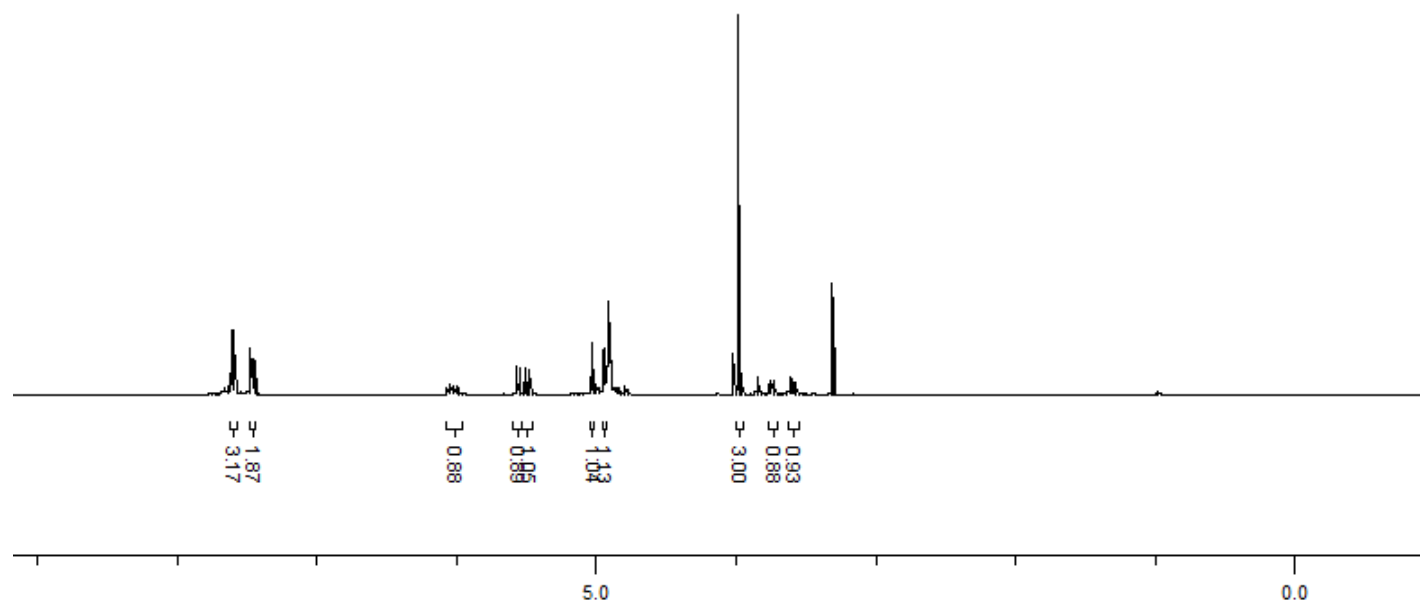



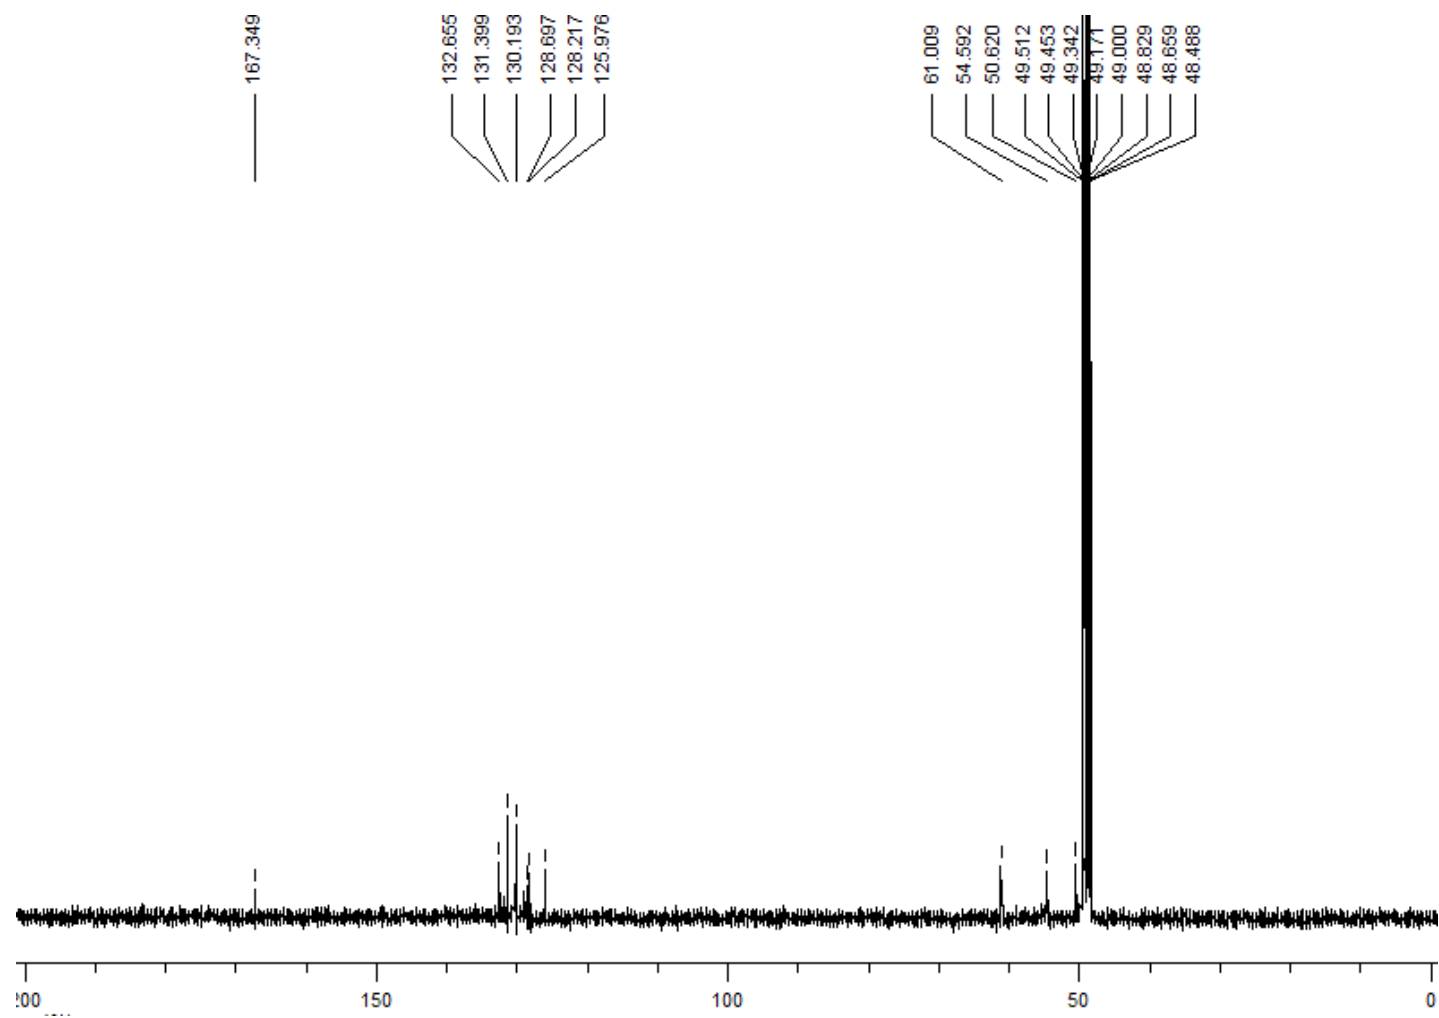



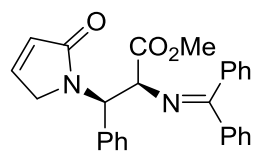

**10**

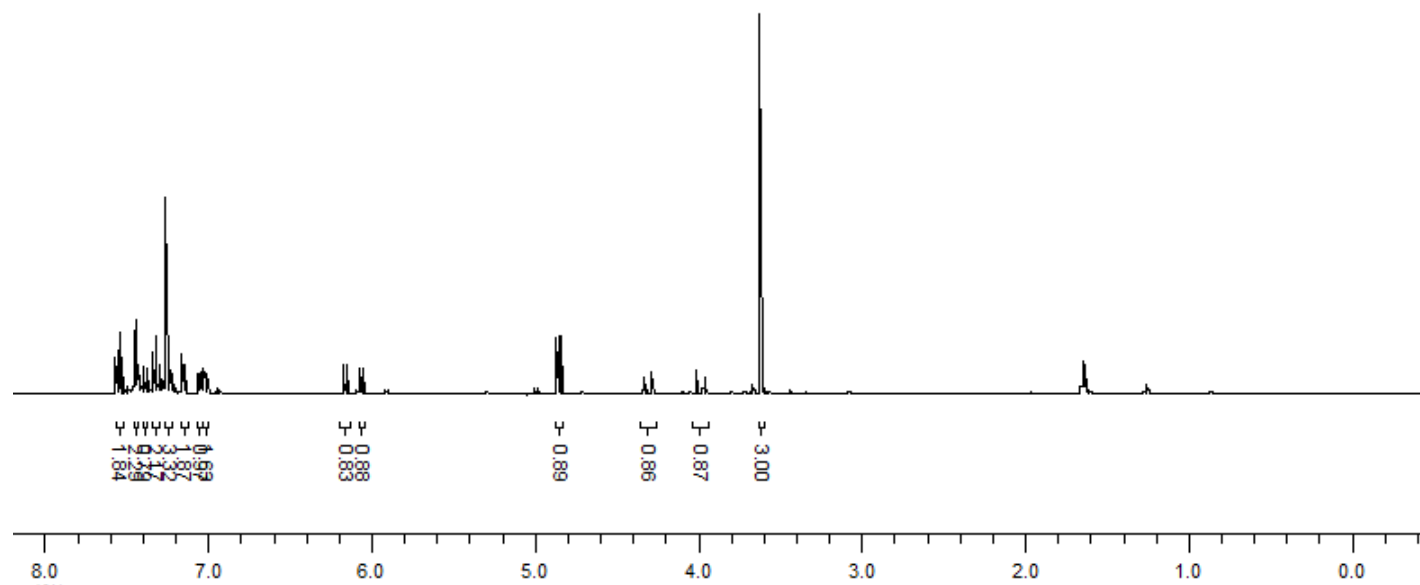



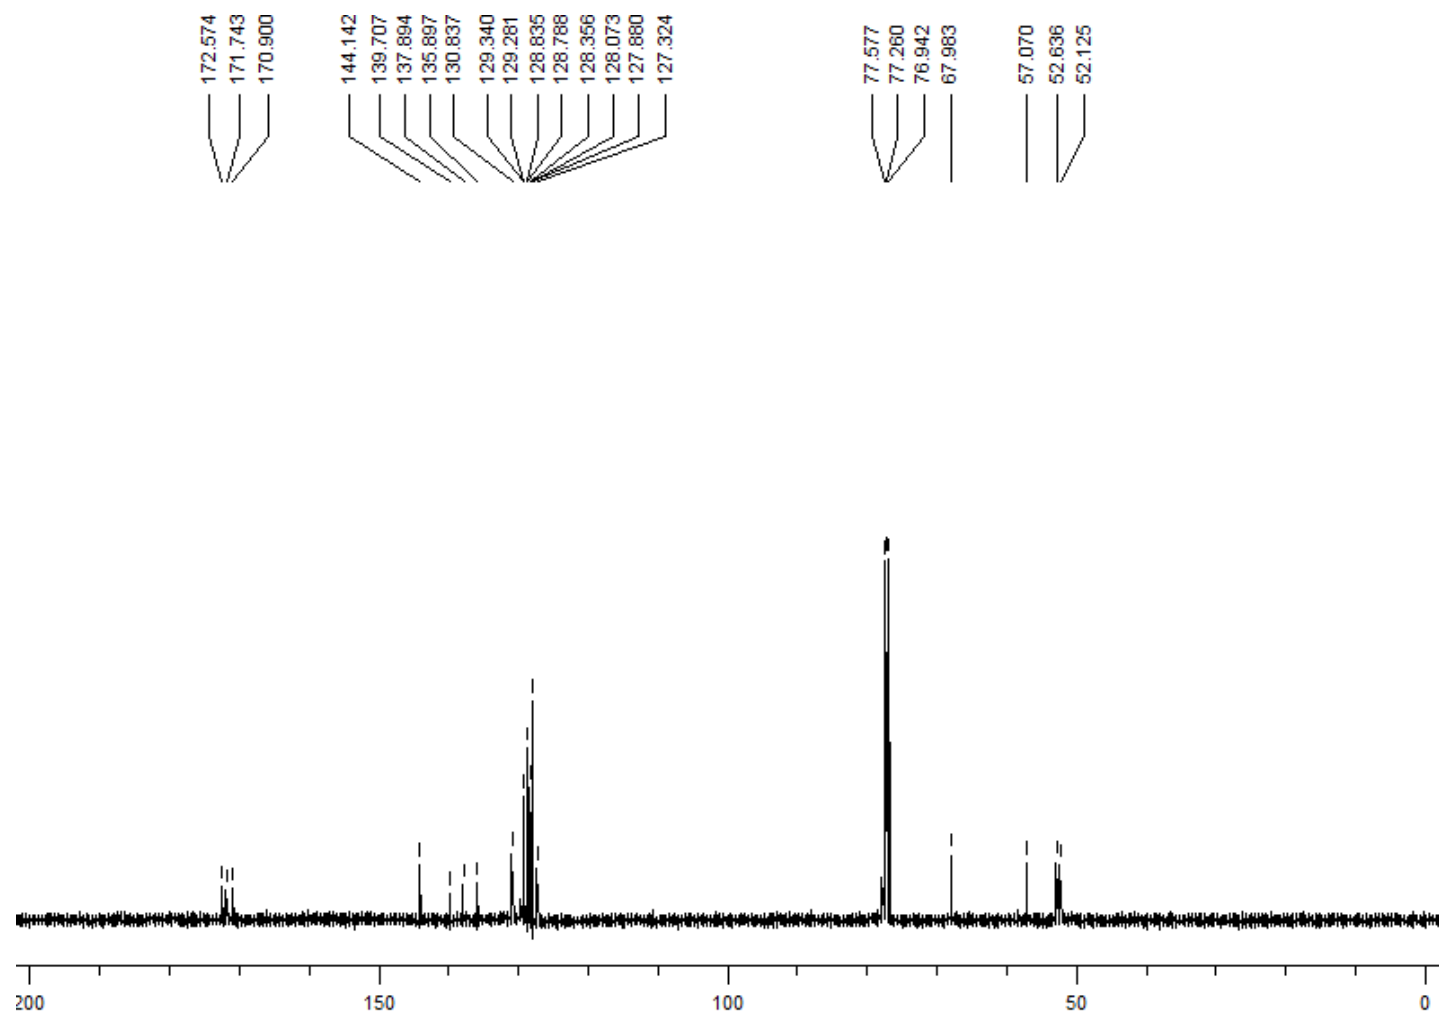



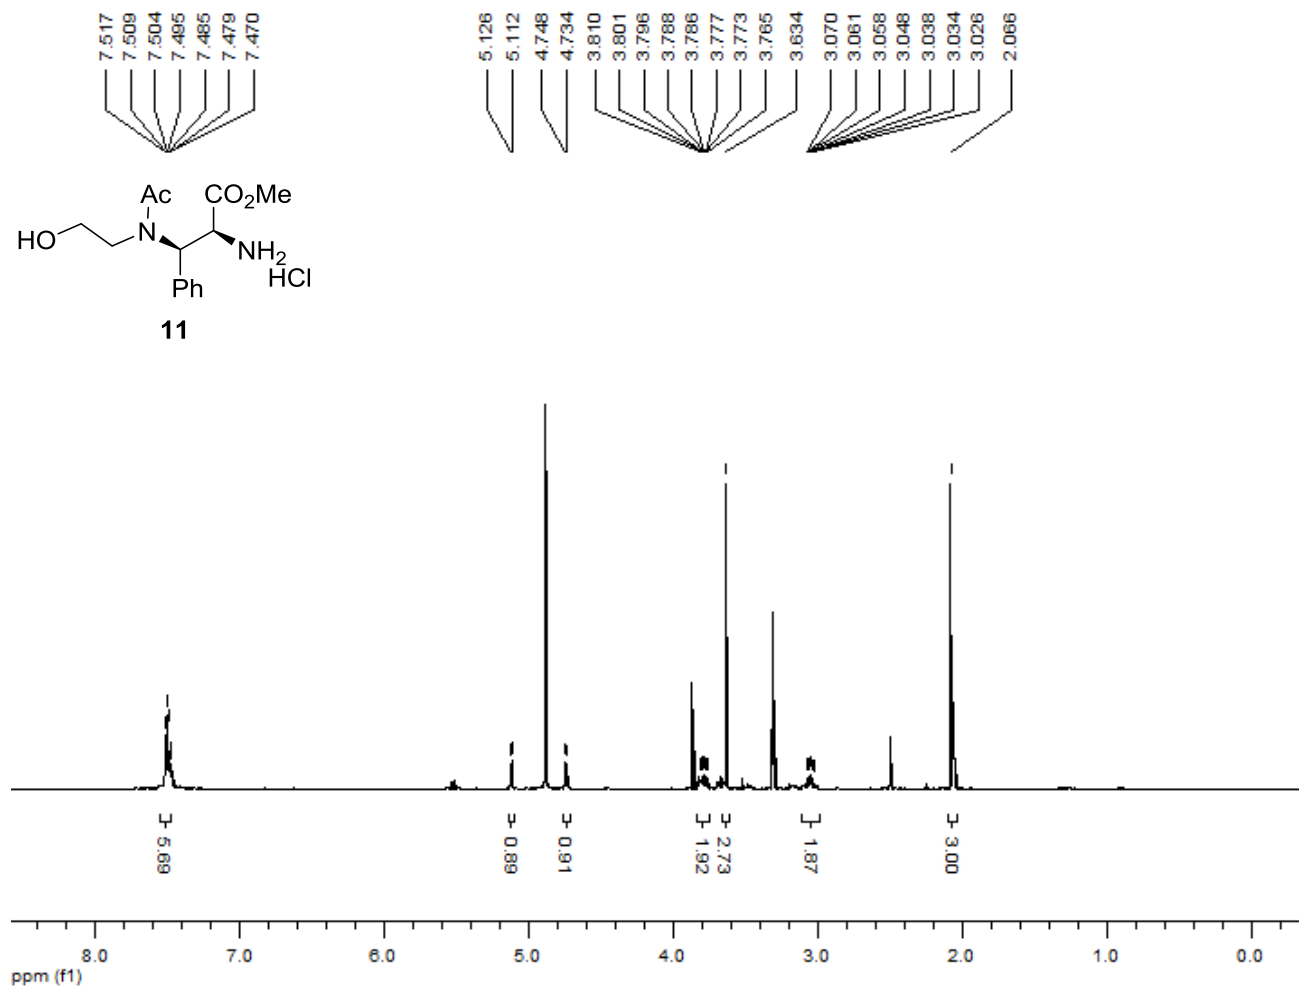



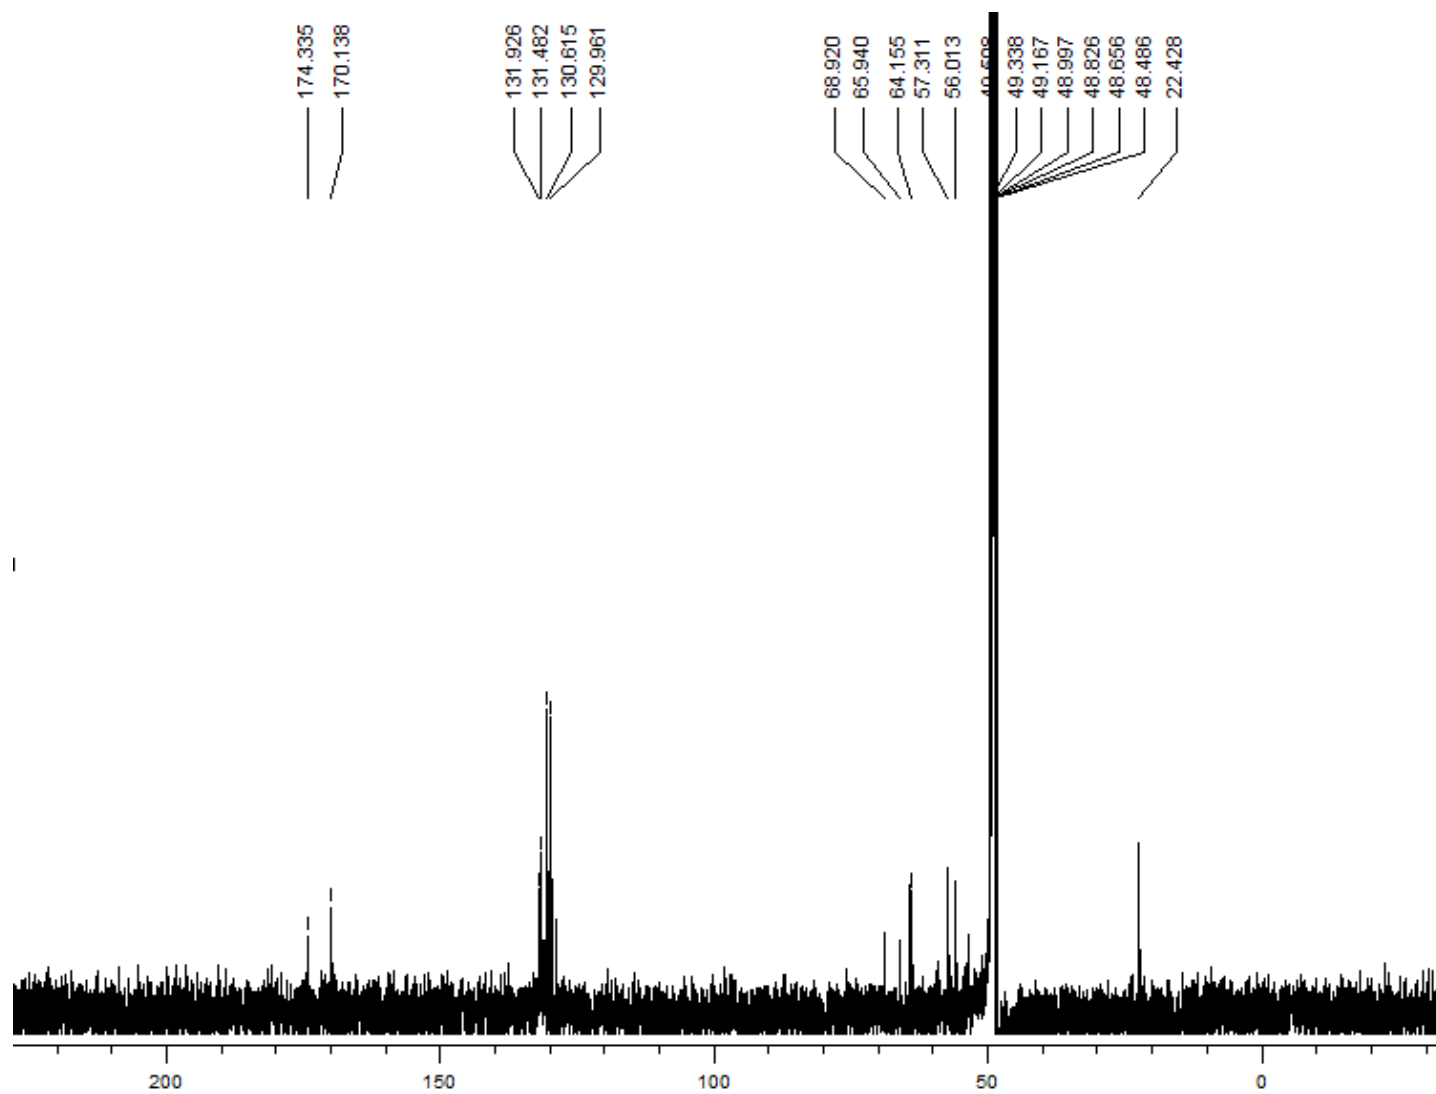



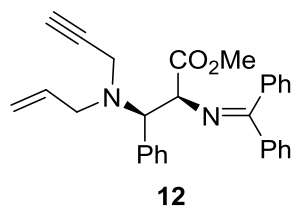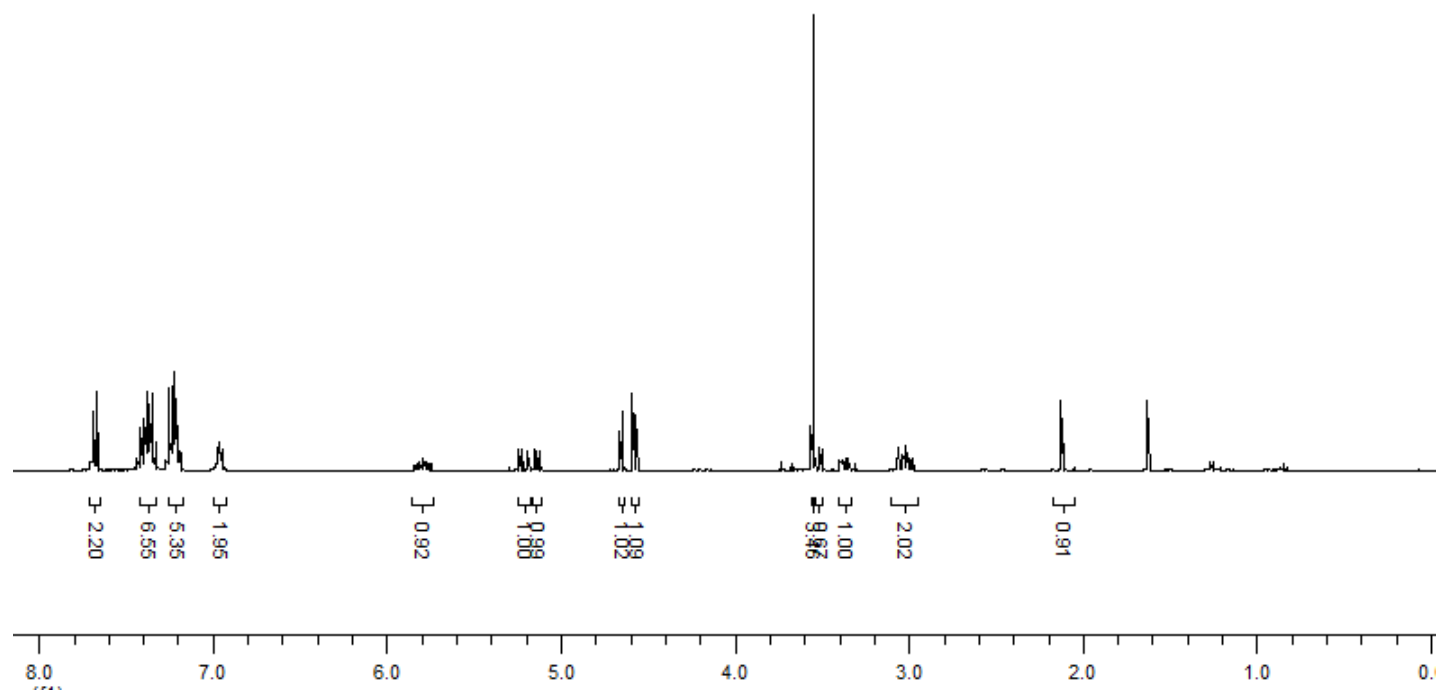



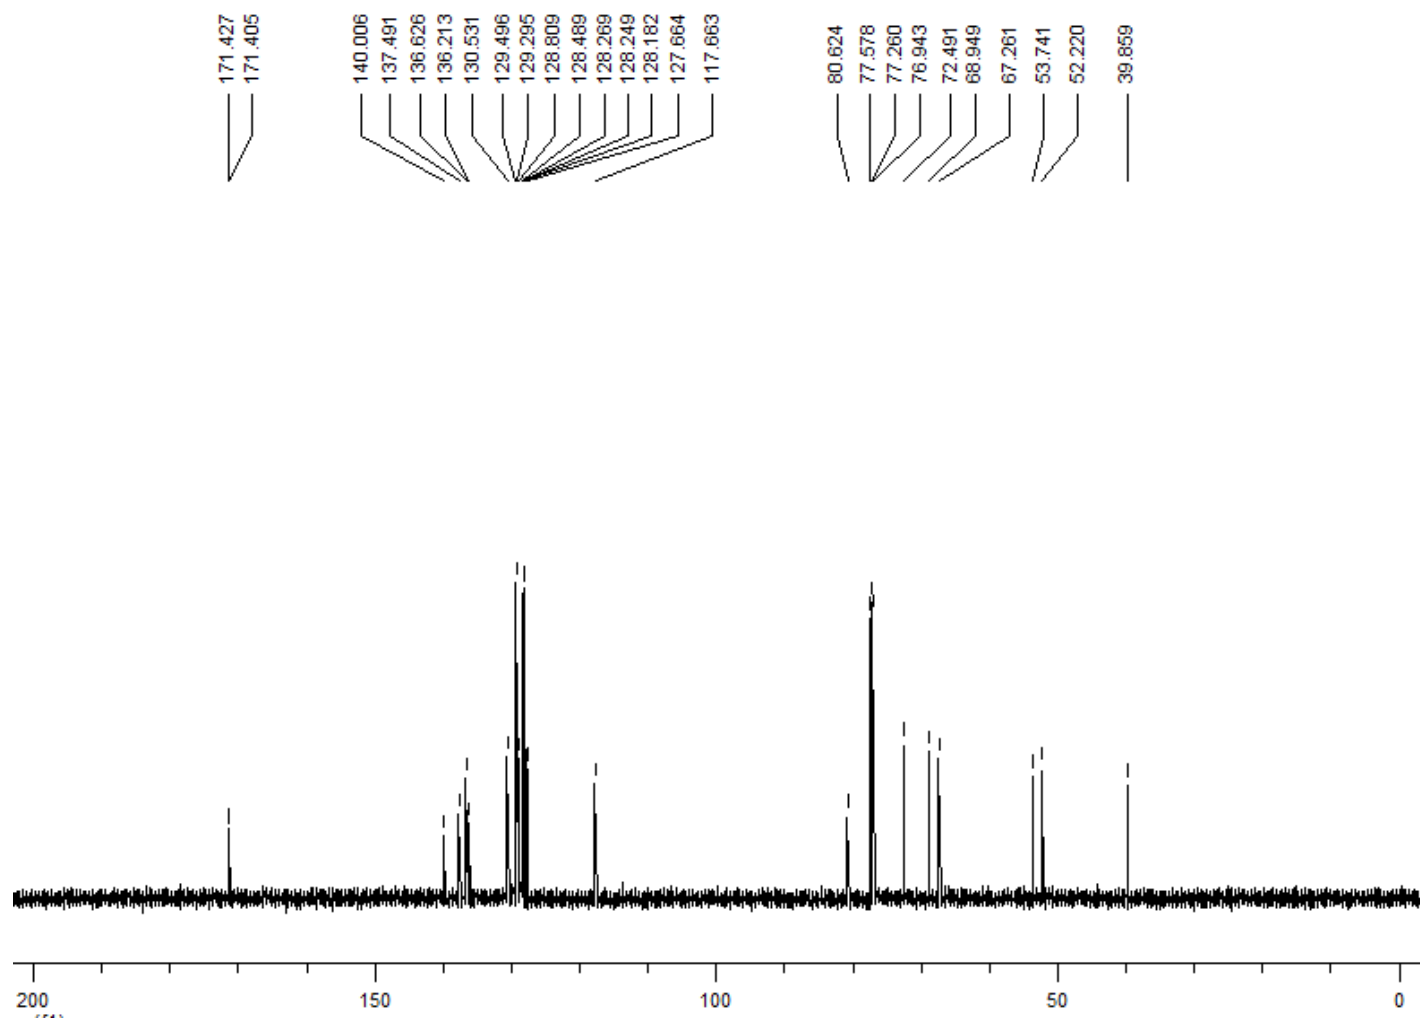



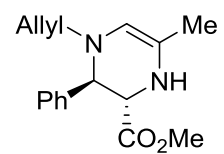

**13**

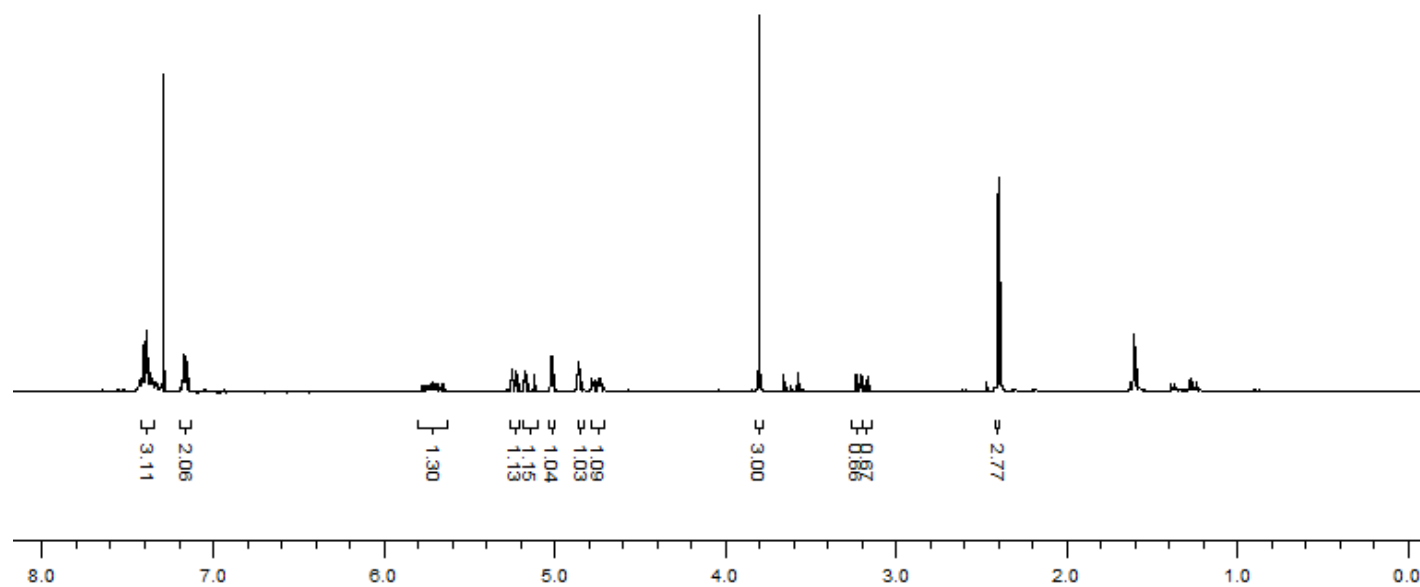



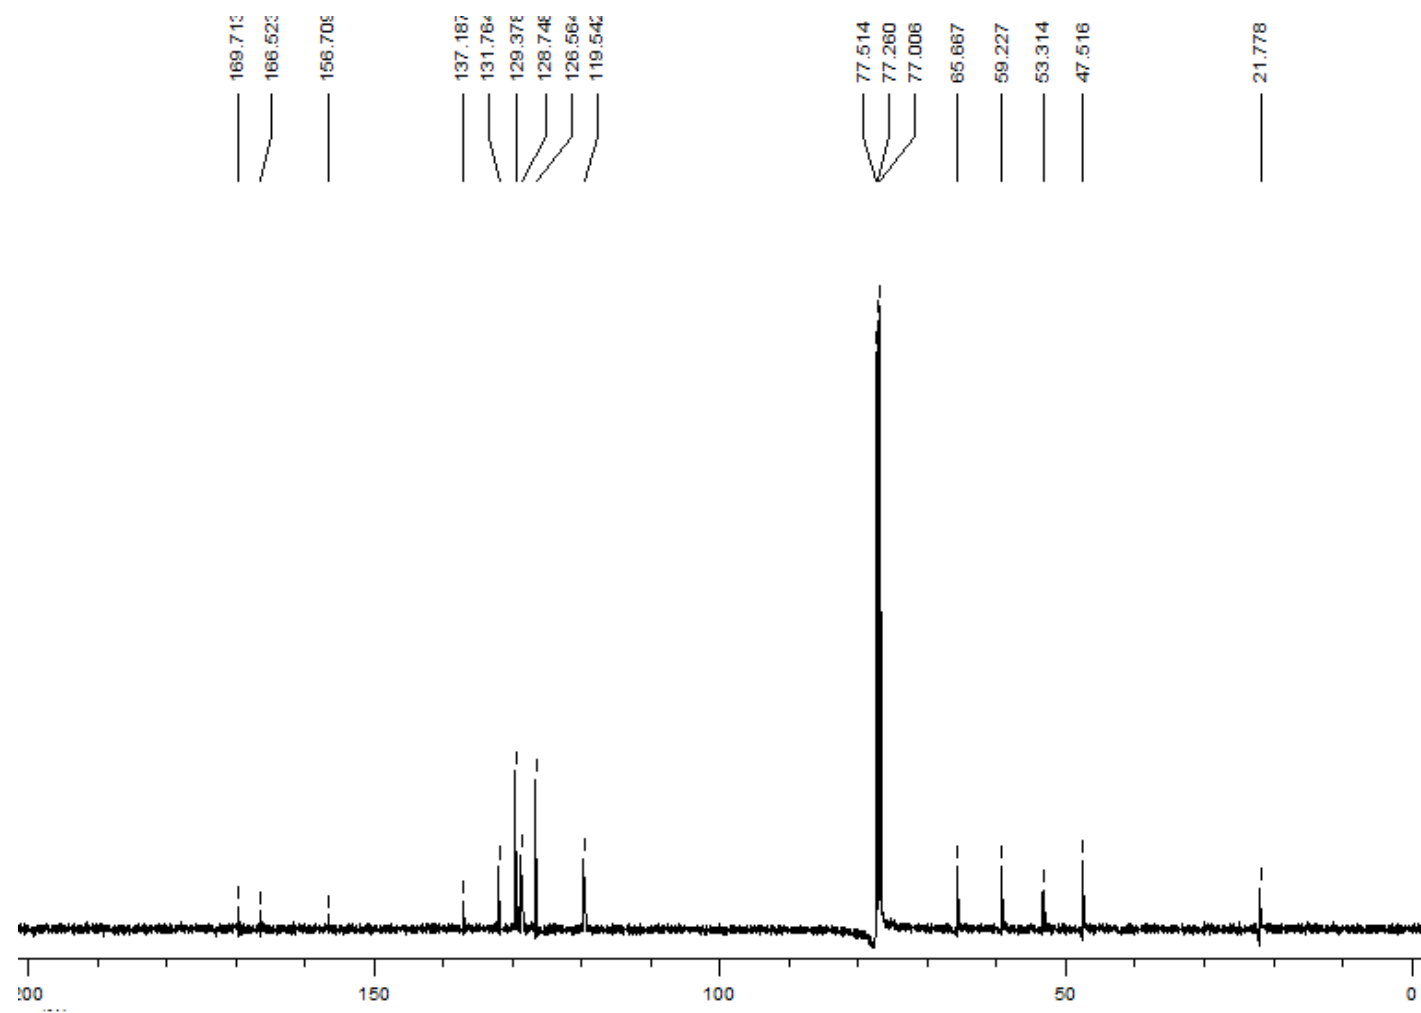



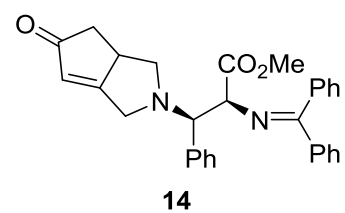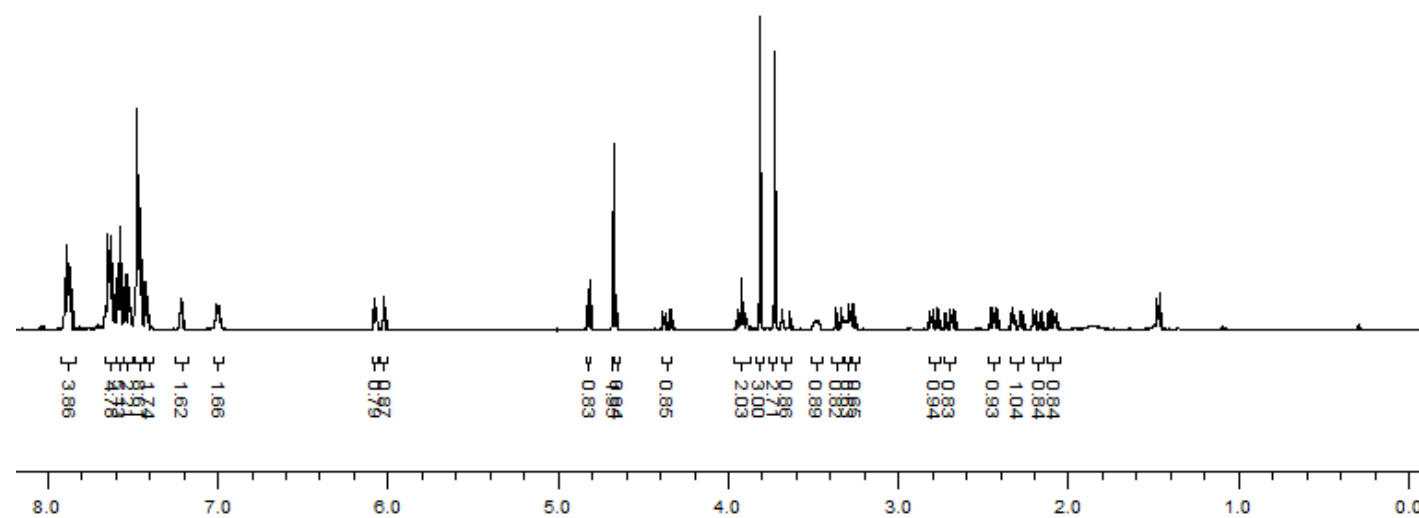



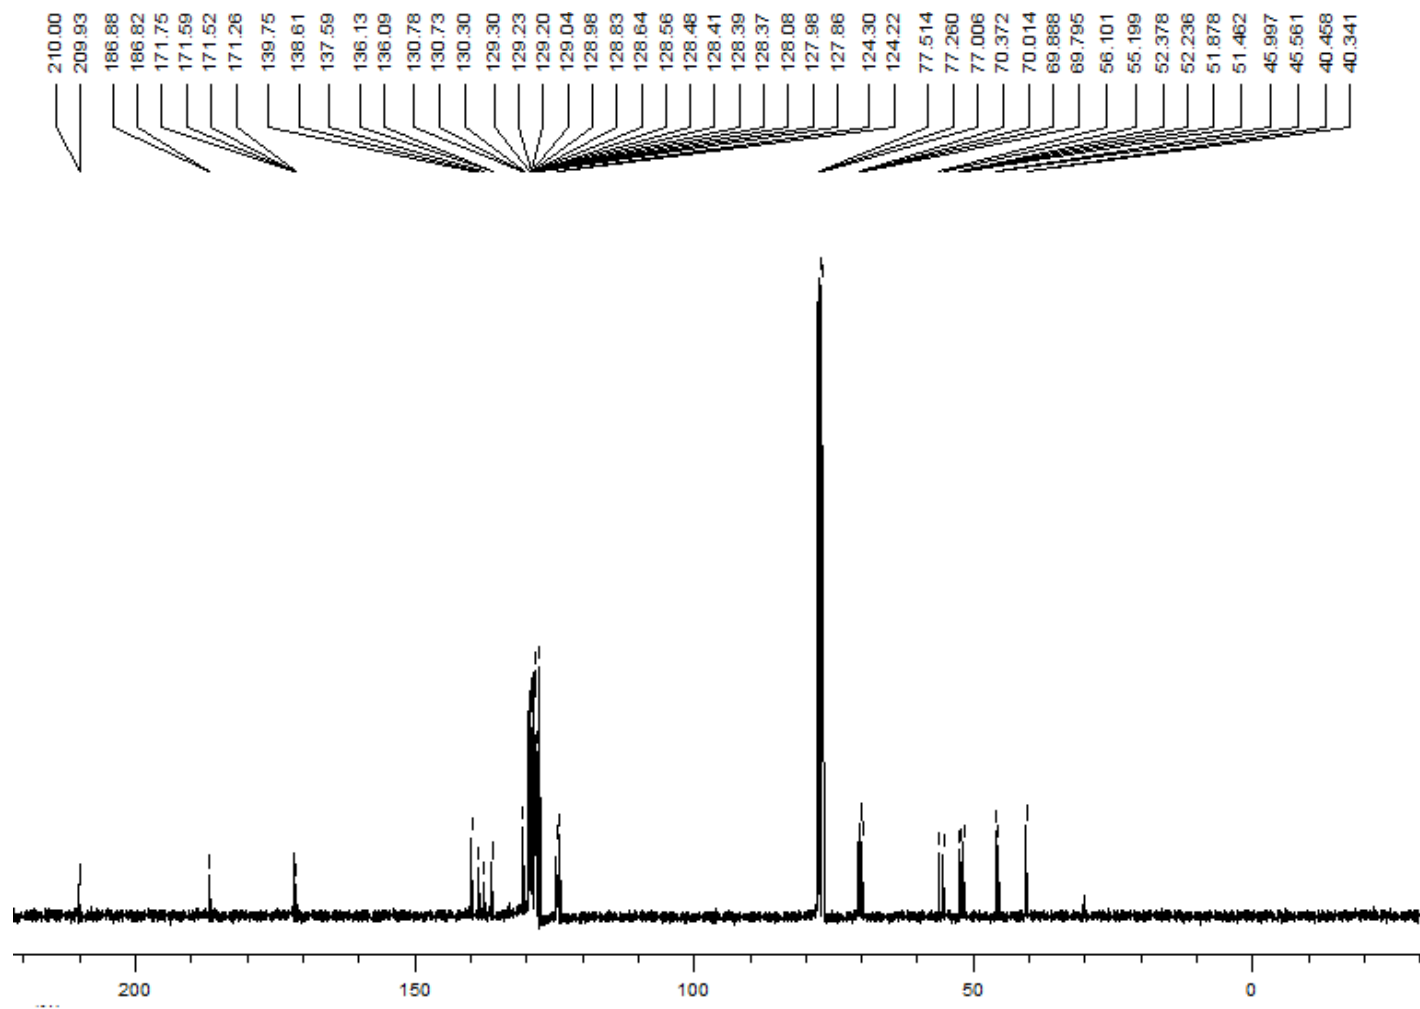

Supplement: c7sc02899g1.pdf [file c7sc02899g1.pdf]
